# Supplementary material for: Synthesis and Biological Activity of New 7-Amino-oxazolo[5,4-d]Pyrimidine Derivatives
Source: MDPI journal article supplement (doi:10.3390/molecules25153558), 2020-08-04
Supplement: s1 [file s1]

## SUPPLEMENTARY MATERIAL

### Synthesis and biological activity of new 7-aminooxazolo[5,4-*d*]pyrimidine derivatives

Aleksandra Sochacka-Ćwikła <sup>1</sup>, Andrzej Regiec <sup>1,\*</sup>, Michał Zimecki <sup>2</sup>, Jolanta Artym <sup>2</sup>, Ewa Zaczynska <sup>2</sup>, Maja Kocięba <sup>2</sup>, Iwona Kochanowska <sup>2</sup>, Iwona Bryndal <sup>3</sup>, Anna Pyra <sup>4</sup> and Marcin Mączynski <sup>1</sup>

<sup>1</sup> Department of Organic Chemistry, Faculty of Pharmacy, Wrocław Medical University, 211A Borowska Street, 50-556 Wrocław, Poland; aleksandra.sochacka-cwikla@umed.wroc.pl (A.S.-Ć.); marcin.maczynski@umed.wroc.pl (M.M.)

<sup>2</sup> Department of Experimental Therapy, Institute of Immunology and Experimental Therapy, Polish Academy of Sciences, 12 Rudolf Weigl Street, 53-114 Wrocław, Poland; michal.zimecki@hirszfeld.pl (M.Z.); jolanta.artym@hirszfeld.pl (J.A.); ewa.zaczynska@hirszfeld.pl (E.Z.); maja.kocieba@hirszfeld.pl (M.K.); iwona.kochanowska@hirszfeld.pl (I.K.)

<sup>3</sup> Department of Drug Technology, Faculty of Pharmacy, Wrocław Medical University, 211A Borowska Street, 50-556 Wrocław, Poland; iwona.bryndal@umed.wroc.pl

<sup>4</sup> Faculty of Chemistry, University of Wrocław, 14 Joliot-Curie, 50-383 Wrocław, Poland; anna.pyra@uwr.edu.pl

---

\*Correspondence: andrzej.regiec@umed.wroc.pl, Tel./Fax: +48717840347

# TABLE OF CONTENTS

|                                                                                                                                                                        |    |
|------------------------------------------------------------------------------------------------------------------------------------------------------------------------|----|
| Chemistry .....                                                                                                                                                        | 4  |
| Electrospray Mass Ionization (ESI) measurements of intermediates (2-4), oxazolo[5,4- <i>d</i> ]pyrimidines (5a-5l) and <i>N'</i> -cyanooxazolylacetamidines (7m) ..... | 4  |
| Analysis and Visualizations of Electrospray Mass Ionization (ESI) spectra of the compounds 2-4 .....                                                                   | 4  |
| Analysis and Visualizations of Electrospray Mass Ionization (ESI) spectra of the compounds 5a-5l.....                                                                  | 6  |
| Analysis and Visualizations of Electrospray Mass Ionization (ESI) spectra of compound 7m.....                                                                          | 15 |
| Visualizations of Nuclear magnetic resonance (NMR) and Infrared (IR) spectra of compound 2 .....                                                                       | 16 |
| Visualizations of Nuclear magnetic resonance (NMR) and Infrared (IR) spectra of compound 3 .....                                                                       | 17 |
| Visualizations of Nuclear magnetic resonance (NMR) and Infrared (IR) spectra of compound 4 .....                                                                       | 19 |
| Visualizations of Nuclear magnetic resonance (NMR) and Infrared (IR) spectra of compound 5a.....                                                                       | 20 |
| Visualizations of Nuclear magnetic resonance (NMR) and Infrared (IR) spectra of compound 5b .....                                                                      | 23 |
| Visualizations of Nuclear magnetic resonance (NMR) and Infrared (IR) spectra of compound 5c.....                                                                       | 26 |
| Visualizations of Nuclear magnetic resonance (NMR) and Infrared (IR) spectra of compound 5d .....                                                                      | 29 |
| Visualizations of Nuclear magnetic resonance (NMR) and Infrared (IR) spectra of compound 5e.....                                                                       | 30 |
| Visualizations of Nuclear magnetic resonance (NMR) and Infrared (IR) spectra of compound 5f.....                                                                       | 32 |
| Visualizations of Nuclear magnetic resonance (NMR) and Infrared (IR) spectra of compound 5g .....                                                                      | 33 |
| Visualizations of Nuclear magnetic resonance (NMR) and Infrared (IR) spectra of compound 5h .....                                                                      | 35 |
| Visualizations of Nuclear magnetic resonance (NMR) and Infrared (IR) spectra of compound 5i .....                                                                      | 36 |
| Visualizations of Nuclear magnetic resonance (NMR) and Infrared (IR) spectra of compound 5j .....                                                                      | 40 |
| Visualizations of Nuclear magnetic resonance (NMR) and Infrared (IR) spectra of compound 5k .....                                                                      | 42 |

|                                                                                                   |    |
|---------------------------------------------------------------------------------------------------|----|
| Visualizations of Nuclear magnetic resonance (NMR) and Infrared (IR) spectra of compound 5l ..... | 43 |
| Visualizations of Nuclear magnetic resonance (NMR) and Infrared (IR) spectra of compound 7m ..... | 45 |
| Single crystal X-ray diffraction measurement of compound 5h.....                                  | 46 |
| Biology .....                                                                                     | 49 |

## CHEMISTRY

### Electrospray Mass Ionization (ESI) measurements of intermediates (2-4), oxazolo[5,4-*d*]pyrimidines (5a-5l) and *N'*-cyanooxazolylacetamidines (7m)

Electrospray Mass Ionization (ESI) spectra of the all compounds were recorded with the compact<sup>TM</sup> Electrospray Ionisation-Quadrupole-Time of Flight (ESI-Q-TOF) Mass Spectrometer (Bruker Daltonics) in methanol solutions in positive ionization. The samples of the compounds were dissolved in methanol in eppendorf tubes and immediately measured. Tandem mass spectrometry MS/MS were performed with low-energy collision-induced dissociation (CID), nitrogen as collision gas. Collision energy in the range of 5-30 eV.

HR-ESI-MS measurement conditions:

- mass spectrometer resolution above 16000 (in our measurements, the resolution = 23500)
- mass measurement error below  $|\pm 5|$  ppm (indicating a good mass measurement accuracy)

### Analysis and Visualizations of Electrospray Mass Ionization (ESI) spectra of the compounds 2-4

**Table S1.** Comparative set of masses of quasi-parent molecular  $[M+Na]^+$  ions (as base peaks) of the compounds **2-3** and quasi-parent molecular  $[M+H]^+$  ion (as base peak) of compound **4**. Errors associated with mass measurements of the compounds **2-4**.

| No.      | Calculated m/z for |                | Found m/z for base peaks<br>(percentage relative intensity) | Mass measurement<br>error (ppm) |
|----------|--------------------|----------------|-------------------------------------------------------------|---------------------------------|
|          | $[M+H]^+$ ion      | $[M+Na]^+$ ion |                                                             |                                 |
| <b>2</b> | -                  | 228.0491       | 228.0499 (100%)                                             | 3.51                            |
| <b>3</b> | -                  | 298.0911       | 298.0975 (100%)                                             | 21.47                           |
| <b>4</b> | 346.1510           | -              | 346.1445 (100%)                                             | -18.78                          |

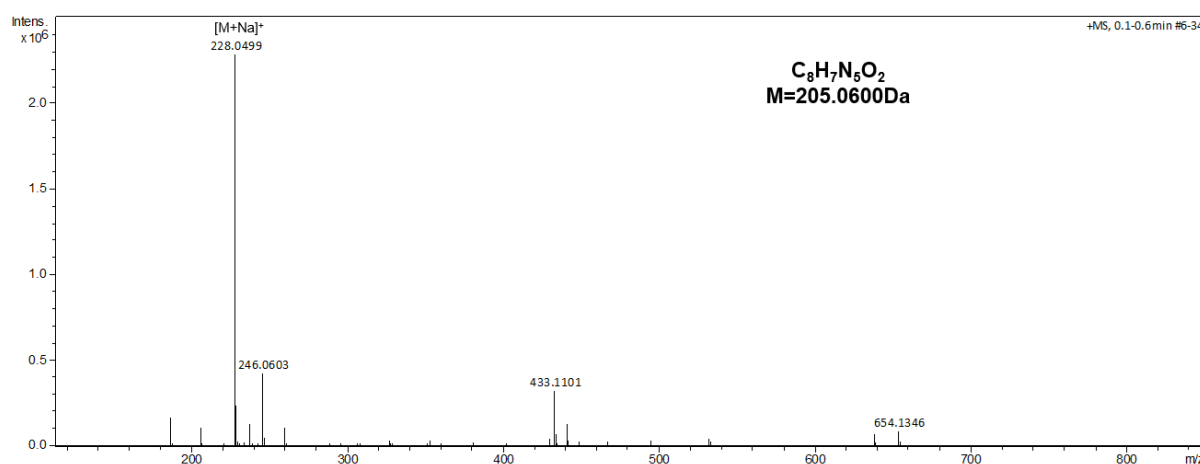

**Figure S1.** HR-ESI-MS spectrum of compound **2**.

**Table S2.** Analysis of other quasi-parent molecular ions of compound **2**.

| Other quasi-parent molecular ions of <b>2</b> | Calculated m/z | Found    |                                     | Mass measurement error (ppm) |
|-----------------------------------------------|----------------|----------|-------------------------------------|------------------------------|
|                                               |                | m/z      | Relative intensity (%) to base peak |                              |
| $[M+H]^+$                                     | 206.0672       | 206.0675 | 4.77                                | 1.46                         |
| $[M+CH_3OH+H]^+$                              | 238.0935       | 238.0938 | 5.59                                | 1.26                         |
| $[M+H_2O+Na]^+$                               | 246.0598       | 246.0603 | 18.58                               | 2.03                         |
| $[M+CH_3OH+Na]^+$                             | 260.0754       | 260.0757 | 4.59                                | 1.15                         |
| $[2M+Na]^+$                                   | 433.1092       | 433.1101 | 13.99                               | 2.08                         |
| $[2M+K]^+$                                    | 449.0831       | 449.0755 | 1.04                                | -16.92                       |
| $[3M+Na]^+$                                   | 638.1691       | 638.1685 | 2.99                                | -0.94                        |
| $[3M+K]^+$                                    | 654.1431       | 654.1346 | 3.68                                | -12.99                       |

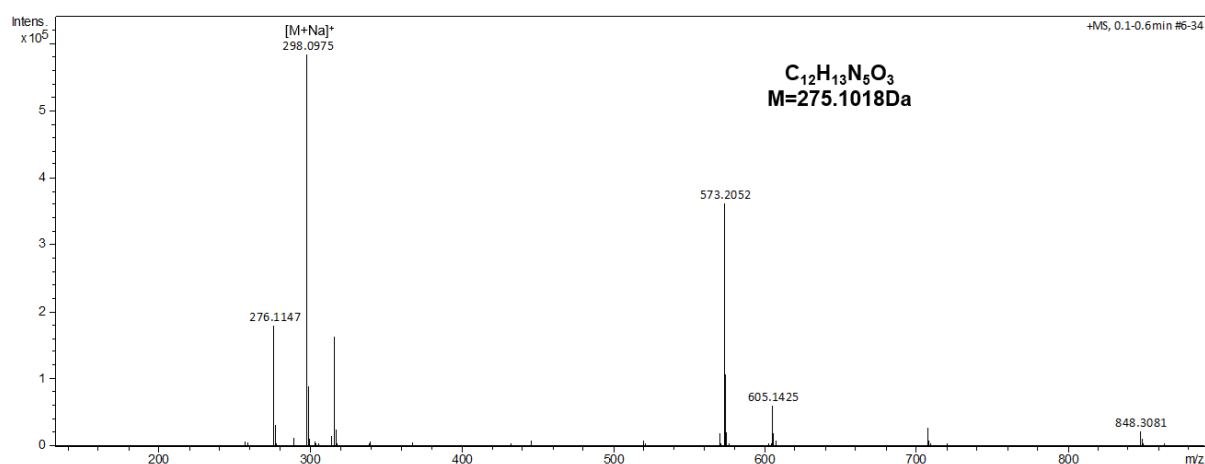

**Figure S2.** ESI-MS spectrum of compound **3**.

**Table S3.** Analysis of other quasi-parent molecular ions of compound **3**.

| Other quasi-parent molecular ions of <b>3</b> | Calculated m/z | Found    |                                     |
|-----------------------------------------------|----------------|----------|-------------------------------------|
|                                               |                | m/z      | Relative intensity (%) to base peak |
| $[M+H]^+$                                     | 276.1091       | 276.1147 | 30.89                               |
| $[M+K]^+$                                     | 314.0650       | 314.0708 | 2.55                                |
| $[M+H_2O+Na]^+$                               | 316.1016       | 316.1079 | 27.80                               |
| $[2M+Na]^+$                                   | 573.1929       | 573.2052 | 61.78                               |
| $[2M+CH_3OH+Na]^+$                            | 605.2191       | 605.1425 | 10.27                               |
| $[3M+Na]^+$                                   | 848.2947       | 848.3081 | 3.69                                |

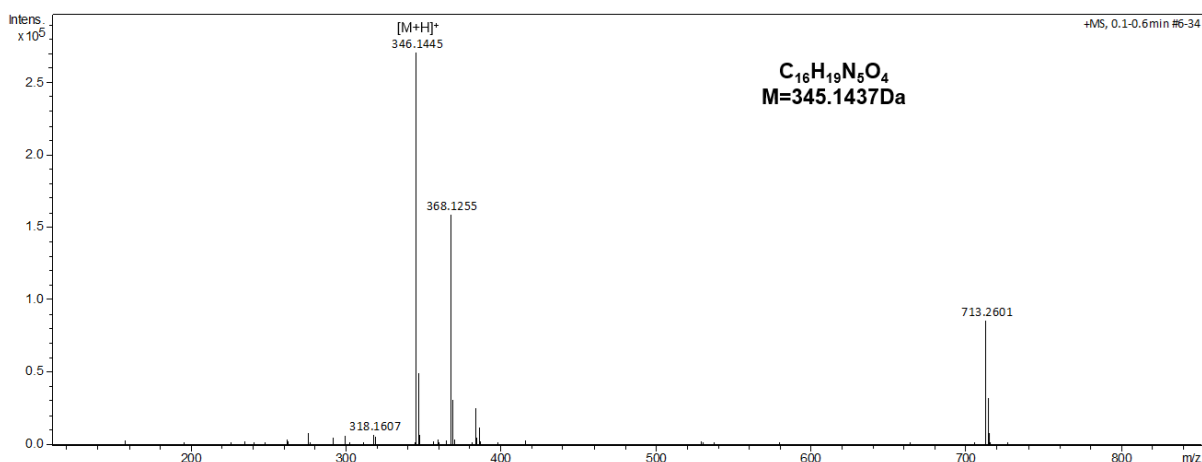

**Figure S3.** ESI-MS spectrum of compound **4**.

**Table S4.** Analysis of other quasi-parent molecular ions of compound **4**.

| Other quasi-parent molecular ions of <b>4</b> | Calculated m/z | Found    |                                     |
|-----------------------------------------------|----------------|----------|-------------------------------------|
|                                               |                | m/z      | Relative intensity (%) to base peak |
| $[M-CO+H]^+$                                  | 318.1561       | 318.1607 | 2.72                                |
| $[M+Na]^+$                                    | 368.1329       | 368.1255 | 58.77                               |
| $[M+K]^+$                                     | 384.1069       | 384.0990 | 9.25                                |
| $[2M+Na]^+$                                   | 713.2766       | 713.2601 | 31.64                               |

## Analysis and Visualizations of Electrospray Mass Ionization (ESI) spectra of the compounds **5a-5l**

**Table S5.** Comparative set of masses of quasi-parent molecular  $[M+H]^+$  ions (as base peaks) of the compounds **5a-5l**. Errors associated with mass measurements of the compounds **5a-5l**.

| No.                  | Calculated m/z for $[M+H]^+$ ion | Found m/z for $[M+H]^+$ ion (percentage relative intensity) | Mass measurement error (ppm) |
|----------------------|----------------------------------|-------------------------------------------------------------|------------------------------|
| <b>5a</b>            | 261.1094                         | 261.1081 (100%)                                             | -4.98                        |
| <b>5b</b>            | 275.1251                         | 275.1246 (100%)                                             | -1.82                        |
| <b>5c</b> (method A) | 289.1408                         | 289.1407 (100%)                                             | -0.35                        |
| <b>5c</b> (method B) | 289.1408                         | 289.1454 (100%)                                             | 15.91                        |
| <b>5d</b>            | 303.1564                         | 303.1556 (100%)                                             | -2.64                        |
| <b>5e</b>            | 317.1720                         | 317.1717 (100%)                                             | -0.95                        |
| <b>5f</b>            | 291.1200                         | 291.1195 (100%)                                             | -1.72                        |
| <b>5g</b>            | 305.1357                         | 305.1352 (100%)                                             | -1.64                        |
| <b>5h</b>            | 360.1779                         | 360.1768 (100%)                                             | -3.05                        |
| <b>5i</b> (method A) | 332.1829                         | 332.1821 (100%)                                             | -2.41                        |
| <b>5i</b> (method B) | 332.1829                         | 332.1824 (100%)                                             | -1.51                        |
| <b>5i</b> (method C) | 332.1829                         | 332.1848 (100%)                                             | 5.72                         |
| <b>5j</b>            | 318.1673                         | 318.1664 (100%)                                             | -2.83                        |
| <b>5k</b>            | 289.1408                         | 289.1396 (100%)                                             | -4.15                        |
| <b>5l</b>            | 329.1720                         | 329.1706 (100%)                                             | -4.25                        |

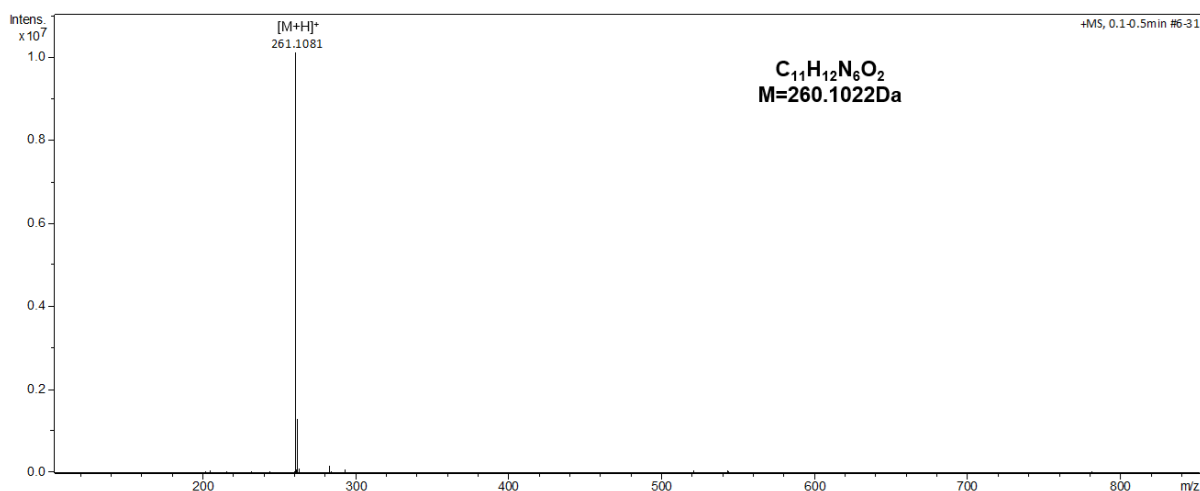

**Figure S4.** HR-ESI-MS spectrum of compound **5a**.

**Table S6.** Analysis of other quasi-parent molecular ions of compound **5a**.

| Other quasi-parent molecular ions of <b>5a</b> | Calculated m/z | Found    |                                     | Mass measurement error (ppm) |
|------------------------------------------------|----------------|----------|-------------------------------------|------------------------------|
|                                                |                | m/z      | Relative intensity (%) to base peak |                              |
| $[M+Na]^+$                                     | 283.0914       | 283.0904 | 1.54                                | -3.53                        |
| $[M+CH_3OH+H]^+$                               | 293.1357       | 293.1344 | 0.91                                | -4.43                        |
| $[2M+Na]^+$                                    | 543.1936       | 543.1927 | 0.57                                | -1.66                        |

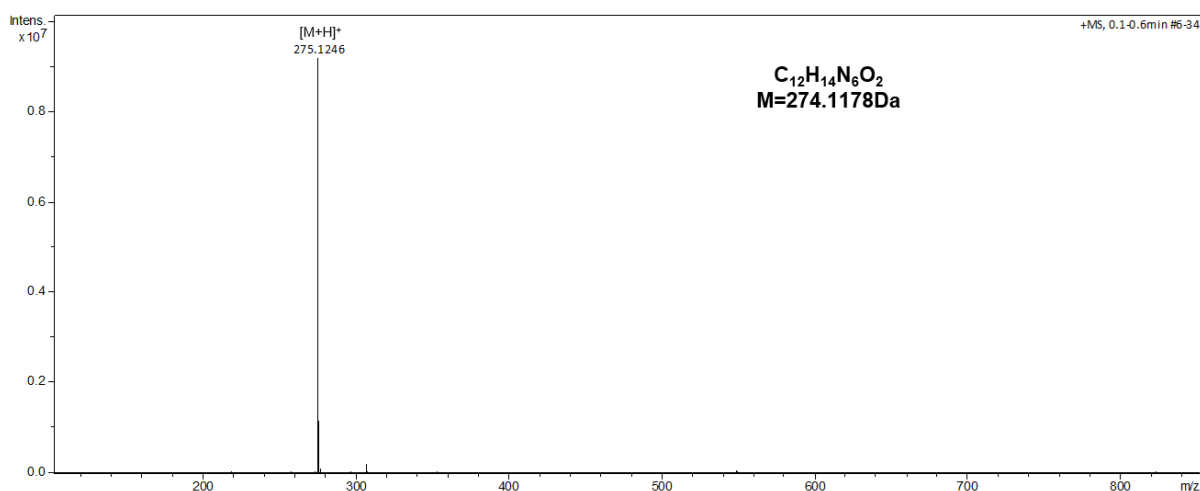

**Figure S5.** HR-ESI-MS spectrum of compound **5b**.

**Table S7.** Analysis of other quasi-parent molecular ions of compound **5b**.

| Other quasi-parent molecular ions of <b>5b</b> | Calculated m/z | Found    |                                     | Mass measurement error (ppm) |
|------------------------------------------------|----------------|----------|-------------------------------------|------------------------------|
|                                                |                | m/z      | Relative intensity (%) to base peak |                              |
| $[M+CH_3OH+H]^+$                               | 307.1513       | 307.1511 | 2.26                                | -0.65                        |

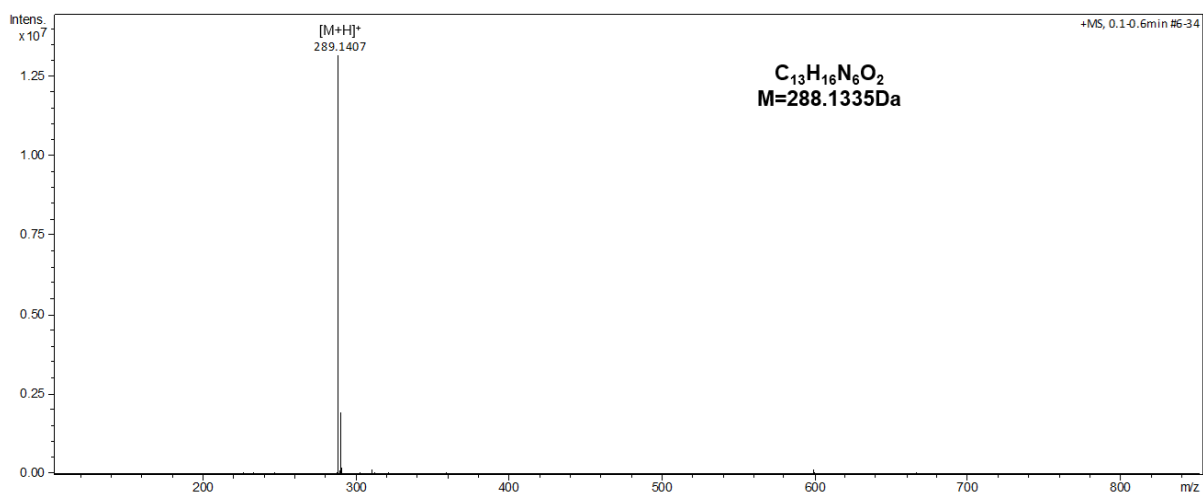

**Figure S6.** HR-ESI-MS spectrum of compound **5c** (method A).

**Table S8.** Analysis of other quasi-parent molecular ions of compound **5c** (method A).

| Other quasi-parent molecular ions of <b>5c</b> | Calculated m/z | Found    |                                     | Mass measurement error (ppm) |
|------------------------------------------------|----------------|----------|-------------------------------------|------------------------------|
|                                                |                | m/z      | Relative intensity (%) to base peak |                              |
| $[M+Na]^+$                                     | 311.1227       | 311.1233 | 1.19                                | 1.93                         |
| $[M+CH_3OH+H]^+$                               | 321.1669       | 321.1674 | 0.29                                | 1.56                         |
| $[2M+Na]^+$                                    | 599.2562       | 599.2584 | 1.16                                | 3.67                         |

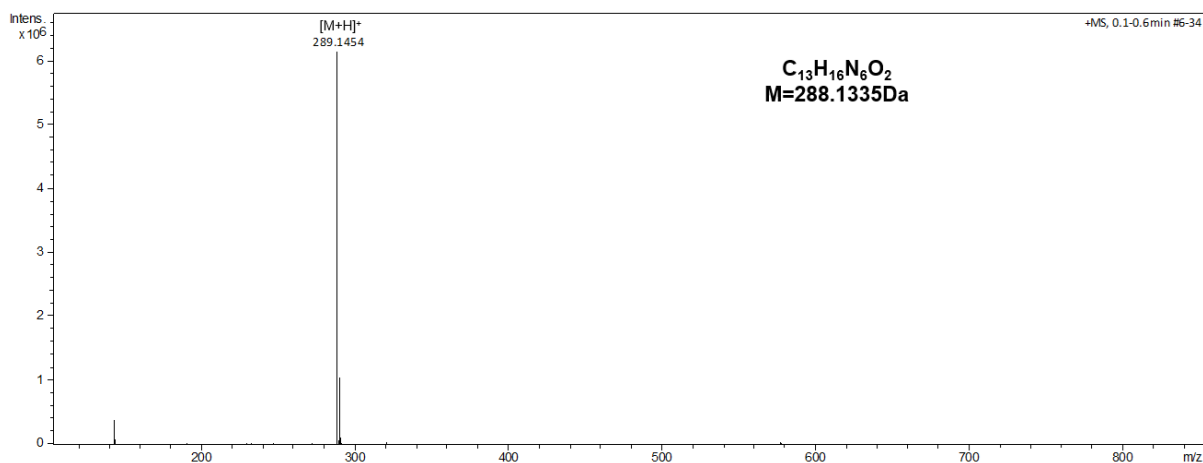

**Figure S7.** ESI-MS spectrum of compound **5c** (method B).

**Table S9.** Analysis of other quasi-parent molecular ions of compound **5c** (method B).

| Other quasi-parent molecular ions of <b>5c</b> | Calculated m/z | Found    |                                     |
|------------------------------------------------|----------------|----------|-------------------------------------|
|                                                |                | m/z      | Relative intensity (%) to base peak |
| $[M+CH_3OH+H]^+$                               | 321.1669       | 321.1710 | 0.62                                |
| $[2M+H]^+$                                     | 577.2742       | 577.2820 | 0.61                                |



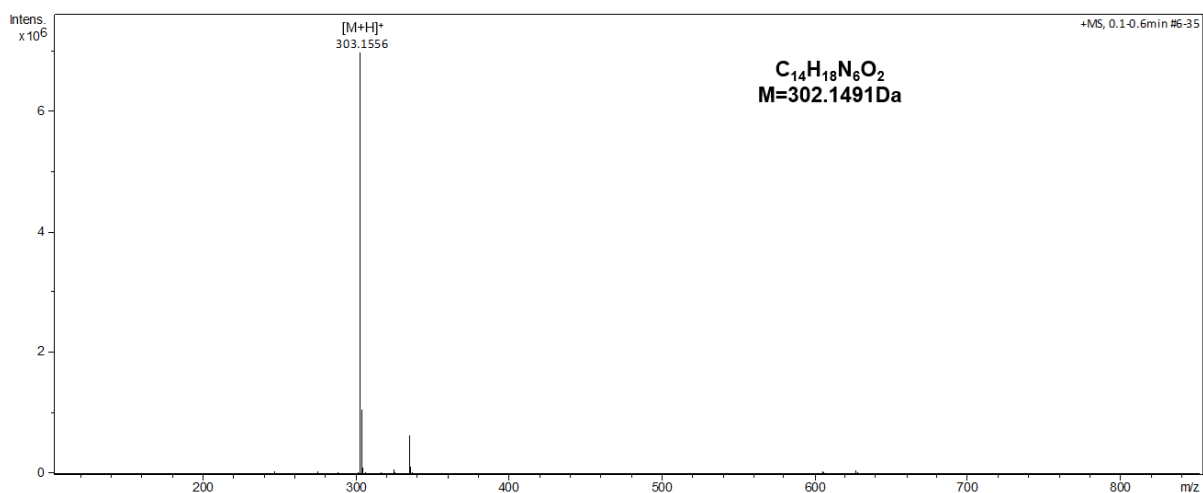

**Figure S8.** HR-ESI-MS spectrum of compound **5d**.

**Table S10.** Analysis of other quasi-parent molecular ions of compound **5d**.

| Other quasi-parent molecular ions of <b>5d</b> | Calculated m/z | Found    |                                     | Mass measurement error (ppm) |
|------------------------------------------------|----------------|----------|-------------------------------------|------------------------------|
|                                                |                | m/z      | Relative intensity (%) to base peak |                              |
| $[M+Na]^+$                                     | 325.1383       | 325.1376 | 0.99                                | -2.15                        |
| $[M+CH_3OH+H]^+$                               | 335.1826       | 335.1825 | 9.11                                | -0.30                        |

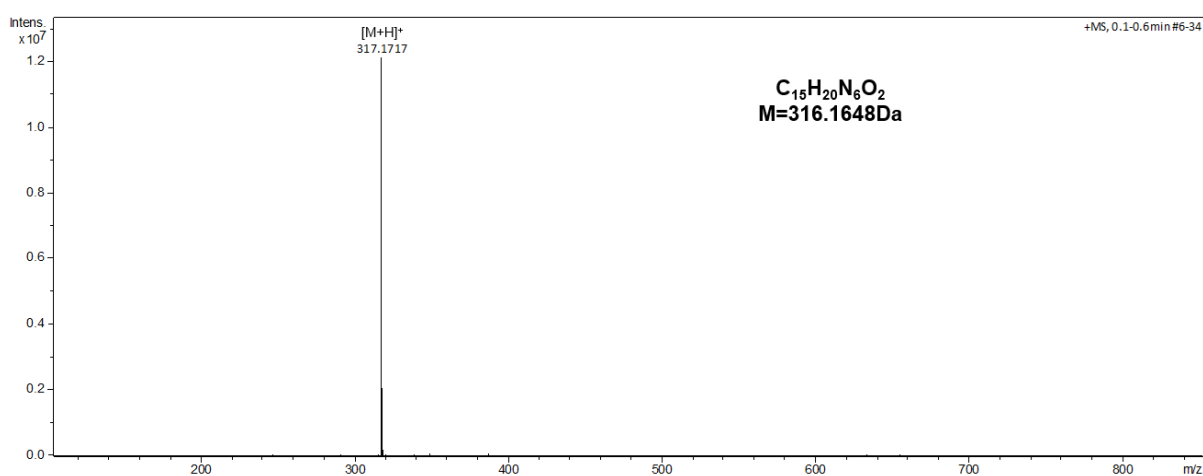

**Figure S9.** HR-ESI-MS spectrum of compound **5e**.

**Table S11.** Analysis of other quasi-parent molecular ions of compound **5e**.

| Other quasi-parent molecular ions of <b>5e</b> | Calculated m/z | Found    |                                     | Mass measurement error (ppm) |
|------------------------------------------------|----------------|----------|-------------------------------------|------------------------------|
|                                                |                | m/z      | Relative intensity (%) to base peak |                              |
| $[M+Na]^+$                                     | 339.1540       | 339.1535 | 0.17                                | -1.47                        |
| $[M+CH_3OH+H]^+$                               | 349.1982       | 349.1977 | 0.51                                | -1.43                        |
| $[2M+H]^+$                                     | 633.3368       | 633.3373 | 0.26                                | 0.79                         |
| $[2M+Na]^+$                                    | 655.3188       | 655.3195 | 0.23                                | 1.07                         |

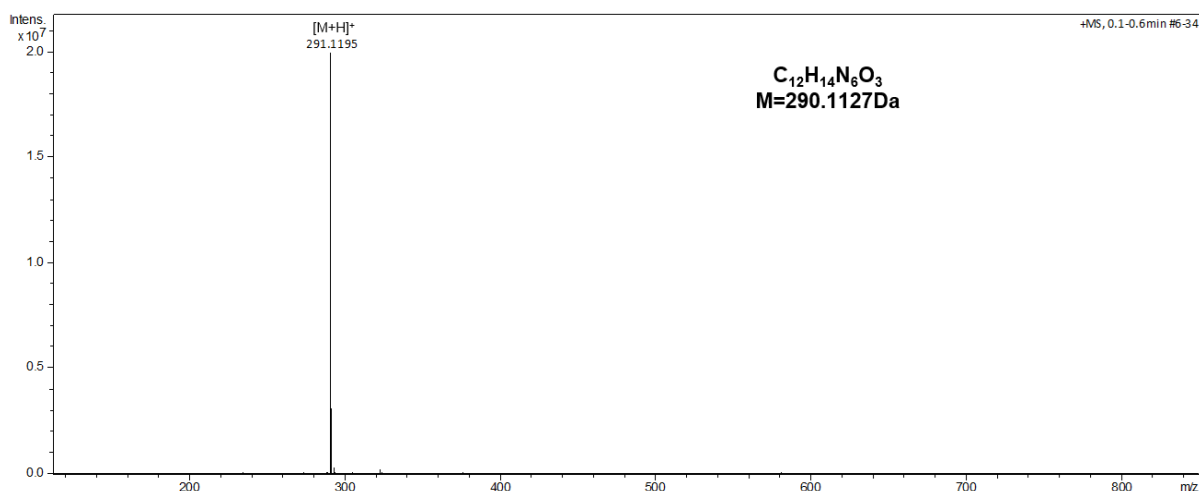

**Figure S10.** HR-ESI-MS spectrum of compound **5f**.

**Table S12.** Analysis of other quasi-parent molecular ions of compound **5f**.

| Other quasi-parent molecular ions of <b>5f</b> | Calculated m/z | Found    |                                     | Mass measurement error (ppm) |
|------------------------------------------------|----------------|----------|-------------------------------------|------------------------------|
|                                                |                | m/z      | Relative intensity (%) to base peak |                              |
| $[M+CH_3OH+H]^+$                               | 323.1462       | 323.1463 | 1.00                                | 0.31                         |
| $[2M+H]^+$                                     | 633.3368       | 633.3372 | 1.52                                | 0.63                         |

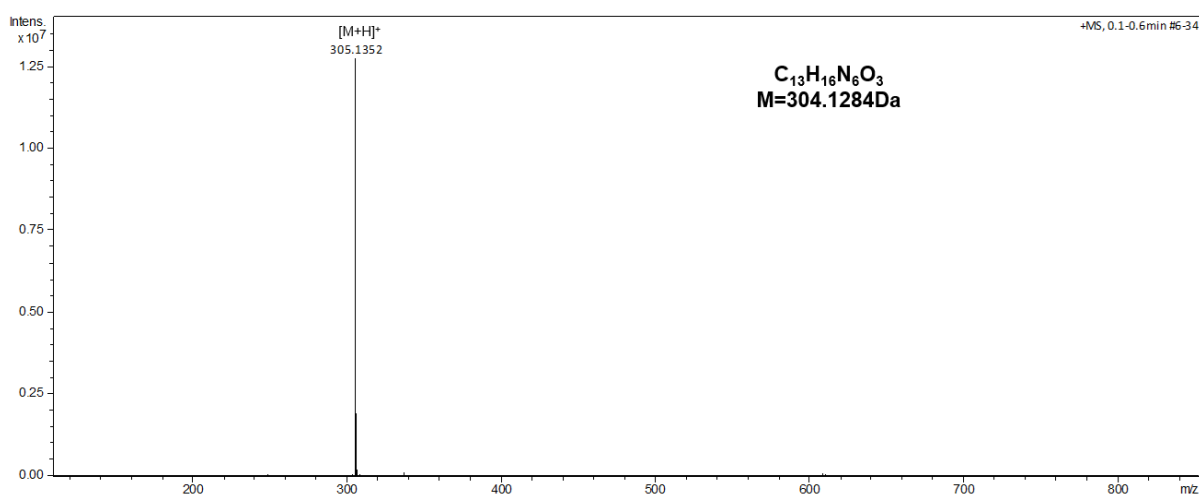

**Figure S11.** HR-ESI-MS spectrum of compound **5g**.

**Table S13.** Analysis of other quasi-parent molecular ions of compound **5g**.

| Other quasi-parent molecular ions of <b>5g</b> | Calculated m/z | Found    |                                     | Mass measurement error (ppm) |
|------------------------------------------------|----------------|----------|-------------------------------------|------------------------------|
|                                                |                | m/z      | Relative intensity (%) to base peak |                              |
| $[M+CH_3OH+H]^+$                               | 337.1619       | 337.1620 | 0.75                                | 0.30                         |

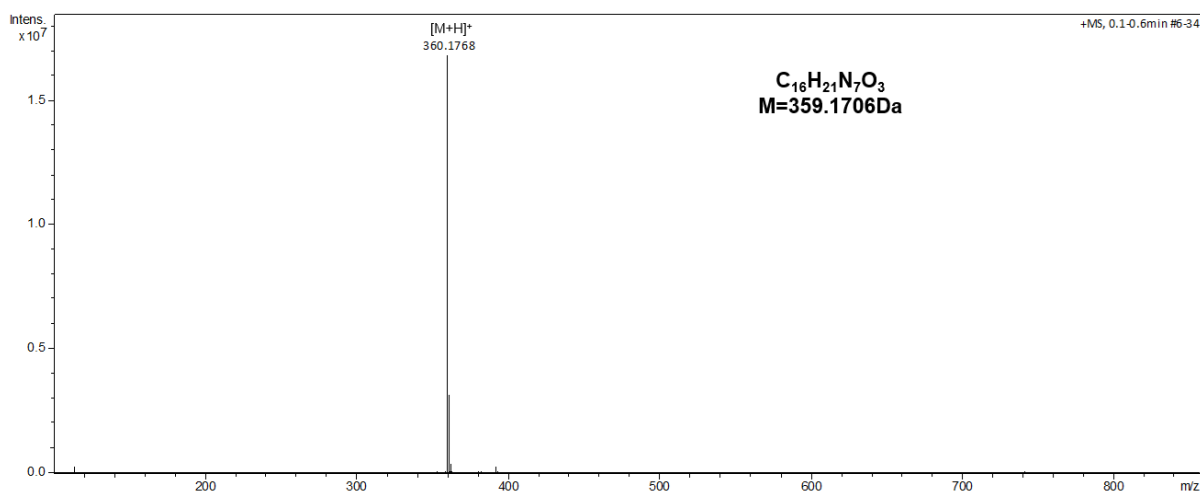

**Figure S12.** HR-ESI-MS spectrum of compound **5h**.

**Table S14.** Analysis of other quasi-parent molecular ions of compound **5h**.

| Other quasi-parent molecular ions of <b>5h</b> | Calculated m/z | Found    |                                     | Mass measurement error (ppm) |
|------------------------------------------------|----------------|----------|-------------------------------------|------------------------------|
|                                                |                | m/z      | Relative intensity (%) to base peak |                              |
| $[M+Na]^+$                                     | 382.1598       | 382.1594 | 0.12                                | -1.05                        |
| $[M+CH_3OH+H]^+$                               | 392.2041       | 392.2041 | 2.02                                | 0.00                         |

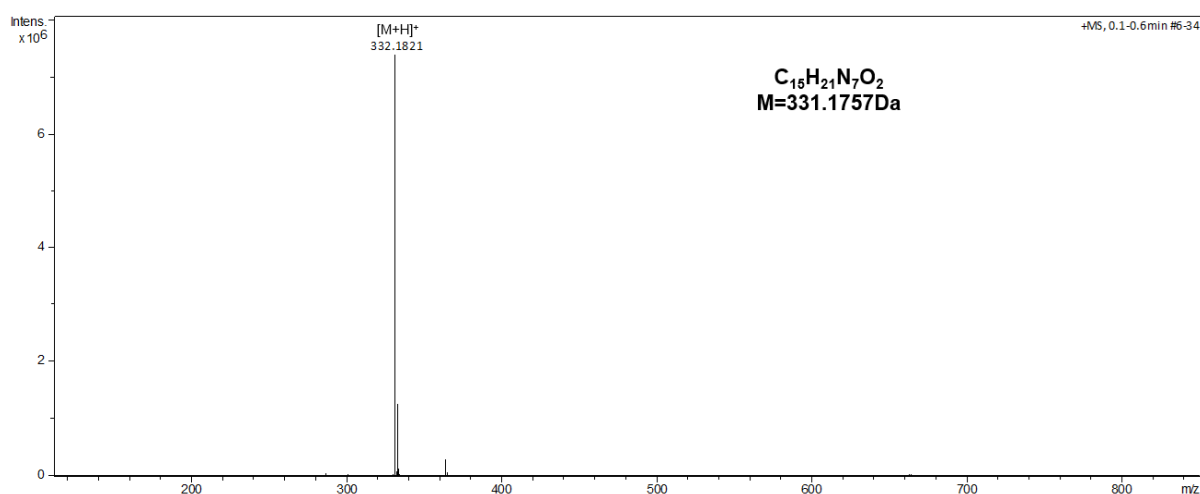

**Figure S13.** HR-ESI-MS spectrum of compound **5i** (method A).

**Table S15.** Analysis of other quasi-parent molecular ions of compound **5i** (method A).

| Other quasi-parent molecular ions of <b>5i</b> | Calculated m/z | Found    |                                     | Mass measurement error (ppm) |
|------------------------------------------------|----------------|----------|-------------------------------------|------------------------------|
|                                                |                | m/z      | Relative intensity (%) to base peak |                              |
| $[M+CH_3OH+H]^+$                               | 364.2092       | 364.2089 | 3.95                                | -0.82                        |

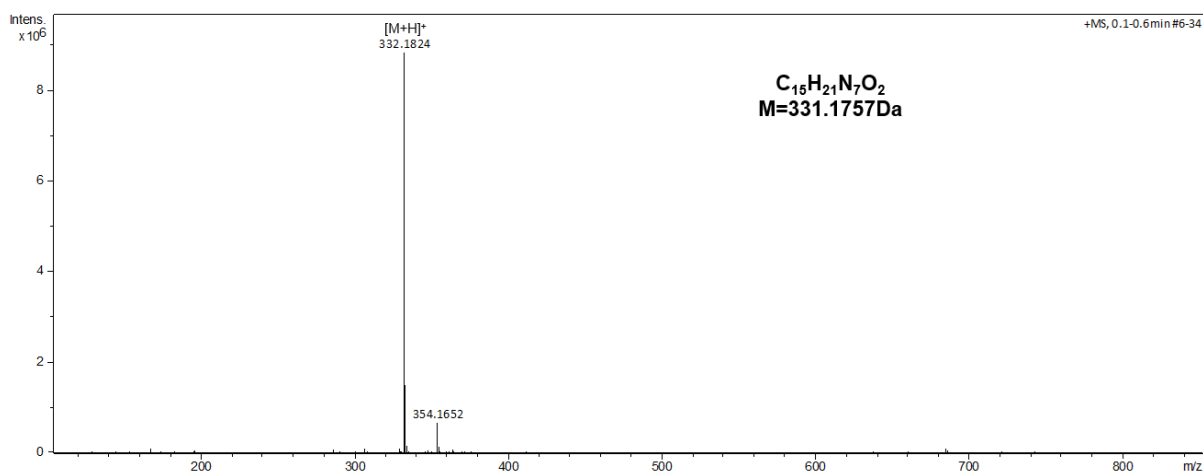

**Figure S14.** HR-ESI-MS spectrum of compound **5i** (method B).

**Table S16.** Analysis of other quasi-parent molecular ions of compound **5i** (method B).

| Other quasi-parent molecular ions of <b>5i</b> | Calculated m/z | Found    |                                     | Mass measurement error (ppm) |
|------------------------------------------------|----------------|----------|-------------------------------------|------------------------------|
|                                                |                | m/z      | Relative intensity (%) to base peak |                              |
| $[M+Na]^+$                                     | 354.1649       | 354.1652 | 7.50                                | 0.85                         |
| $[M+CH_3OH+H]^+$                               | 364.2092       | 364.2085 | 0.81                                | -1.92                        |

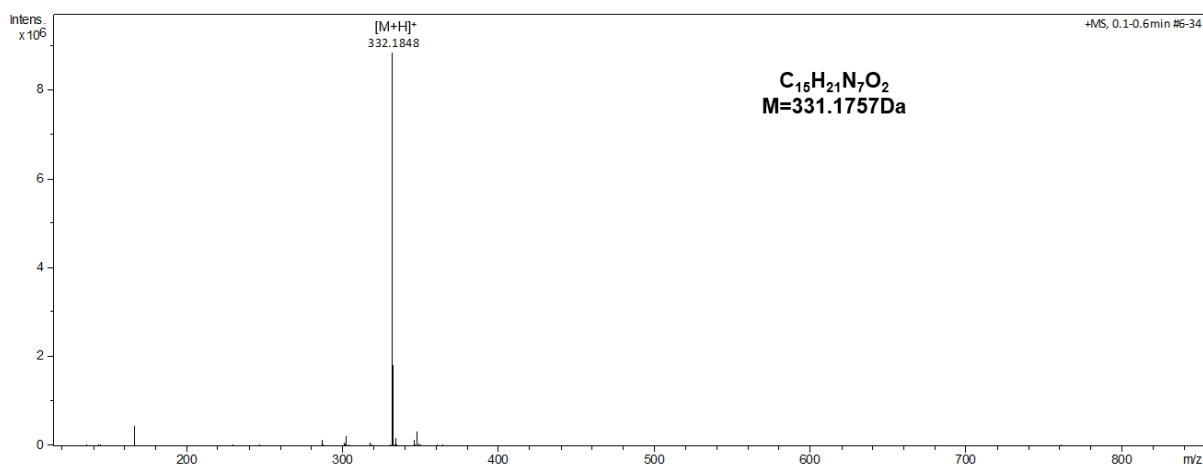

**Figure S15.** ESI-MS spectrum of compound **5i** (method C).

**Table S17.** Analysis of other quasi-parent molecular ions of compound **5i** (method C).

| Other quasi-parent molecular ions of <b>5i</b> | Calculated m/z | Found    |                                     |
|------------------------------------------------|----------------|----------|-------------------------------------|
|                                                |                | m/z      | Relative intensity (%) to base peak |
| $[M+2H]^{2+}$                                  | 166.5951       | 166.5949 | 5.06                                |

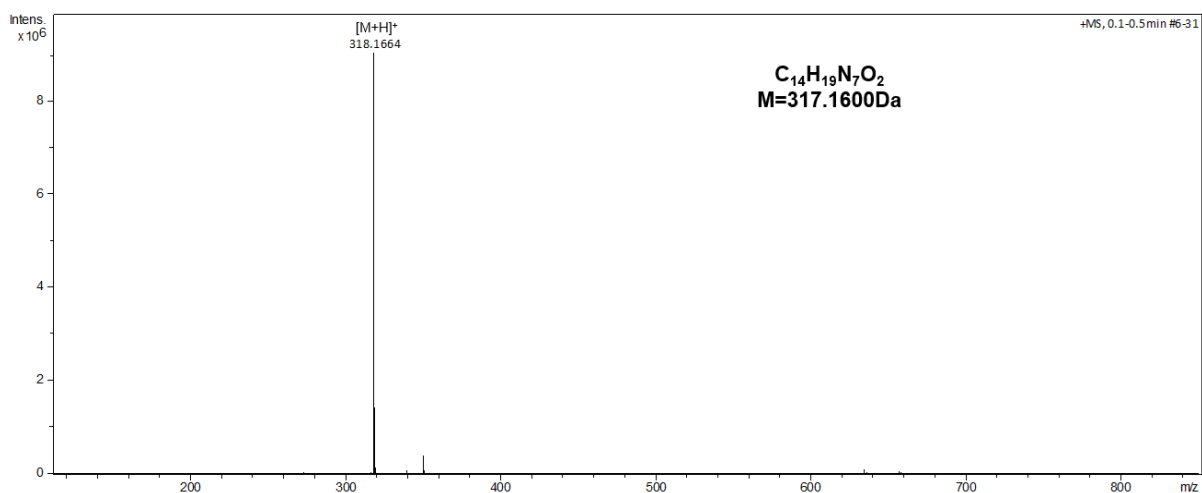

**Figure S16.** HR-ESI-MS spectrum of compound **5j**.

**Table S18.** Analysis of other quasi-parent molecular ions of compound **5j**.

| Other quasi-parent molecular ions of <b>5j</b> | Calculated m/z | Found    |                                     | Mass measurement error (ppm) |
|------------------------------------------------|----------------|----------|-------------------------------------|------------------------------|
|                                                |                | m/z      | Relative intensity (%) to base peak |                              |
| $[M+Na]^+$                                     | 340.1492       | 340.1487 | 0.70                                | -1.47                        |
| $[M+CH_3OH+H]^+$                               | 350.1935       | 350.1935 | 4.47                                | 0.00                         |
| $[2M+H]^+$                                     | 635.3273       | 635.3273 | 1.15                                | 0.00                         |
| $[2M+Na]^+$                                    | 657.3093       | 657.3097 | 0.62                                | 0.61                         |

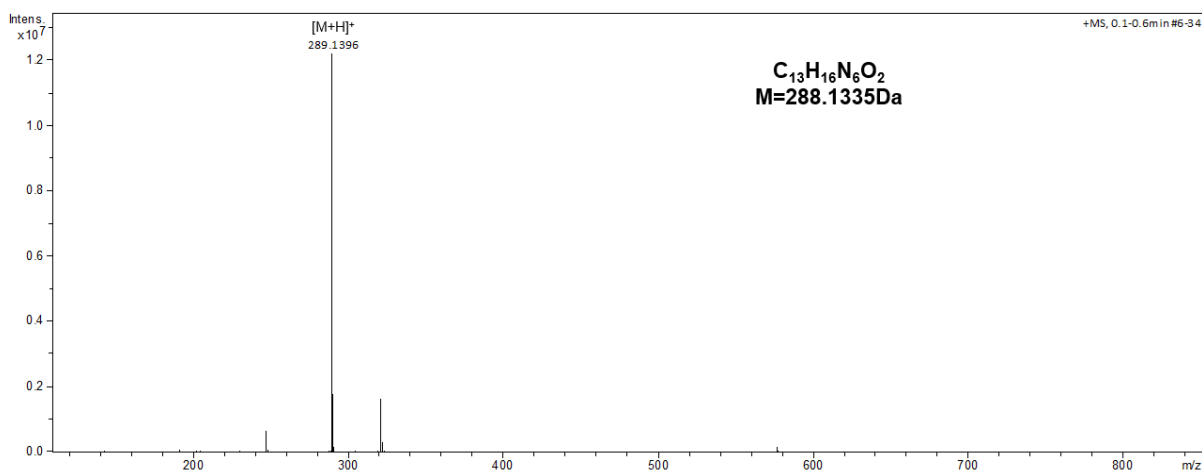

**Figure S17.** HR-ESI-MS spectrum of compound **5k**.

**Table S19.** Analysis of other quasi-parent molecular ions of compound **5k**.

| Other quasi-parent molecular ions of <b>5k</b> | Calculated m/z | Found    |                                     | Mass measurement error (ppm) |
|------------------------------------------------|----------------|----------|-------------------------------------|------------------------------|
|                                                |                | m/z      | Relative intensity (%) to base peak |                              |
| $[M+CH_3OH+H]^+$                               | 321.1670       | 321.1667 | 13.32                               | -0.93                        |
| $[2M+H]^+$                                     | 577.2742       | 577.2742 | 1.03                                | 0.00                         |

**Table S20.** Analysis of fragmentation ion of compound **5k**.

| Fragmentation ion of <b>5k</b>                       | Calculated m/z | Found    |                                     | Mass measurement error (ppm) |
|------------------------------------------------------|----------------|----------|-------------------------------------|------------------------------|
|                                                      |                | m/z      | Relative intensity (%) to base peak |                              |
| $[\text{C}_{10}\text{H}_{11}\text{N}_6\text{O}_2]^+$ | 247.0938       | 247.0937 | 5.30                                | -0.40                        |

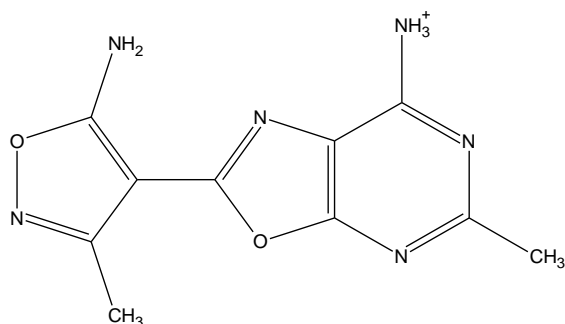**Figure S18.** Structure of  $[\text{C}_{10}\text{H}_{11}\text{N}_6\text{O}_2]^+$  ion from HR-ESI-MS spectrum of compound **5k**.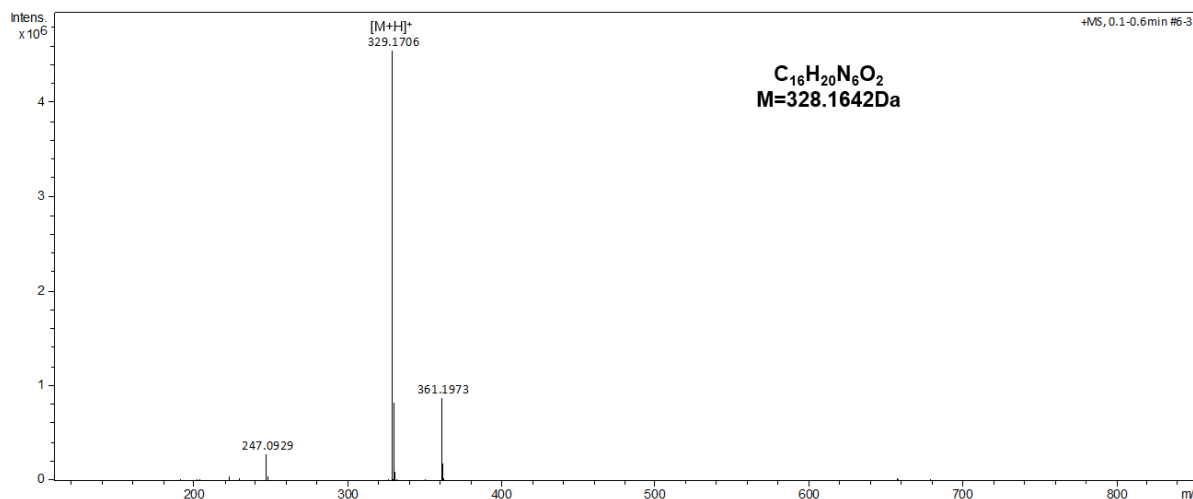**Figure S19.** HR-ESI-MS spectrum of compound **5l**.**Table S21.** Analysis of other quasi-parent molecular ions of compound **5l**.

| Other quasi-parent molecular ions of <b>5l</b> | Calculated m/z | Found    |                                     | Mass measurement error (ppm) |
|------------------------------------------------|----------------|----------|-------------------------------------|------------------------------|
|                                                |                | m/z      | Relative intensity (%) to base peak |                              |
| $[\text{M}+\text{CH}_3\text{OH}+\text{H}]^+$   | 361.1983       | 361.1973 | 19.26                               | -2.77                        |
| $[2\text{M}+\text{H}]^+$                       | 657.3368       | 657.3349 | 0.46                                | -2.89                        |

**Table S22.** Analysis of fragmentation ion of compound **5l**.

| Fragmentation ion of <b>5l</b>                       | Calculated m/z | Found    |                                     | Mass measurement error (ppm) |
|------------------------------------------------------|----------------|----------|-------------------------------------|------------------------------|
|                                                      |                | m/z      | Relative intensity (%) to base peak |                              |
| $[\text{C}_{10}\text{H}_{11}\text{N}_6\text{O}_2]^+$ | 247.0938       | 247.0929 | 6.04                                | -3.64                        |

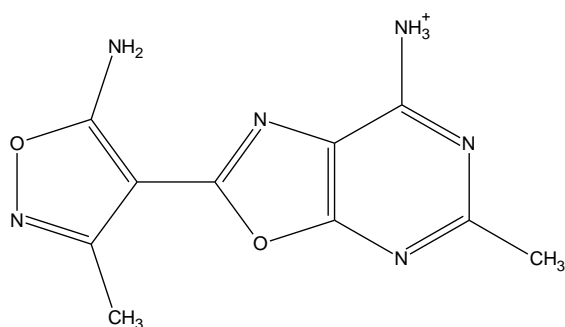

**Figure S20.** Structure of  $[C_{10}H_{11}N_6O_2]^+$  ion from HR-ESI-MS spectrum of compound **5l**.

## Analysis and Visualizations of Electrospray Mass Ionization (ESI) spectra of compound **7m**

**Table S23.** Comparative set of masses of quasi-parent molecular  $[2M+Na]^+$  ion (as base peak) of compound **7m**. Errors associated with mass measurements of compound **7m**.

| No.       | Calculated m/z for $[2M+Na]^+$ ion | Found m/z for base peaks (percentage relative intensity) | Mass measurement error (ppm) |
|-----------|------------------------------------|----------------------------------------------------------|------------------------------|
| <b>7m</b> | 627.2875                           | 627.2885 (100%)                                          | 1.59                         |

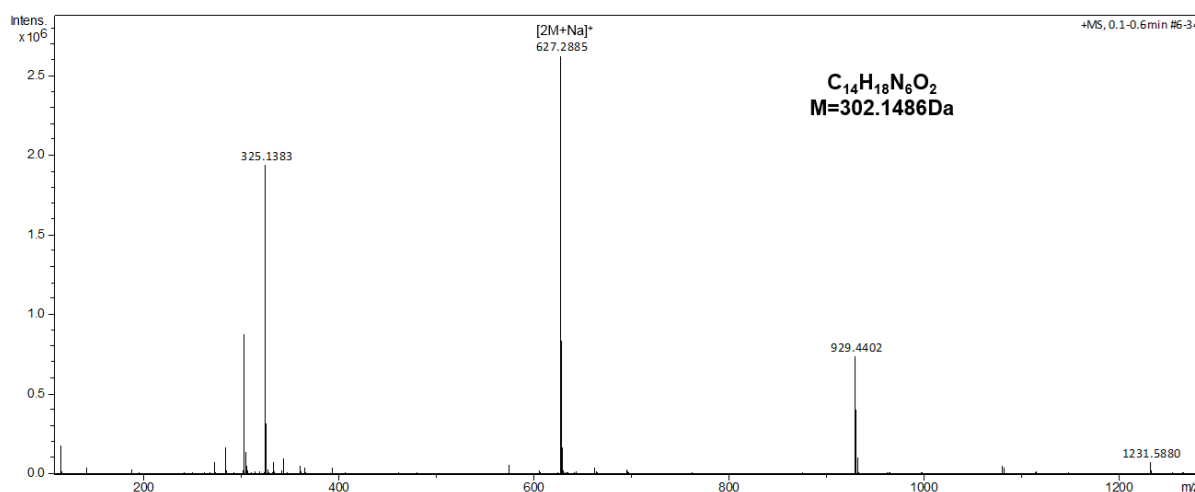

**Figure S21.** HR-ESI-MS spectrum of compound **7m**.

**Table S24.** Analysis of other quasi-parent molecular ions of compound **7m**.

| Other quasi-parent molecular ions of <b>7m</b> | Calculated m/z | Found    |                                     | Mass measurement error (ppm) |
|------------------------------------------------|----------------|----------|-------------------------------------|------------------------------|
|                                                |                | m/z      | Relative intensity (%) to base peak |                              |
| $[M+H]^+$                                      | 303.1564       | 303.1565 | 33.35                               | 0.33                         |
| $[M+Na]^+$                                     | 325.1383       | 325.1383 | 73.80                               | 0.00                         |
| $[M+H_2O+Na]^+$                                | 343.1489       | 343.1482 | 3.67                                | -2.04                        |
| $[3M+Na]^+$                                    | 929.4366       | 929.4402 | 28.05                               | 3.87                         |

## Visualizations of Nuclear magnetic resonance (NMR) and Infrared (IR) spectra of compound 2

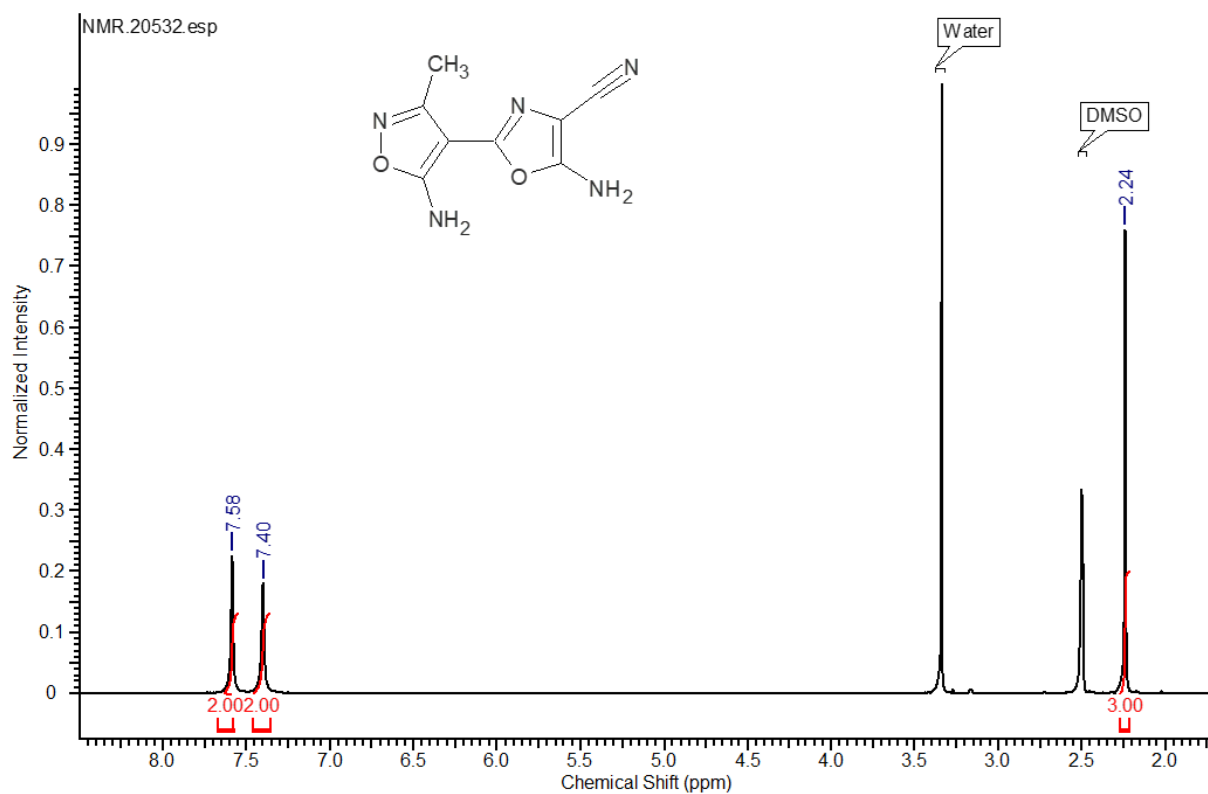

**Figure S22.** <sup>1</sup>H-NMR spectrum of compound 2 in DMSO-d<sub>6</sub>.

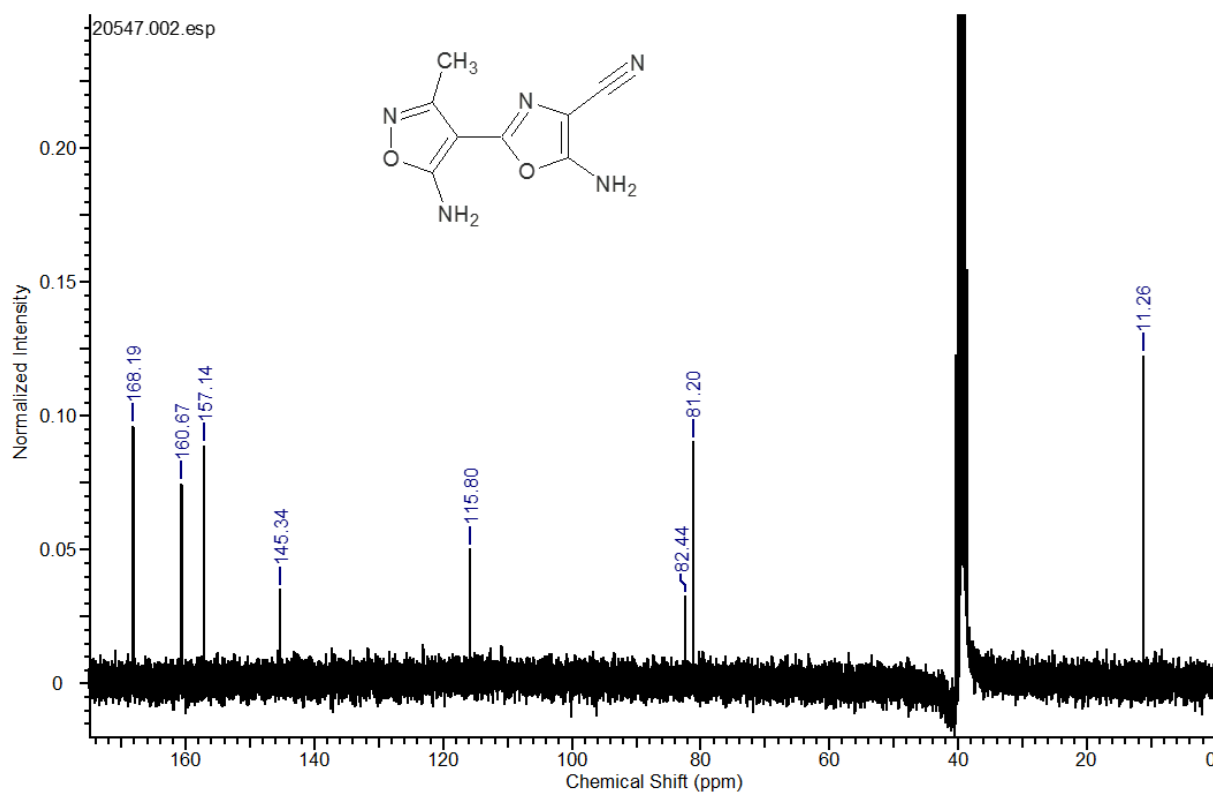

**Figure S23.** <sup>13</sup>C-NMR spectrum of compound 2 in DMSO-d<sub>6</sub>.



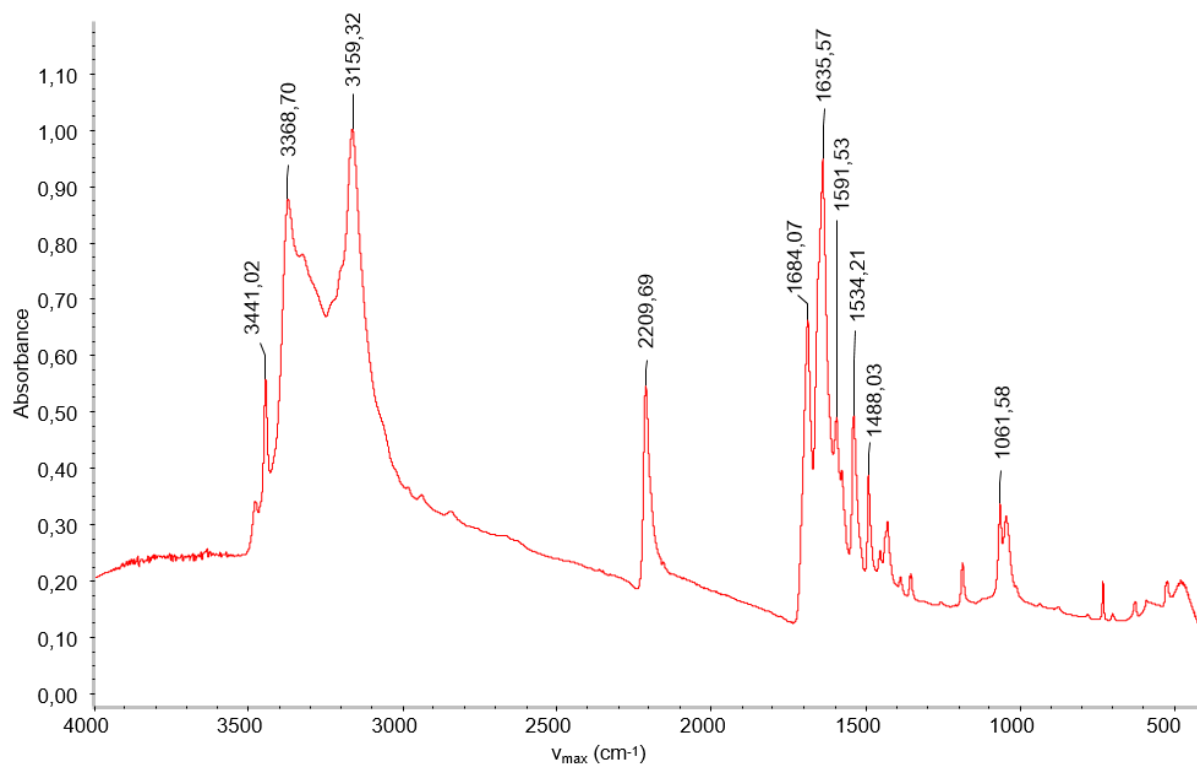

**Figure S24.** ATR-FTIR spectrum of compound 2.

### Visualizations of Nuclear magnetic resonance (NMR) and Infrared (IR) spectra of compound 3

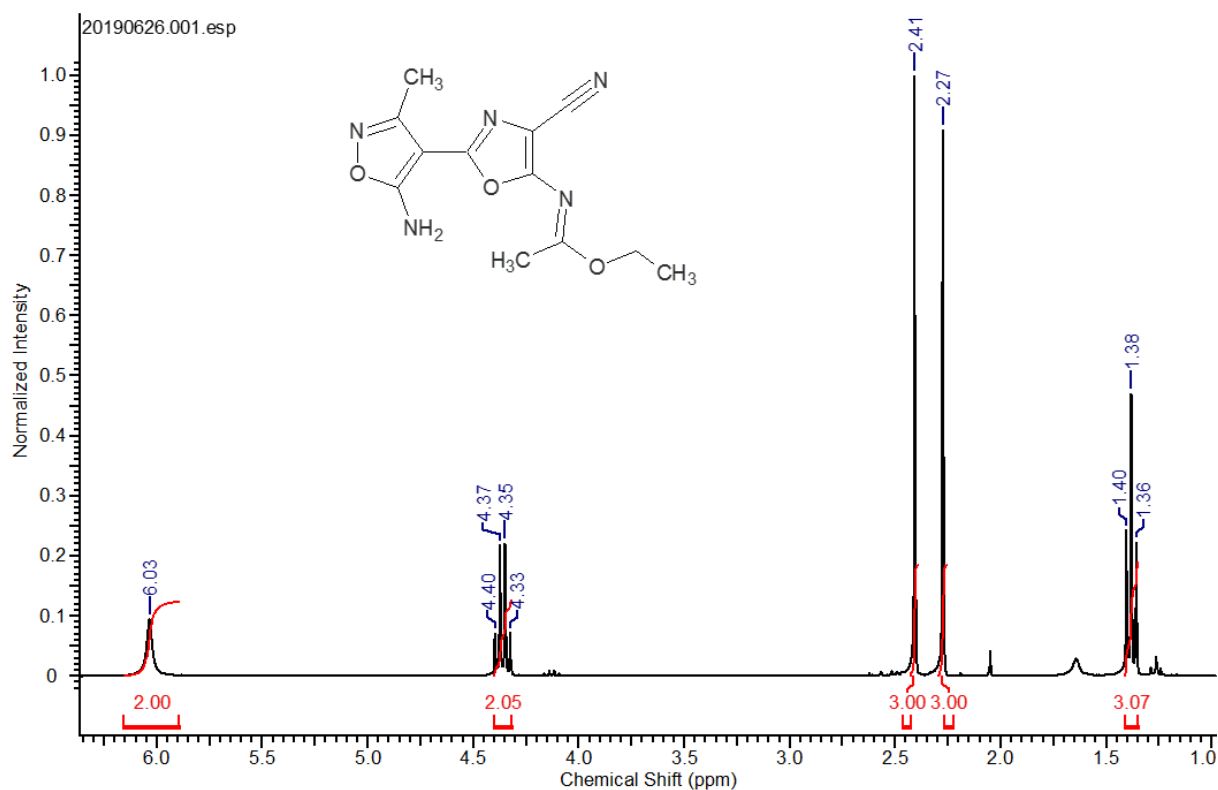

**Figure S25.**  $^1\text{H}$ -NMR spectrum of compound 3 in  $\text{CDCl}_3$ .

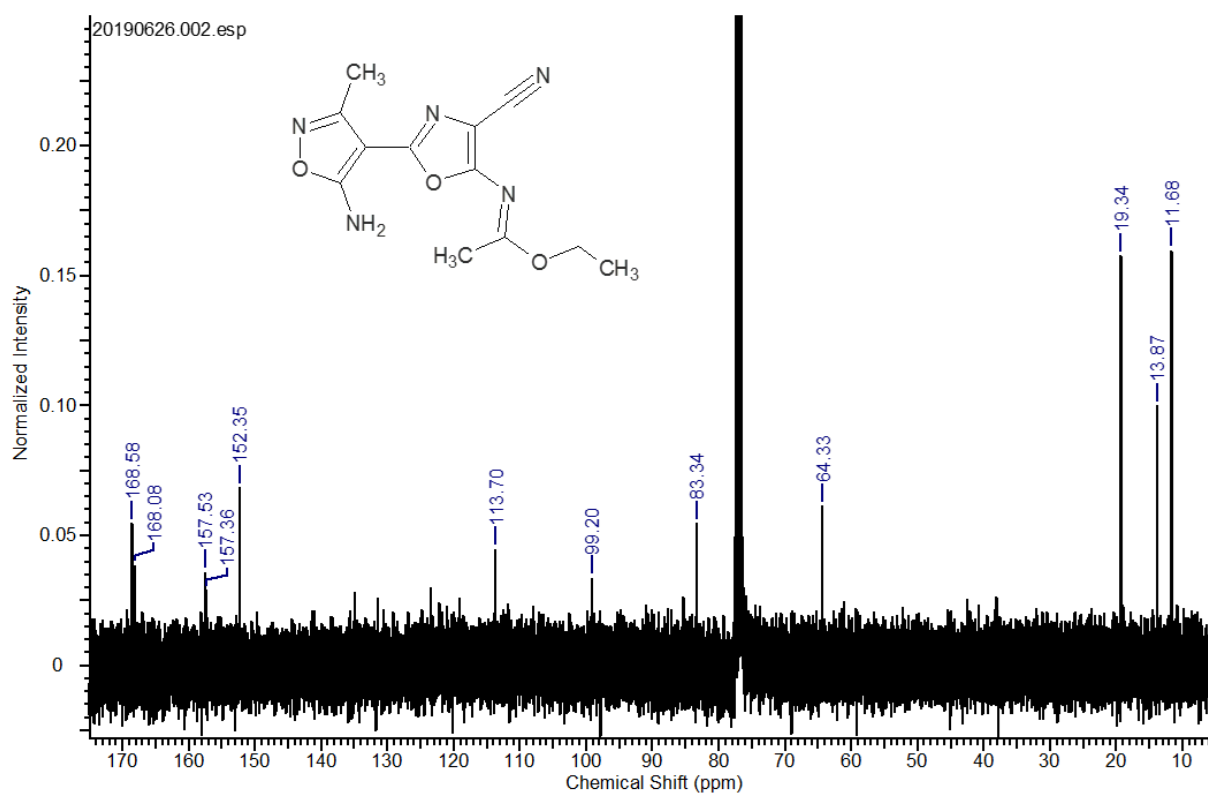

**Figure S26.**  $^{13}\text{C}$ -NMR spectrum of compound **3** in  $\text{CDCl}_3$ .

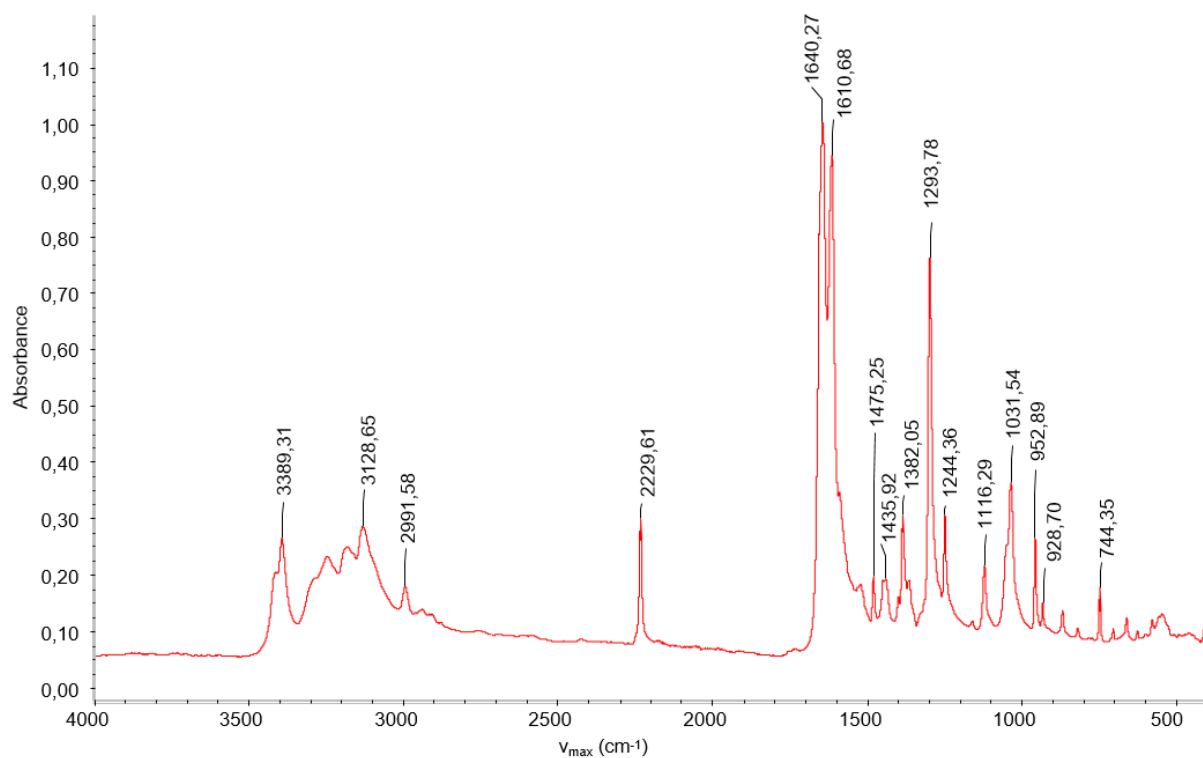

**Figure S27.** ATR-FTIR spectrum of compound **3**.

## Visualizations of Nuclear magnetic resonance (NMR) and Infrared (IR) spectra of compound 4

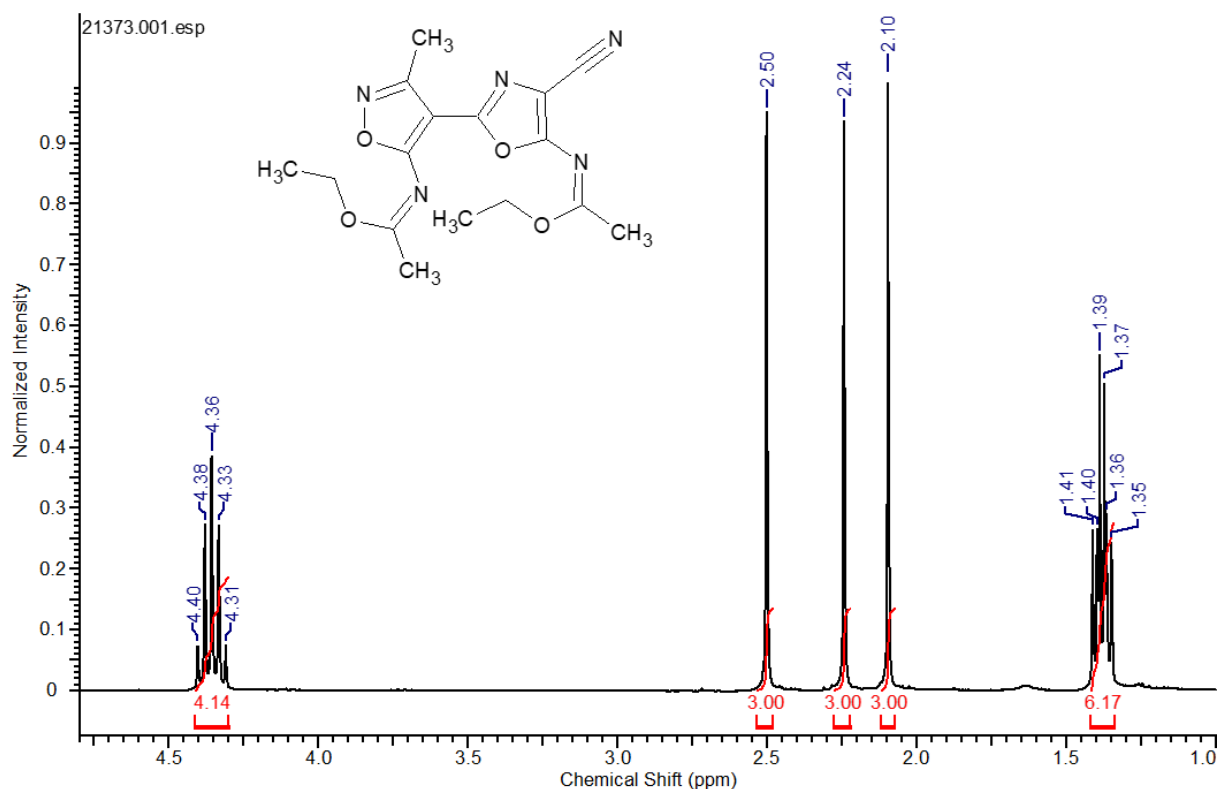

**Figure S28.** <sup>1</sup>H-NMR spectrum of compound 4 in CDCl<sub>3</sub>.

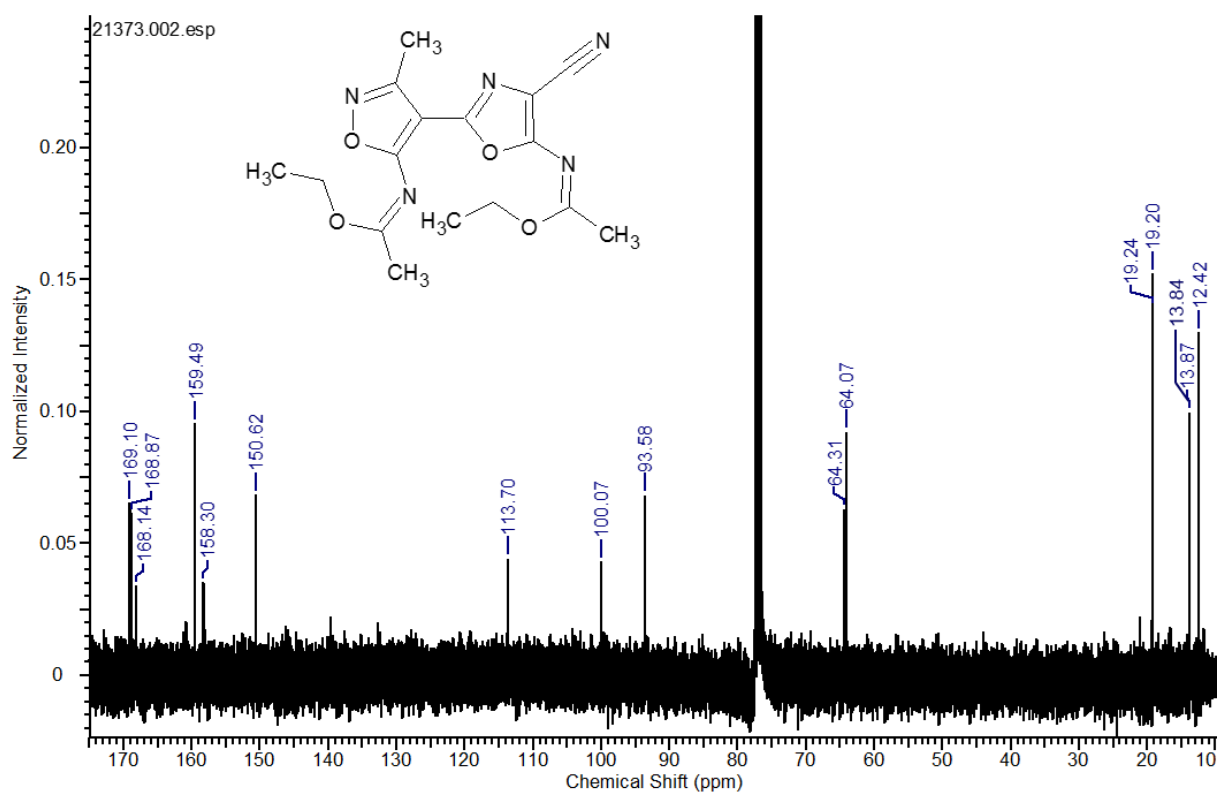

**Figure S29.** <sup>13</sup>C-NMR spectrum of compound 4 in CDCl<sub>3</sub>.

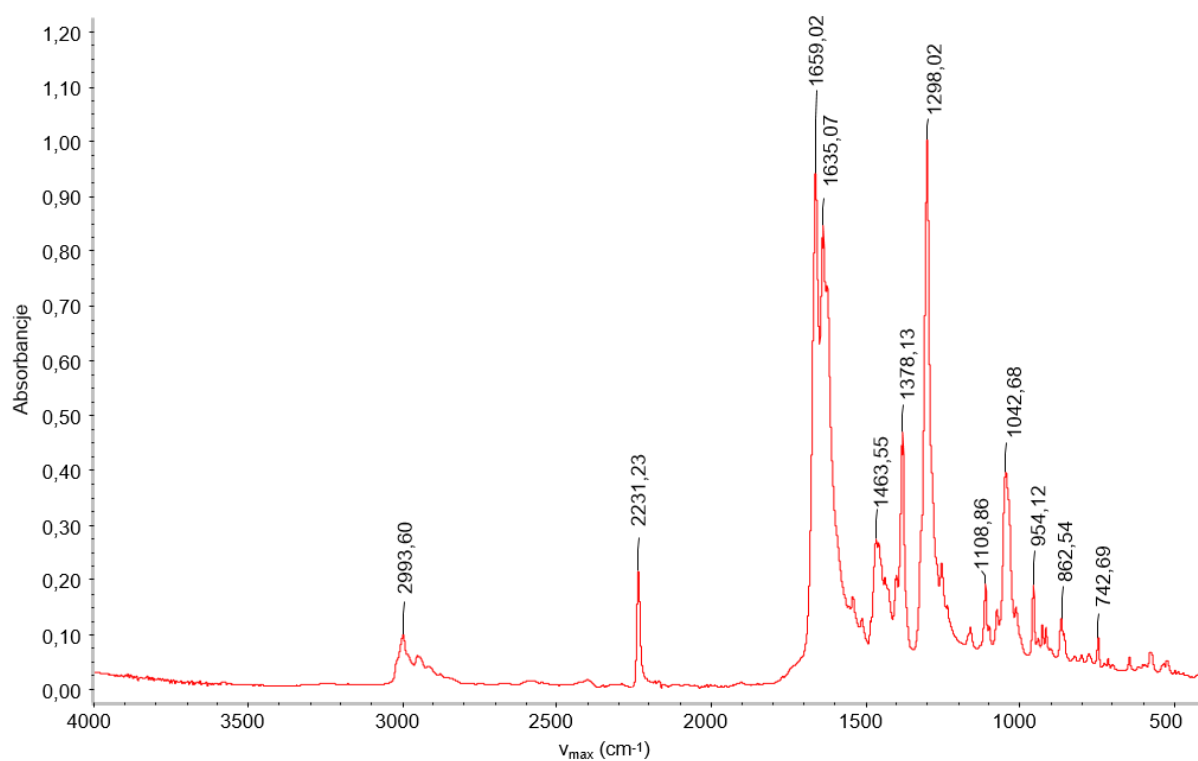

**Figure S30.** ATR-FTIR spectrum of compound **4**.

### Visualizations of Nuclear magnetic resonance (NMR) and Infrared (IR) spectra of compound **5a**

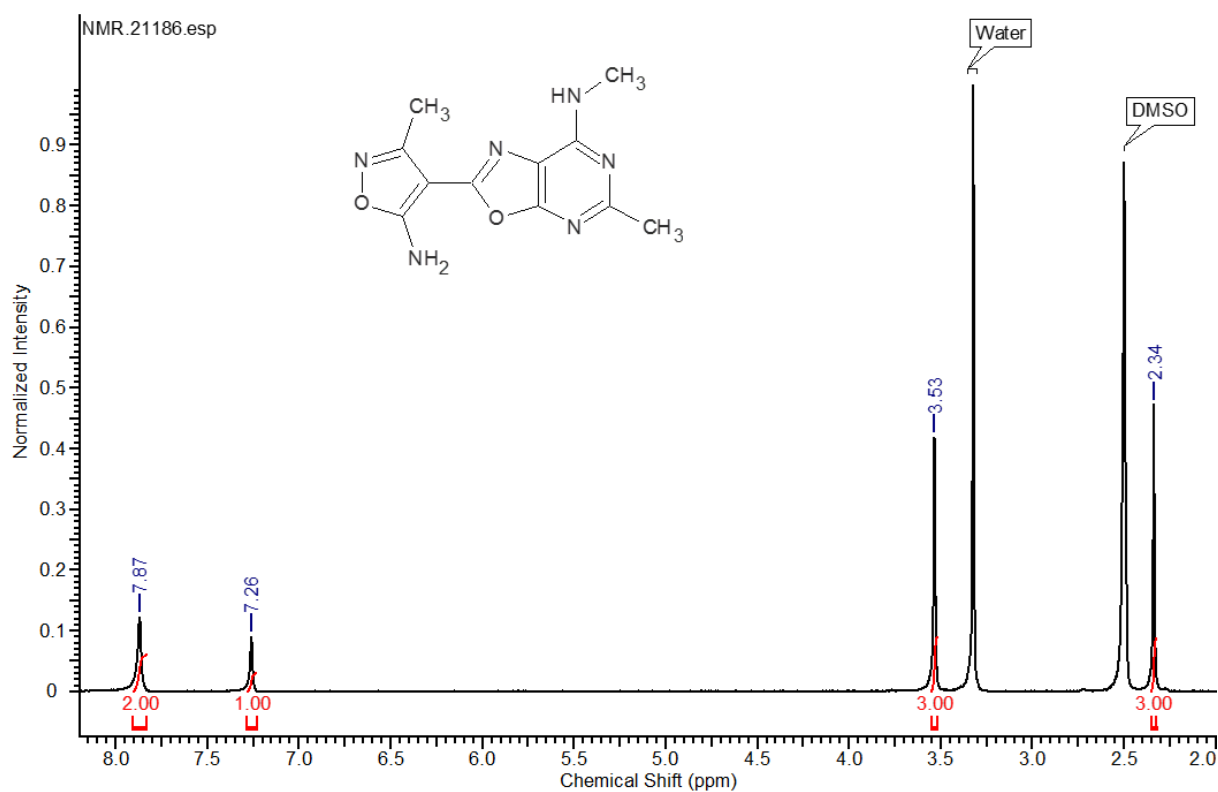

**Figure S31.**  $^1\text{H}$ -NMR spectrum of compound **5a** in DMSO- $d_6$ .

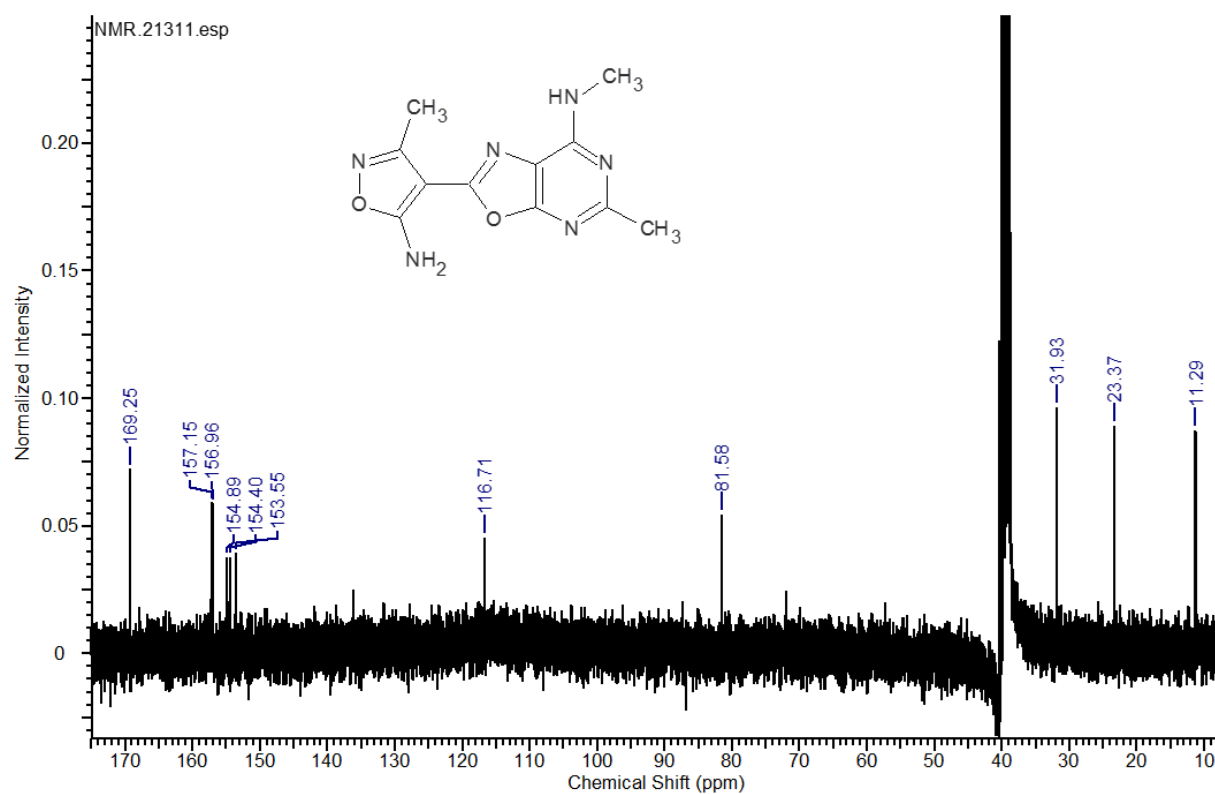

**Figure S32.**  $^{13}\text{C}$ -NMR spectrum of compound **5a** in DMSO-d<sub>6</sub>.

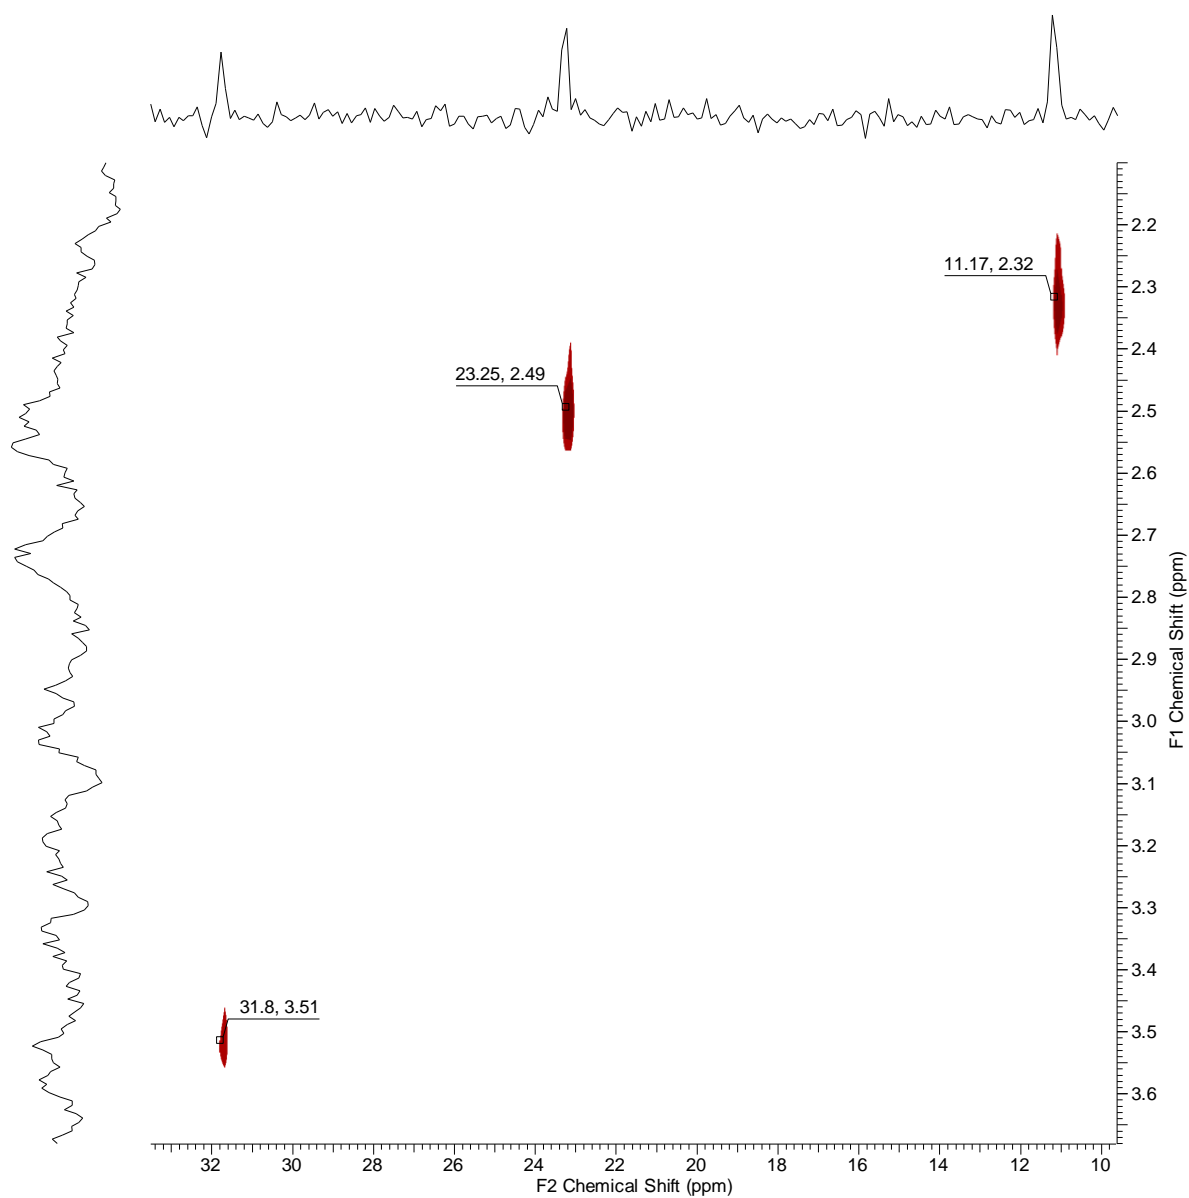

**Figure S33.** <sup>1</sup>H-<sup>13</sup>C 2D COSY NMR spectrum of compound **5a** in DMSO-d<sub>6</sub>.

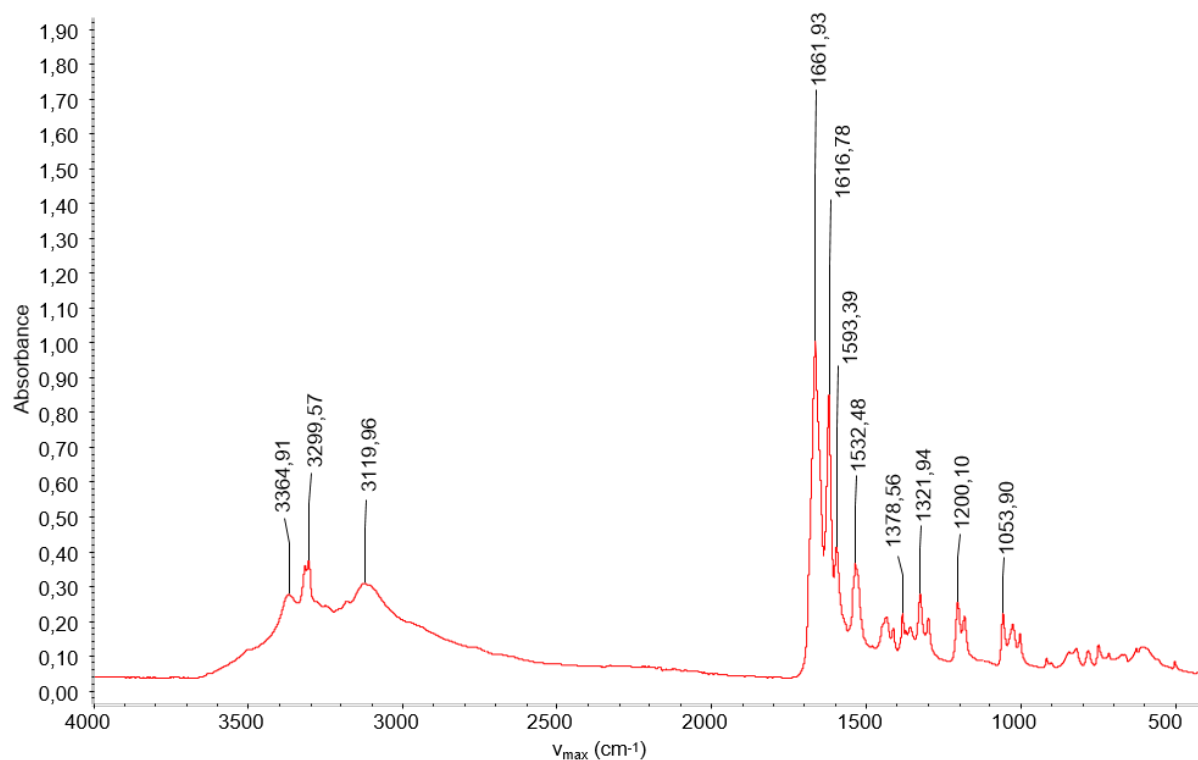

**Figure S34.** ATR-FTIR spectrum of compound **5a**.

### Visualizations of Nuclear magnetic resonance (NMR) and Infrared (IR) spectra of compound **5b**

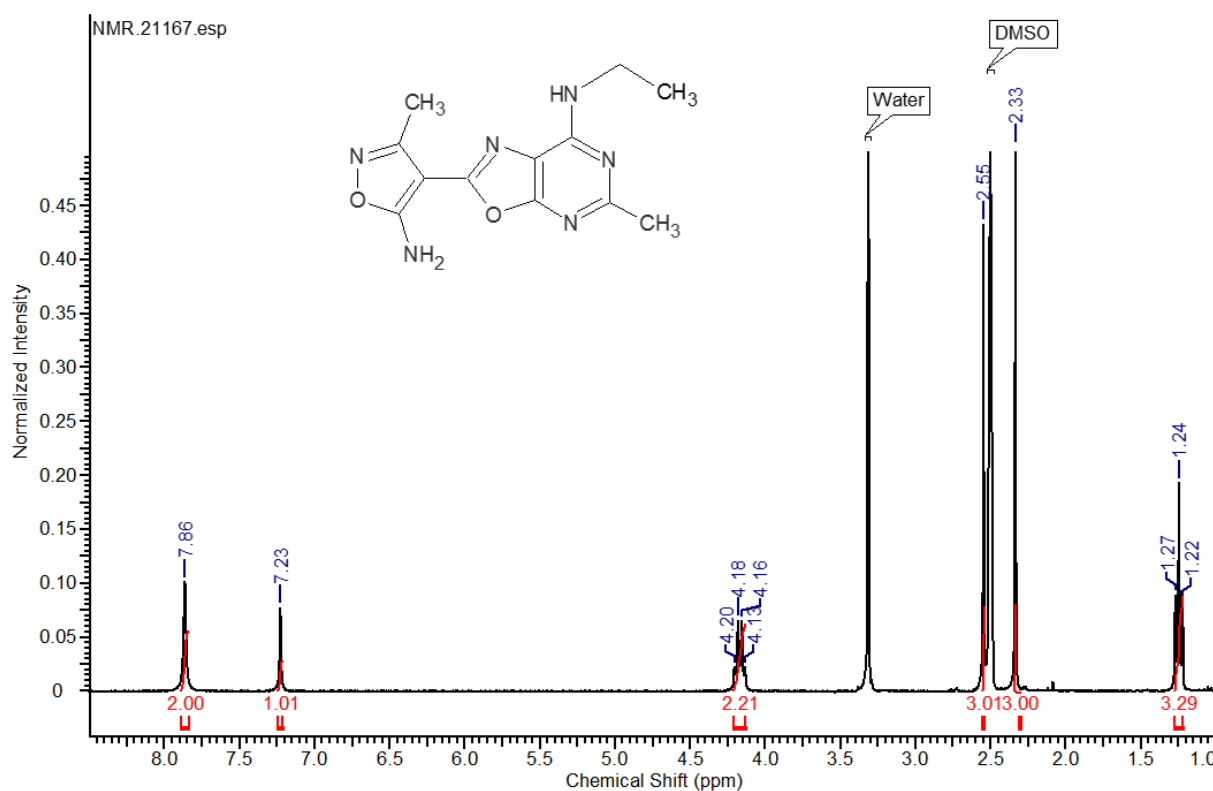

**Figure S35.**  $^1\text{H}$ -NMR spectrum of compound **5b** in  $\text{DMSO-d}_6$ .

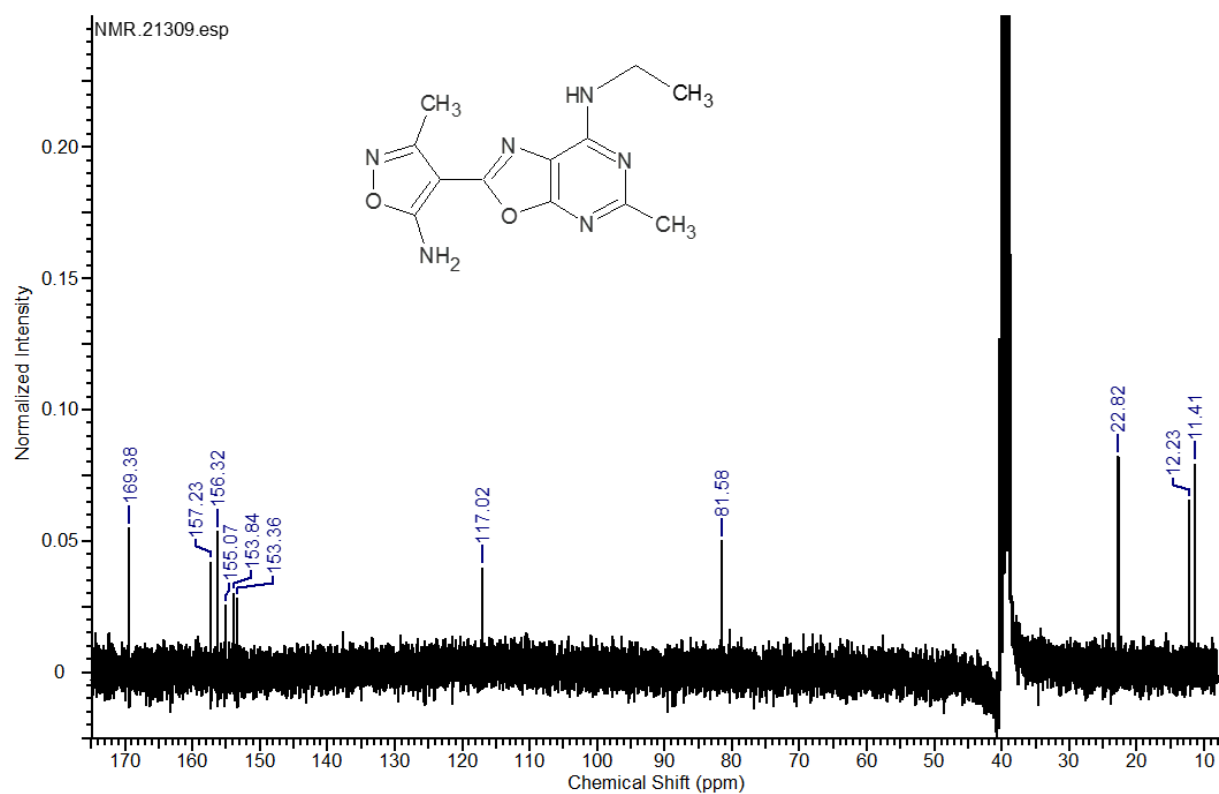

**Figure S36.** <sup>13</sup>C-NMR spectrum of compound **5b** in DMSO-d<sub>6</sub>.



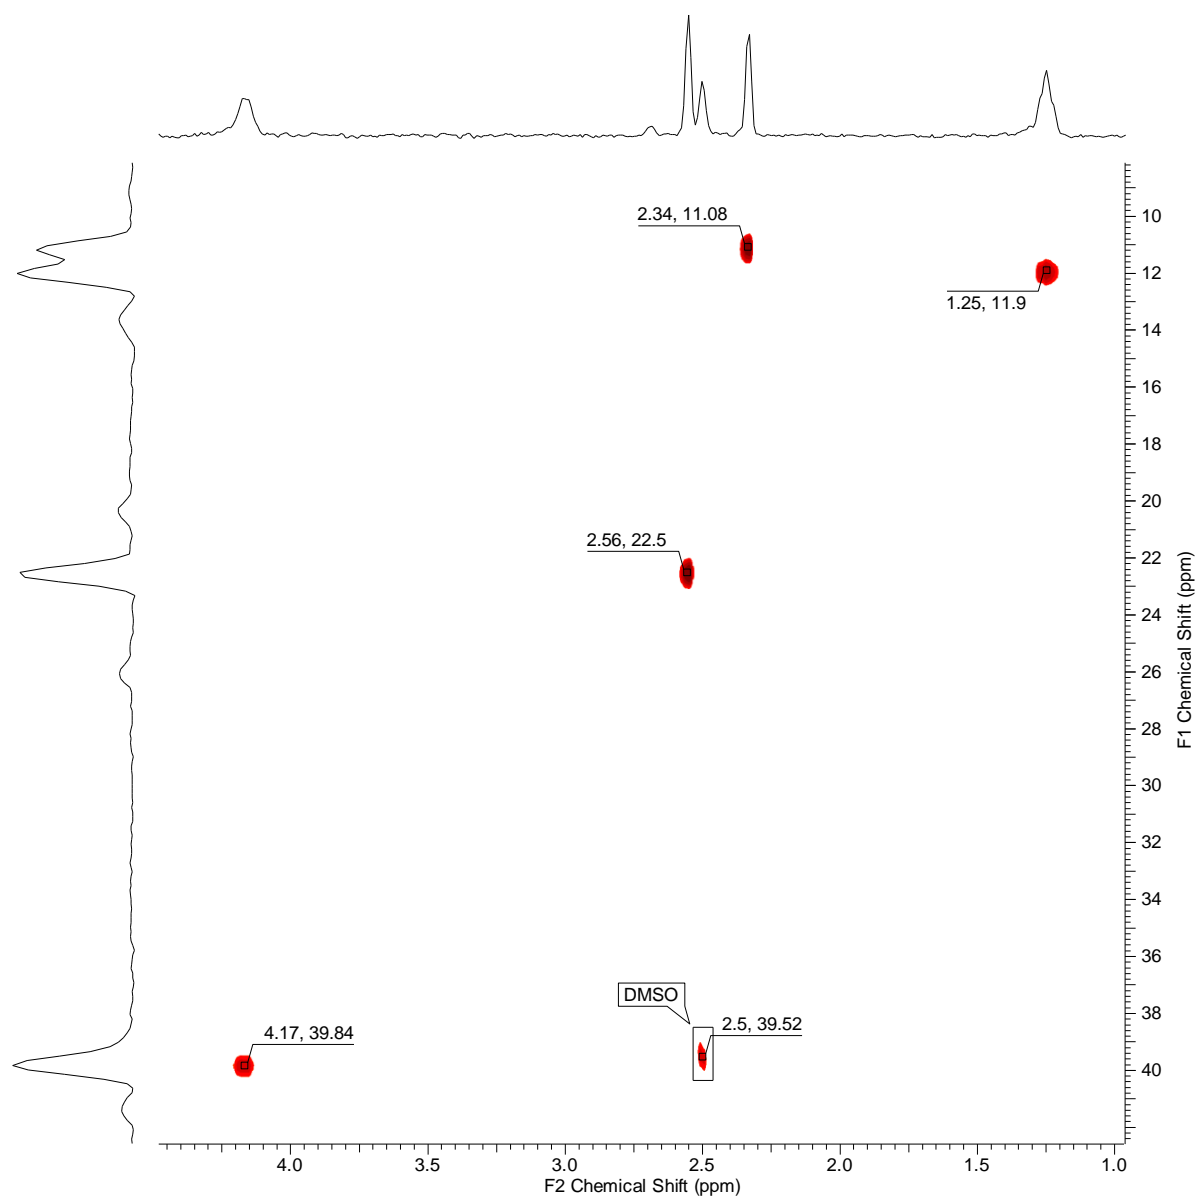

**Figure S37.**  $^1\text{H}$ - $^{13}\text{C}$  2D HSQC (Heteronuclear Single Quantum Coherence=Heteronuclear Single Quantum Correlation) NMR of compound **5b** in DMSO- $d_6$ .

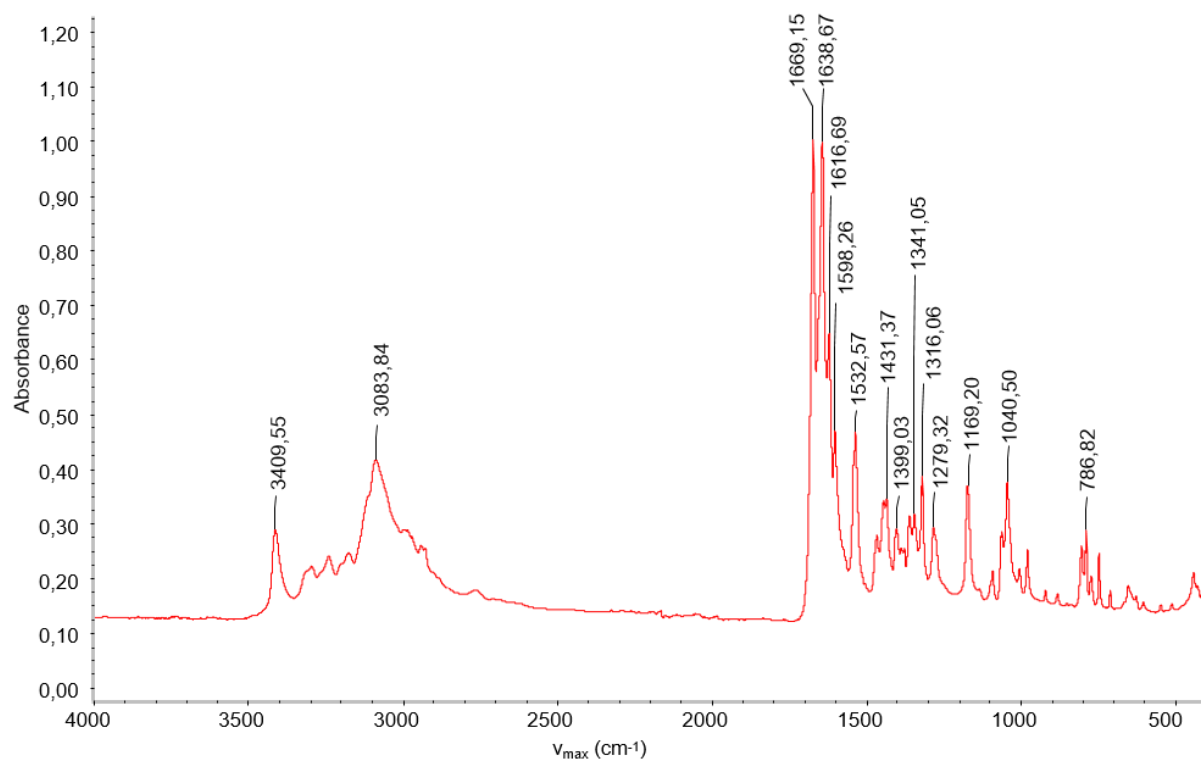

**Figure S38.** ATR-FTIR spectrum of compound **5b**.

### Visualizations of Nuclear magnetic resonance (NMR) and Infrared (IR) spectra of compound **5c**

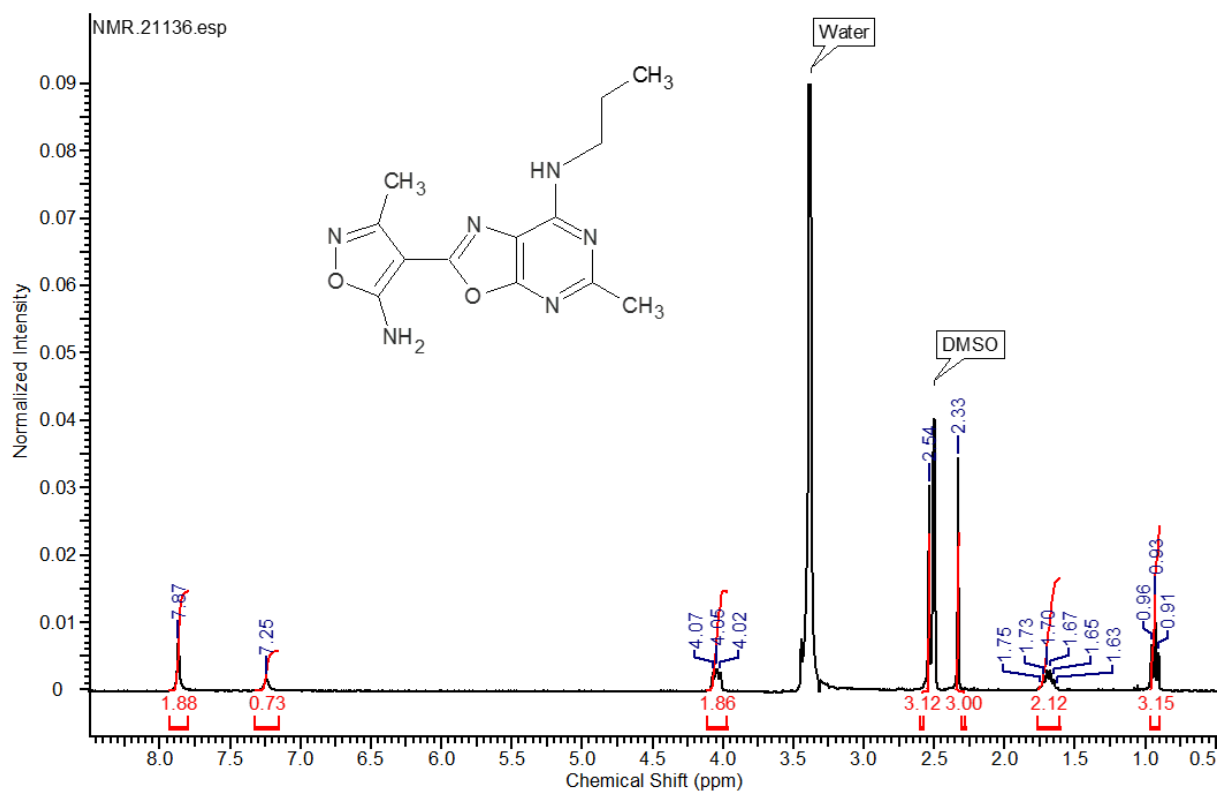

**Figure S39.**  $^1\text{H}$ -NMR spectrum of compound **5c** in DMSO- $d_6$  (method A).

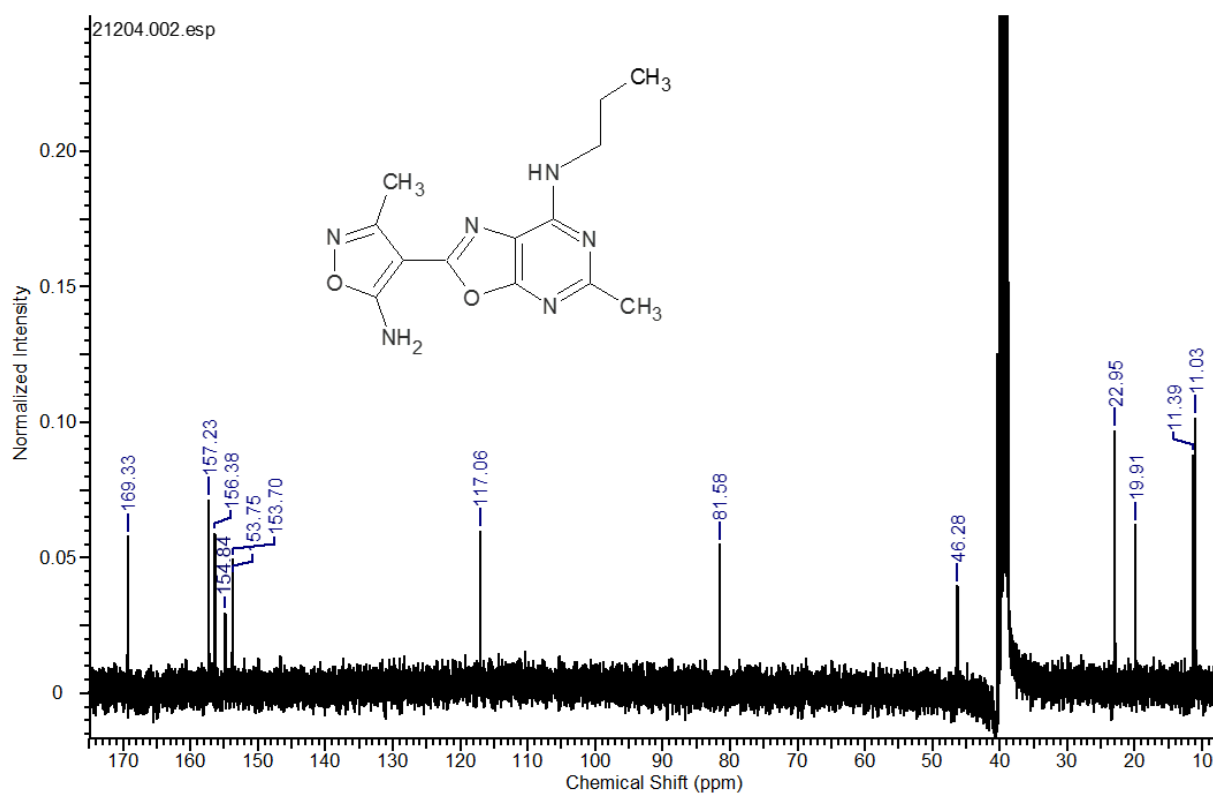

**Figure S40.** <sup>13</sup>C-NMR spectrum of compound **5c** in DMSO-d<sub>6</sub> (method A).

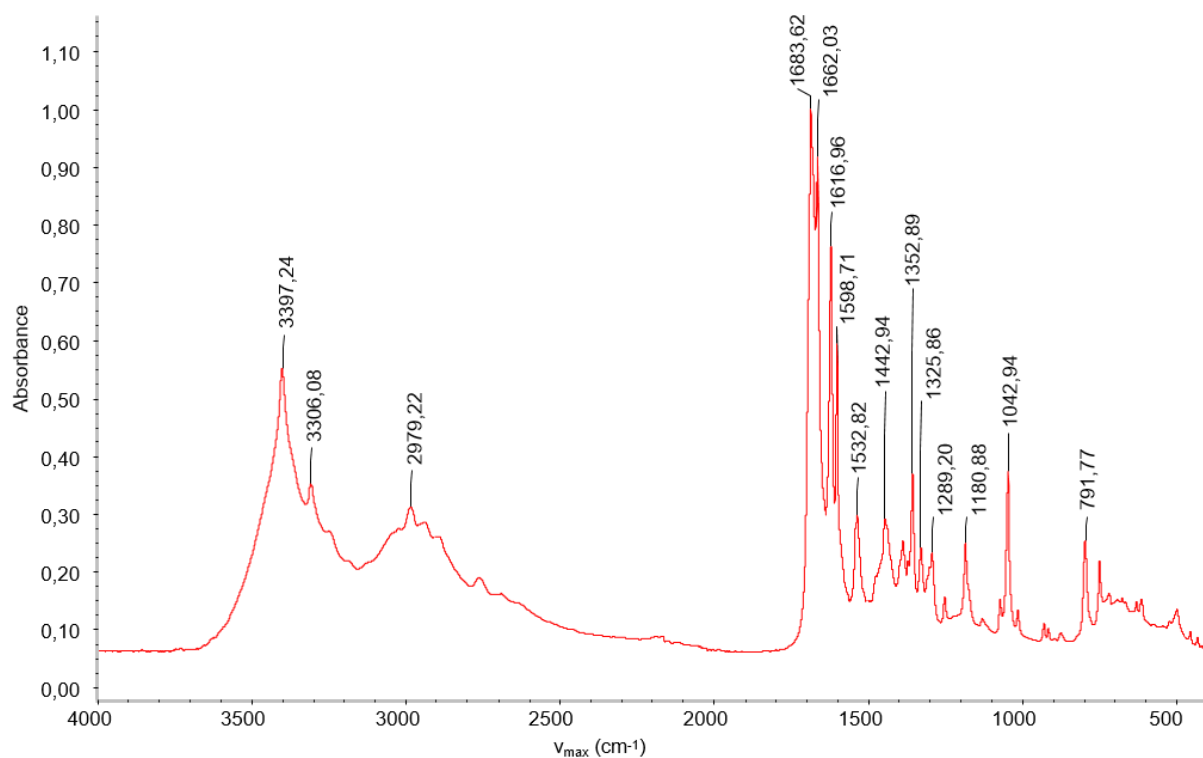

**Figure S41.** ATR-FTIR spectrum of compound **5c** (method A).

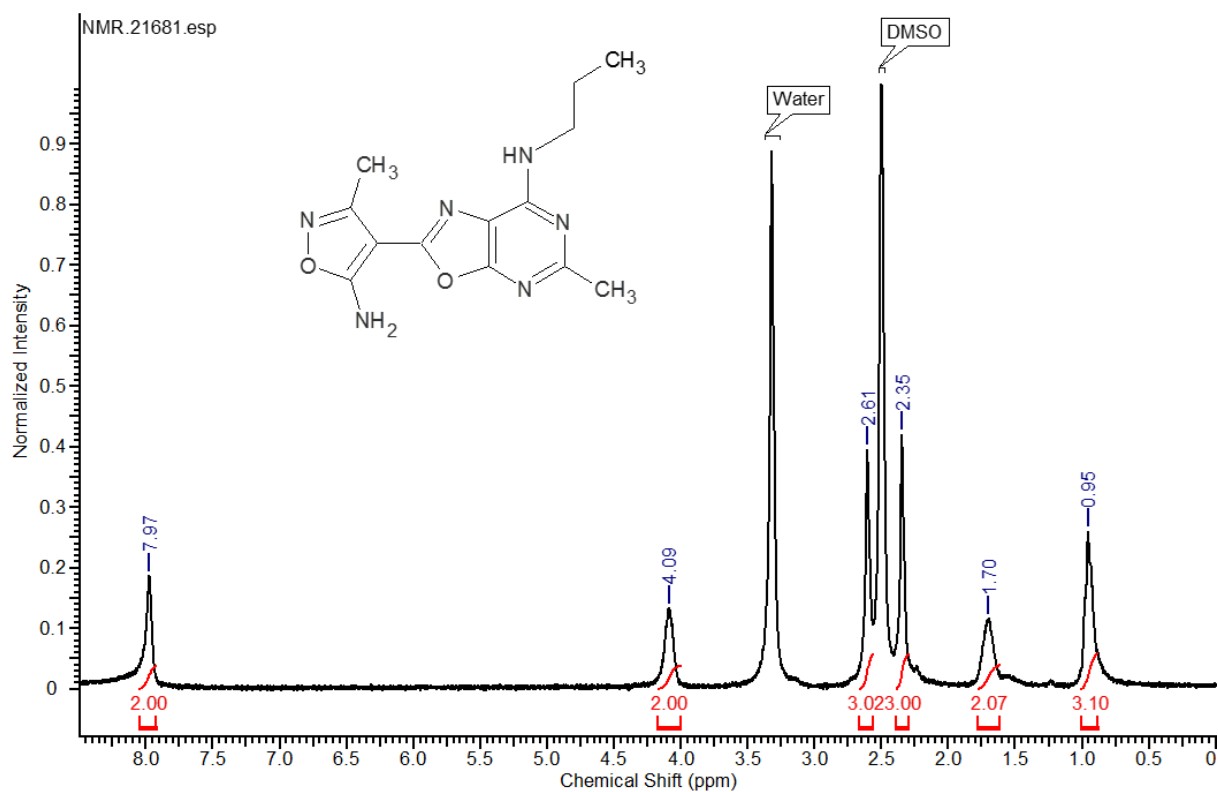

**Figure S42.** <sup>1</sup>H-NMR spectrum of compound **5c** in DMSO-d<sub>6</sub> (method B).

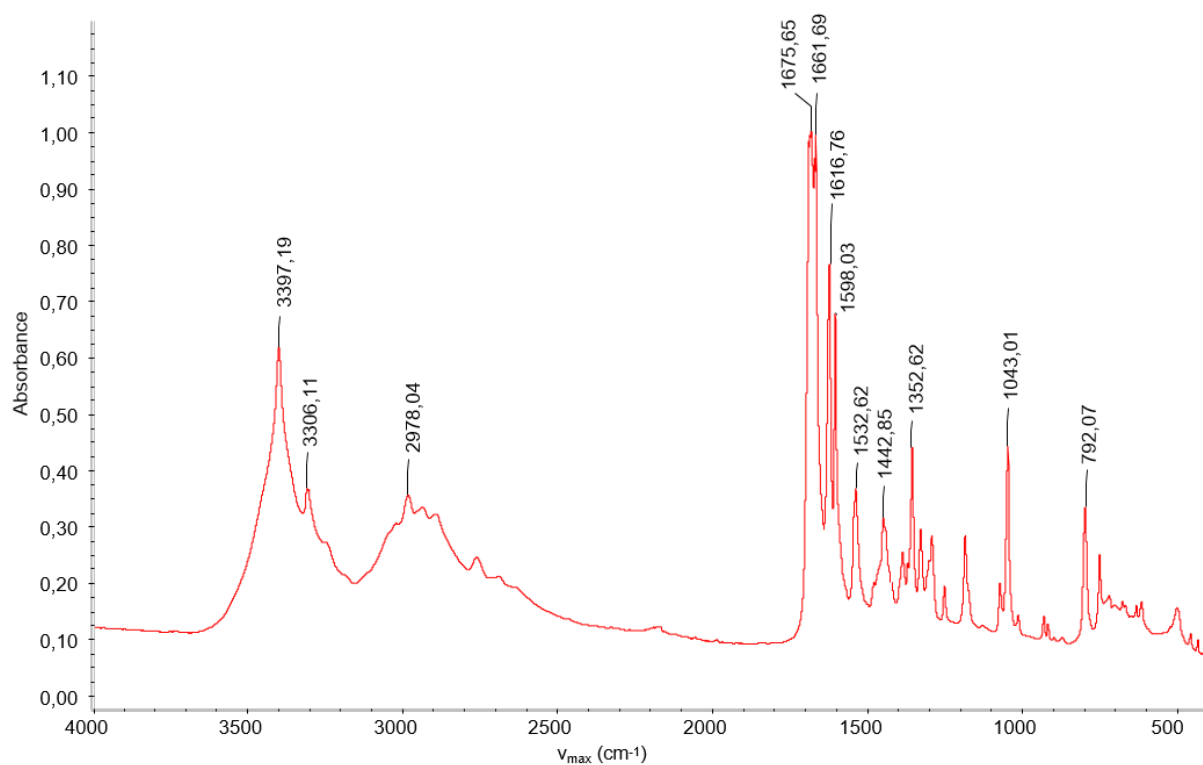

**Figure S43.** ATR-FTIR spectrum of compound **5c** (method B).

## Visualizations of Nuclear magnetic resonance (NMR) and Infrared (IR) spectra of compound 5d

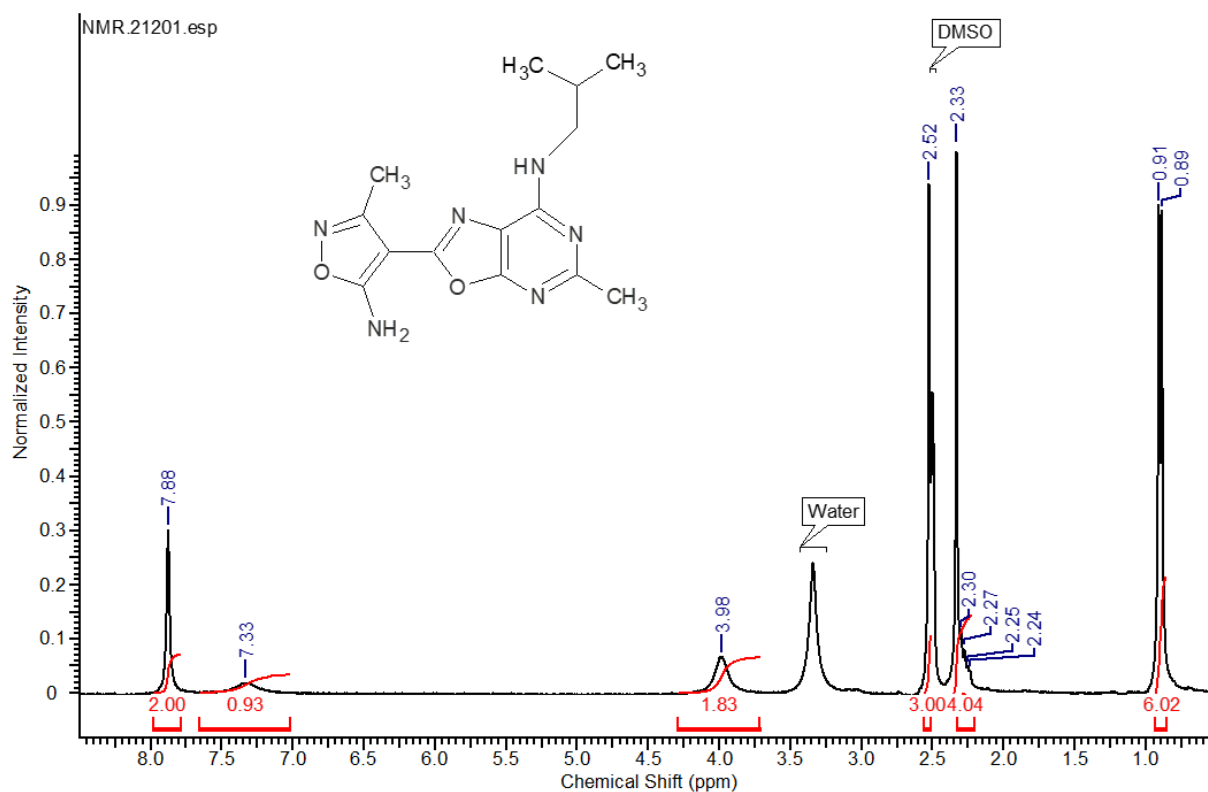

**Figure S44.**  $^1\text{H}$ -NMR spectrum of compound 5d in DMSO- $d_6$ .

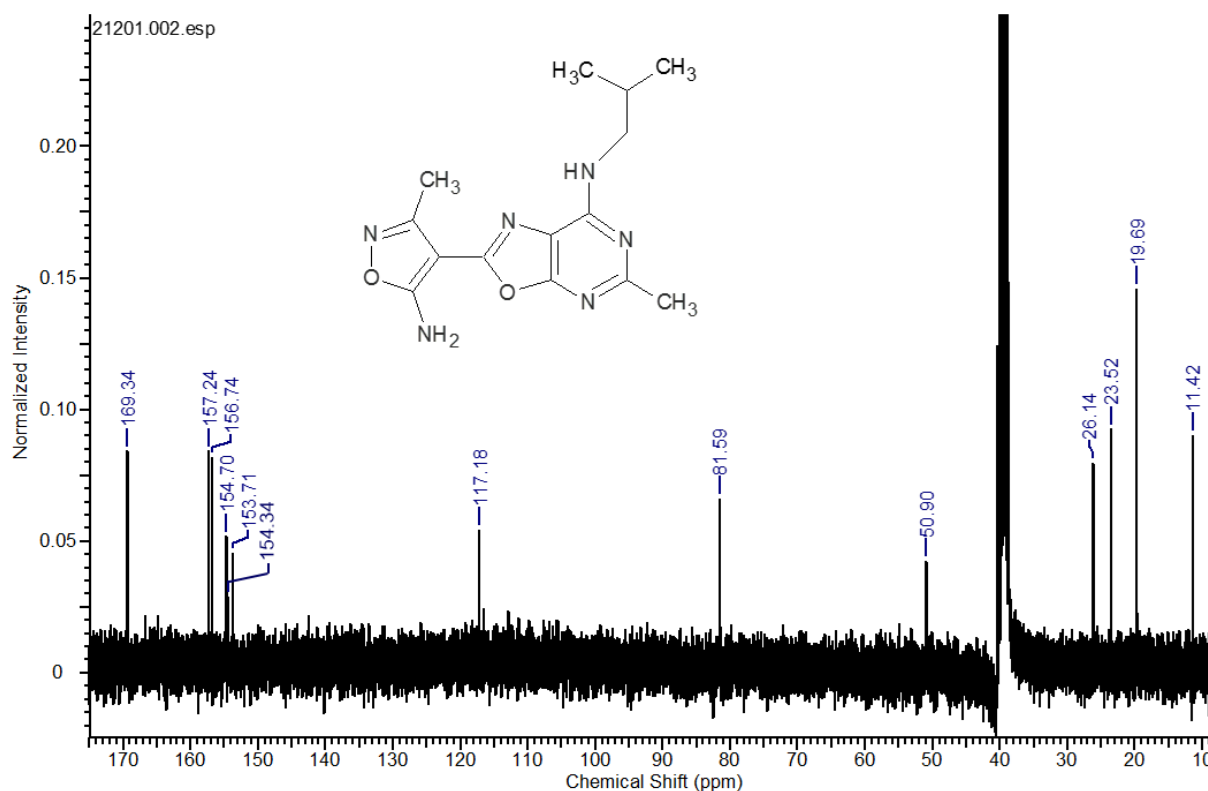

**Figure S45.**  $^{13}\text{C}$ -NMR spectrum of compound 5d.

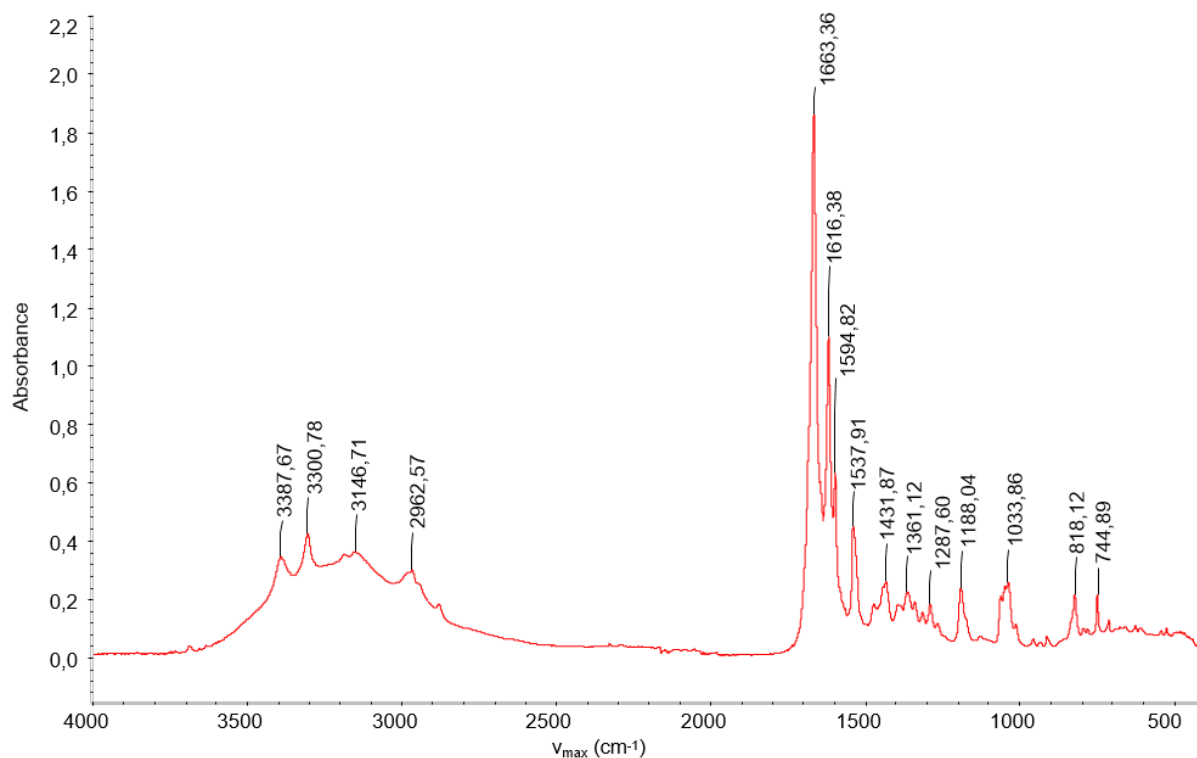

**Figure S46.** ATR-FTIR spectrum of compound **5d**.

### Visualizations of Nuclear magnetic resonance (NMR) and Infrared (IR) spectra of compound **5e**

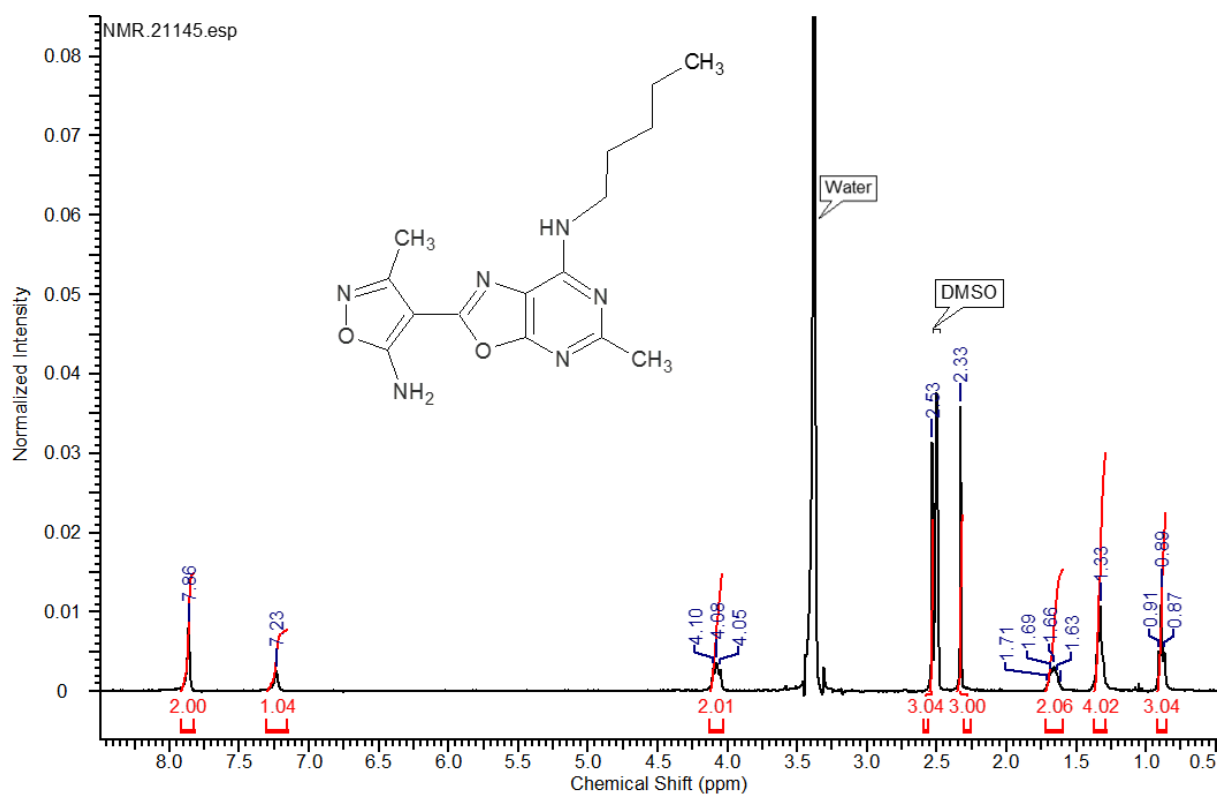

**Figure S47.**  $^1\text{H}$ -NMR spectrum of compound **5e** in DMSO- $d_6$ .

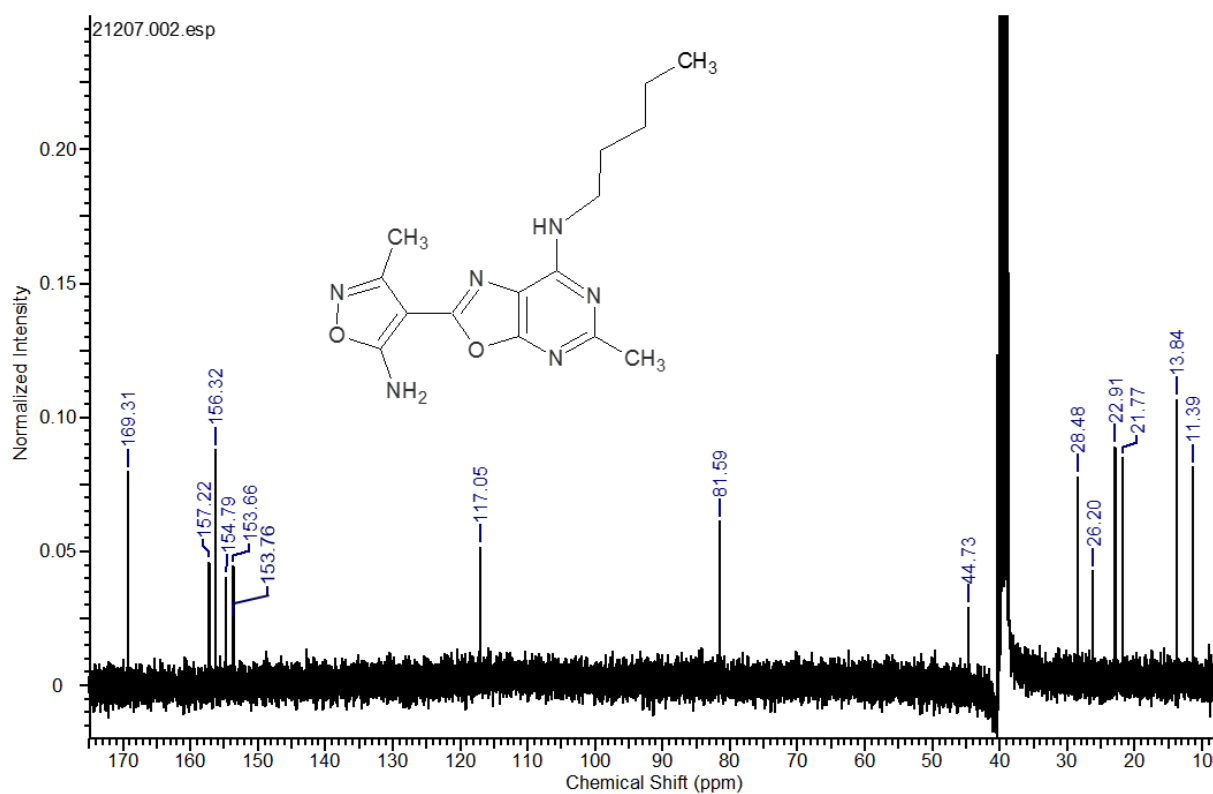

**Figure S48.** <sup>13</sup>C-NMR spectrum of compound 5e in DMSO-d<sub>6</sub>.

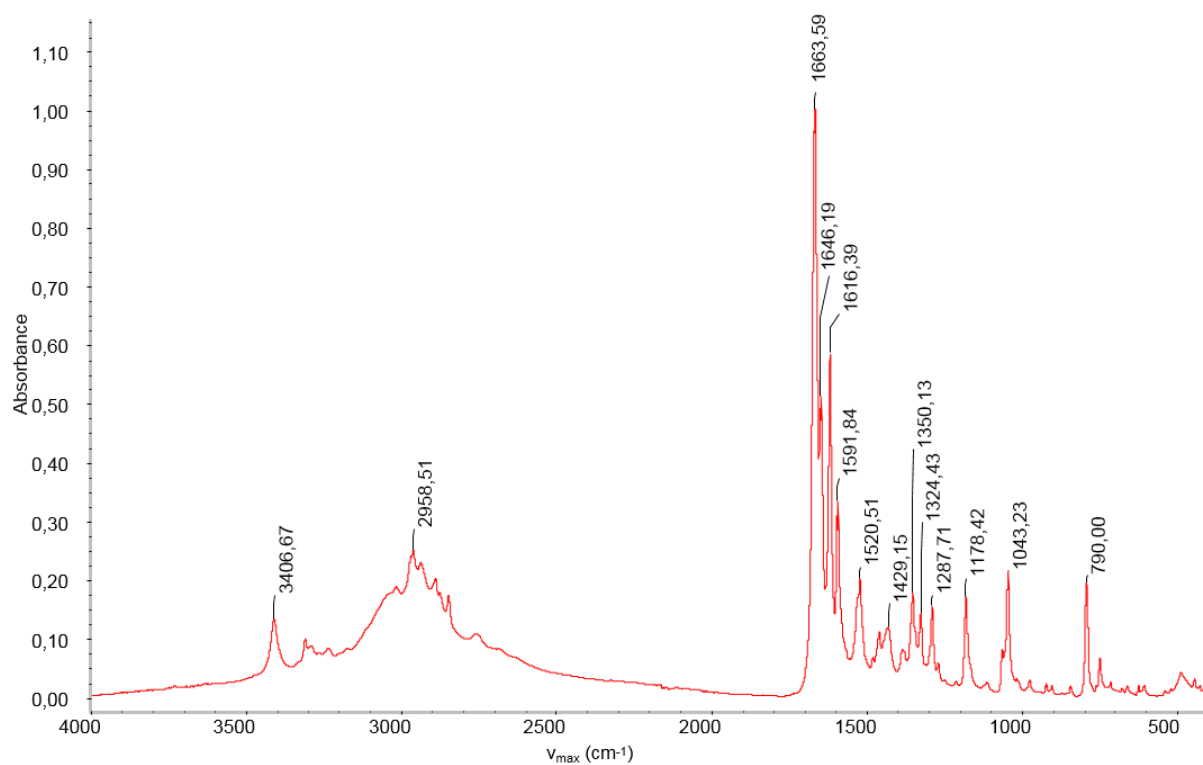

**Figure S49.** ATR-FTIR spectrum of compound 5e.

## Visualizations of Nuclear magnetic resonance (NMR) and Infrared (IR) spectra of compound 5f

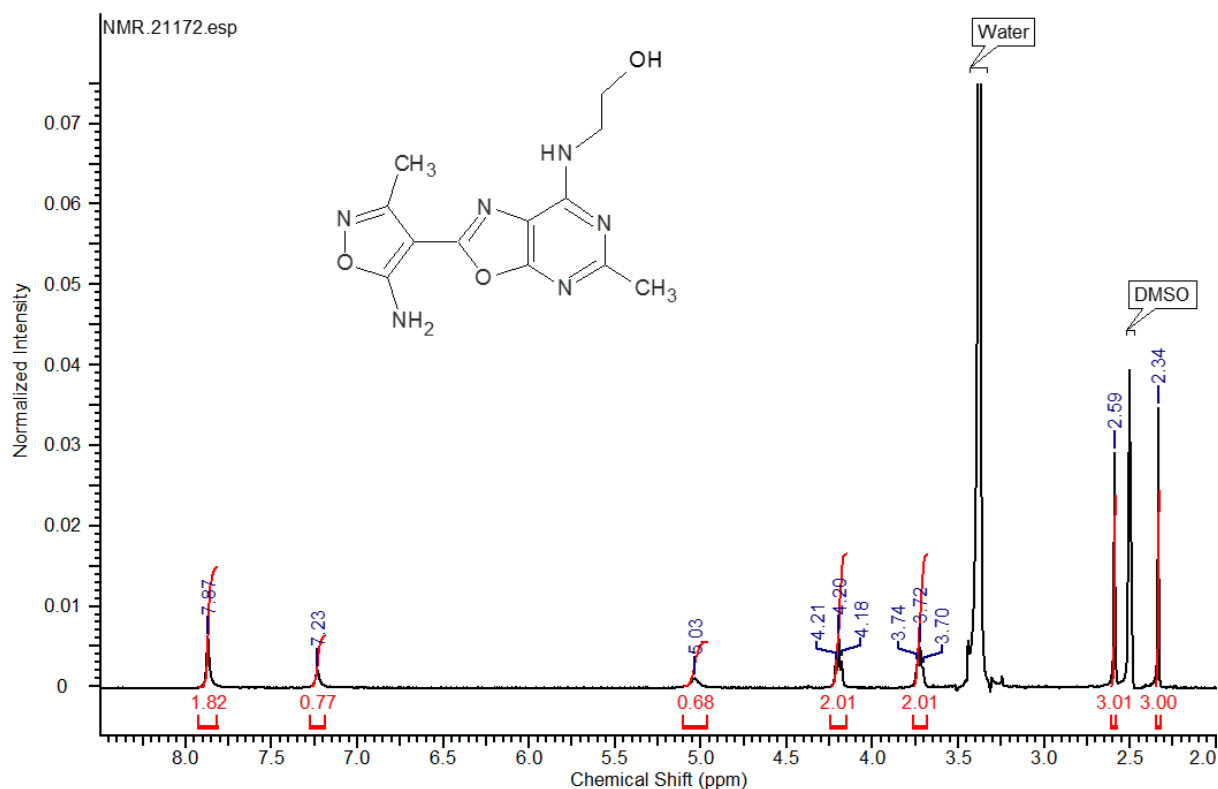

**Figure S50.**  $^1\text{H}$ -NMR spectrum of compound 5f in DMSO-d<sub>6</sub>.

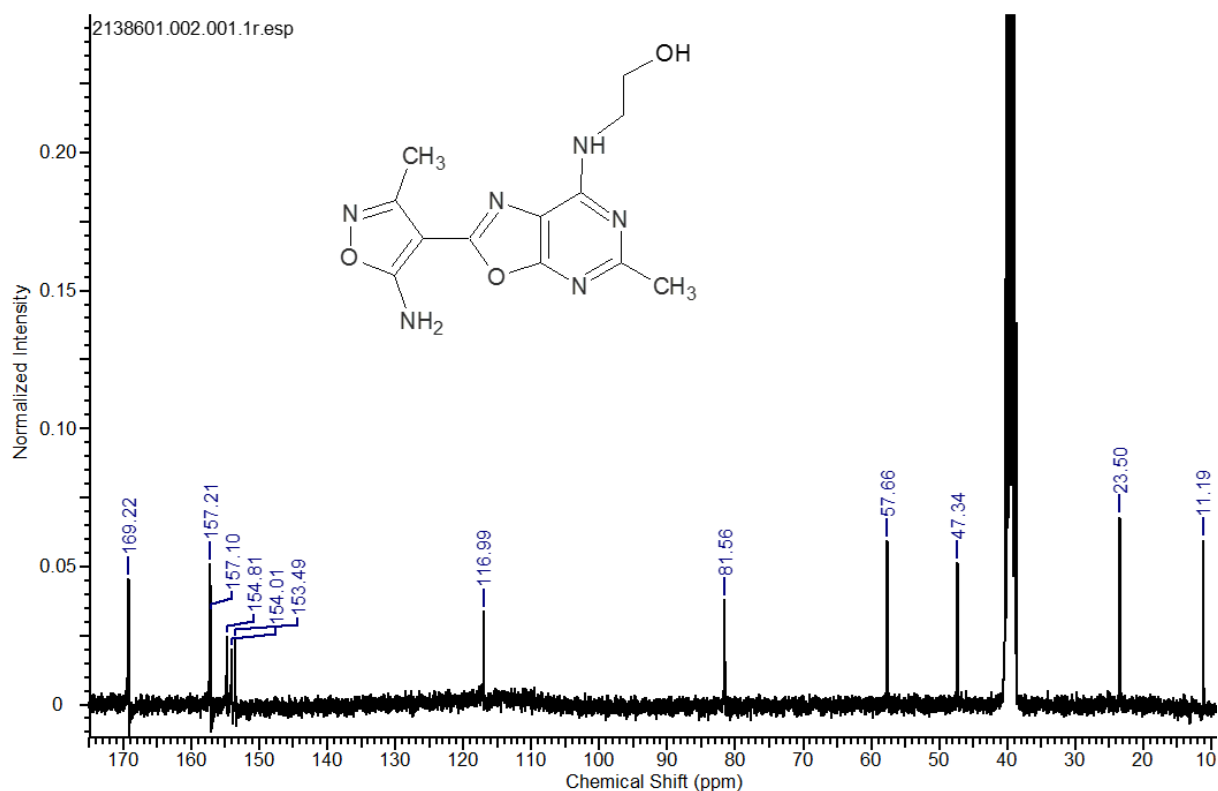

**Figure S51.**  $^{13}\text{C}$ -NMR spectrum of compound 5f in DMSO-d<sub>6</sub>.



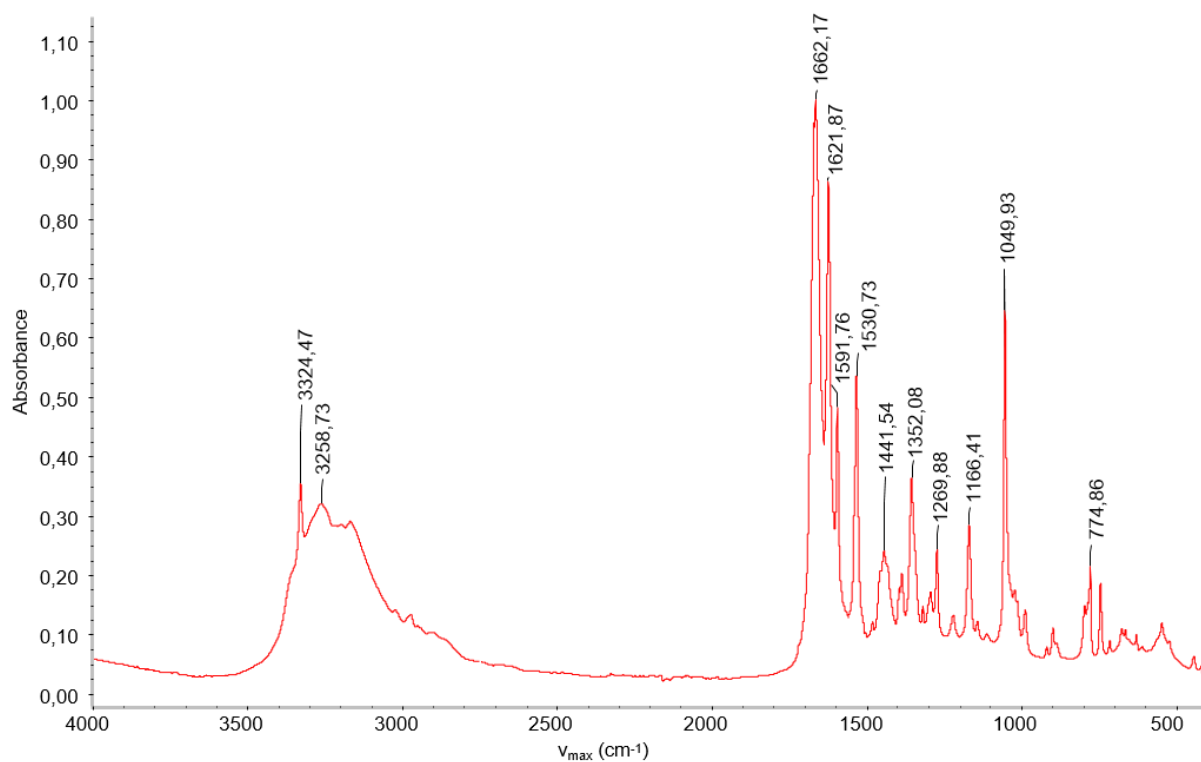

**Figure S52.** ATR-FTIR spectrum of compound **5f**.

### Visualizations of Nuclear magnetic resonance (NMR) and Infrared (IR) spectra of compound **5g**

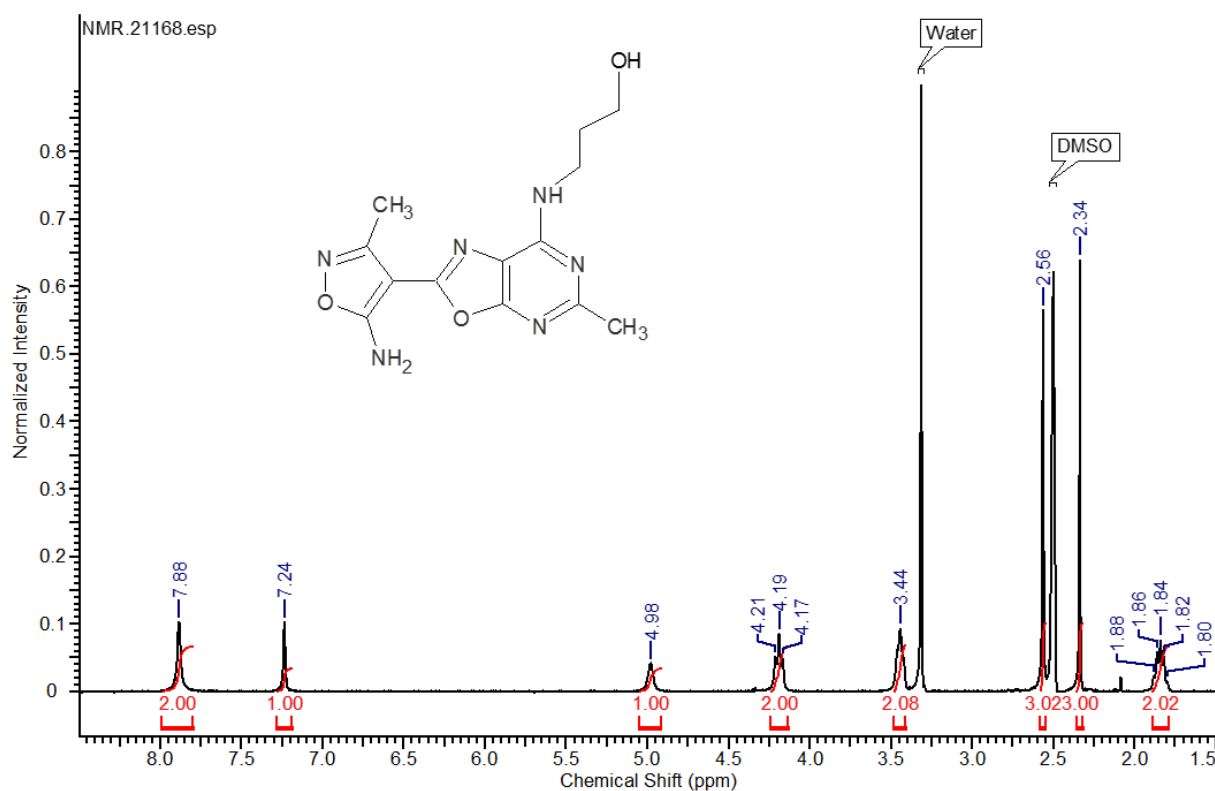

**Figure S53.** <sup>1</sup>H-NMR spectrum of compound **5g** in DMSO-d<sub>6</sub>.

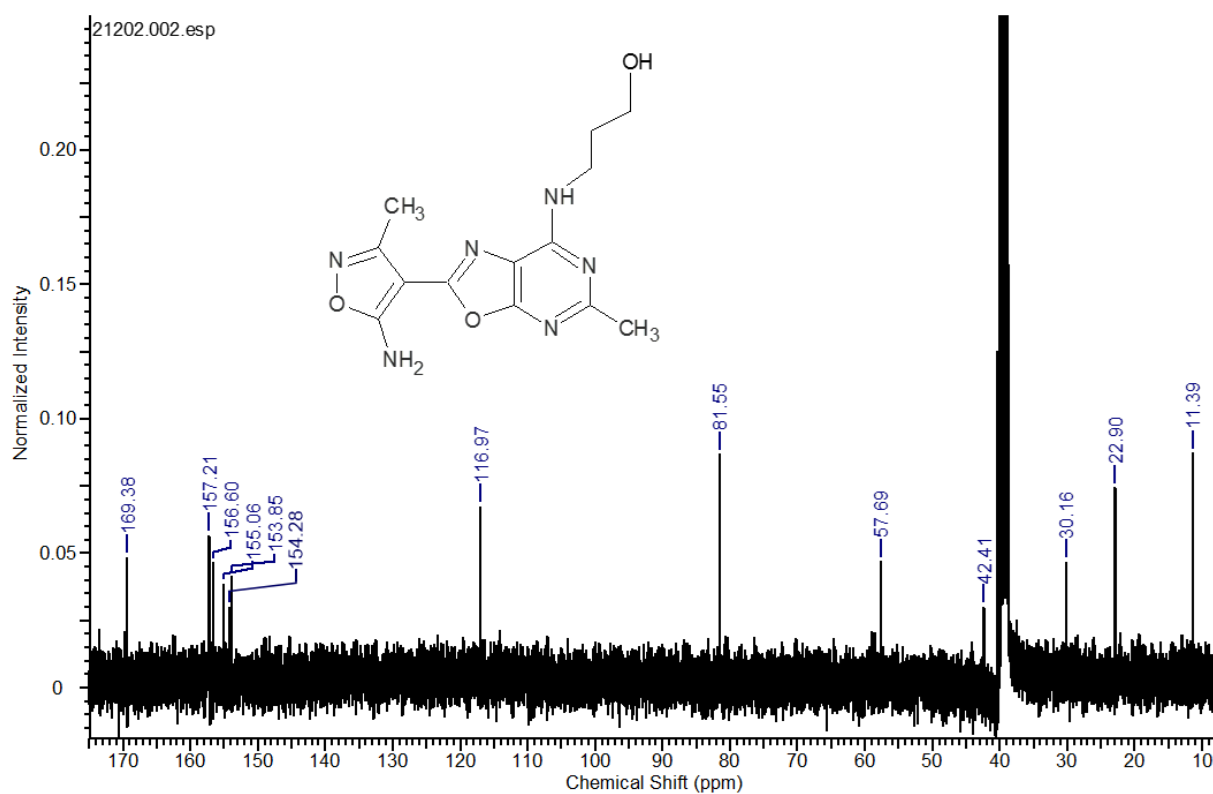

**Figure S54.**  $^{13}\text{C}$ -NMR spectrum of compound **5g** in DMSO- $d_6$ .

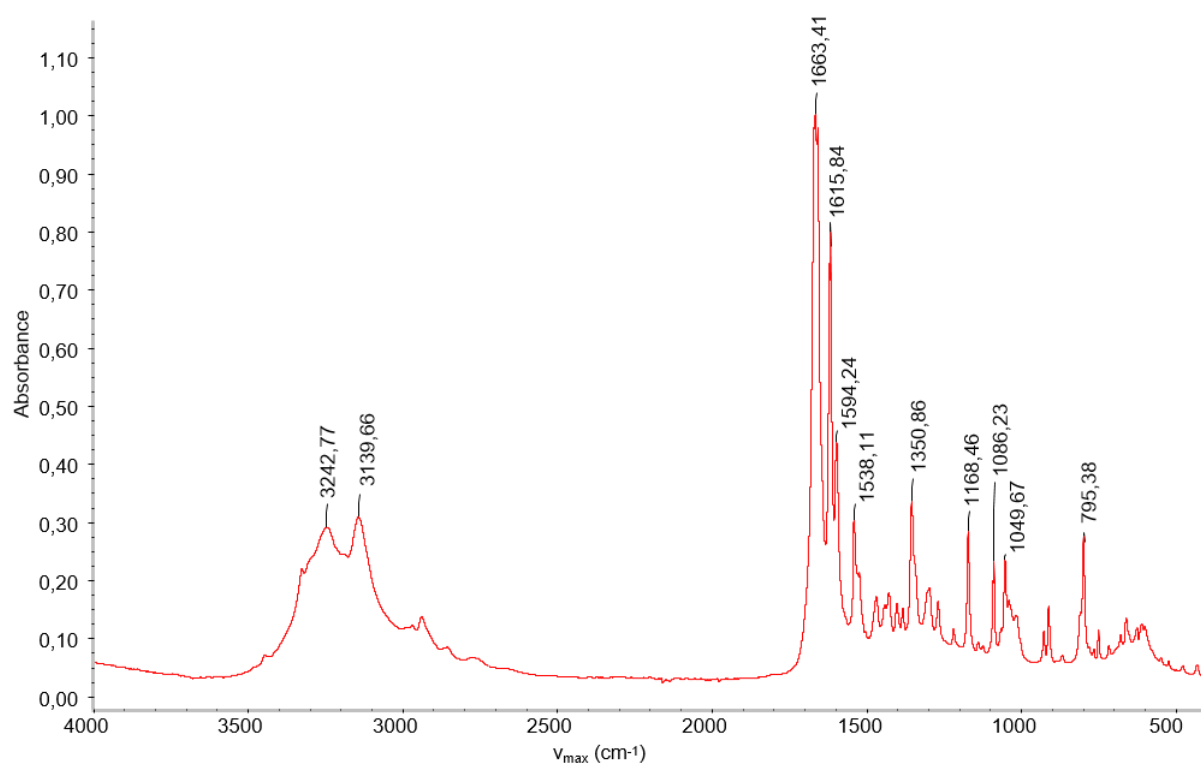

**Figure S55.** ATR-FTIR spectrum of compound **5g**.

## Visualizations of Nuclear magnetic resonance (NMR) and Infrared (IR) spectra of compound 5h

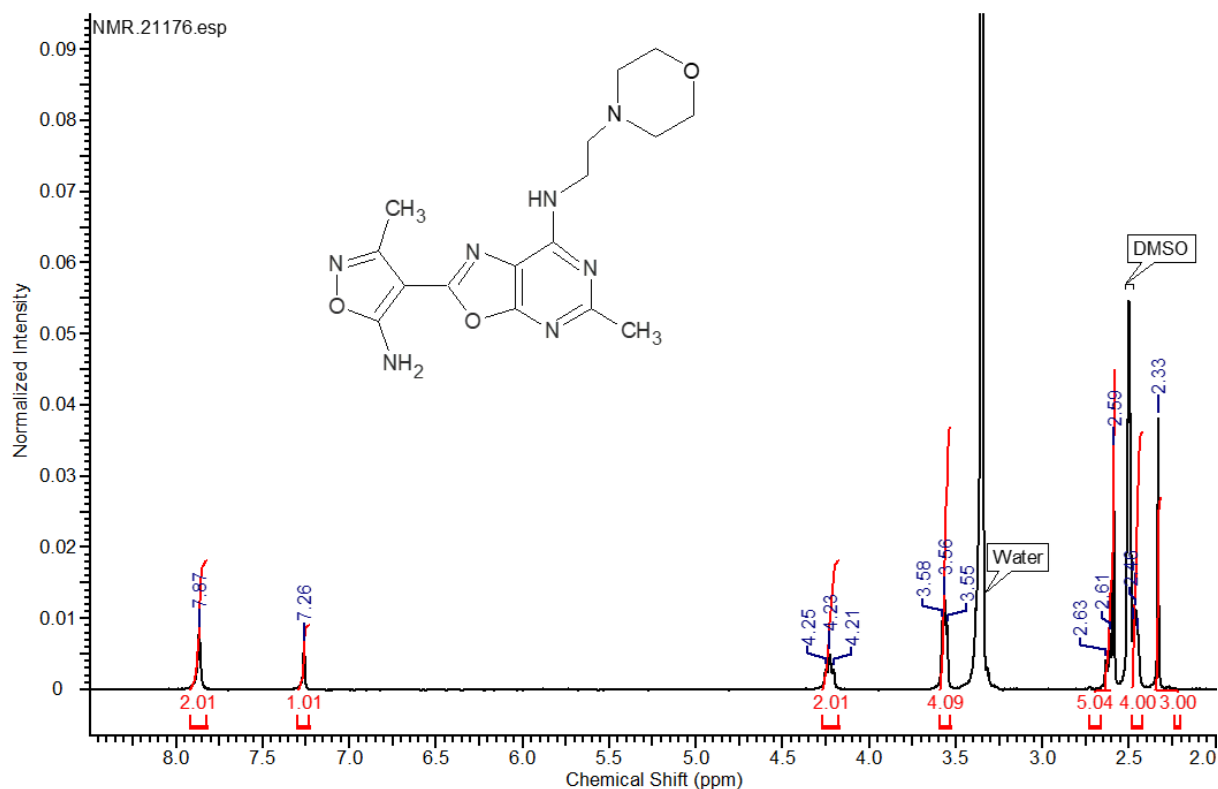

**Figure S56.**  $^1\text{H}$ -NMR spectrum of compound **5h** in DMSO- $d_6$ .

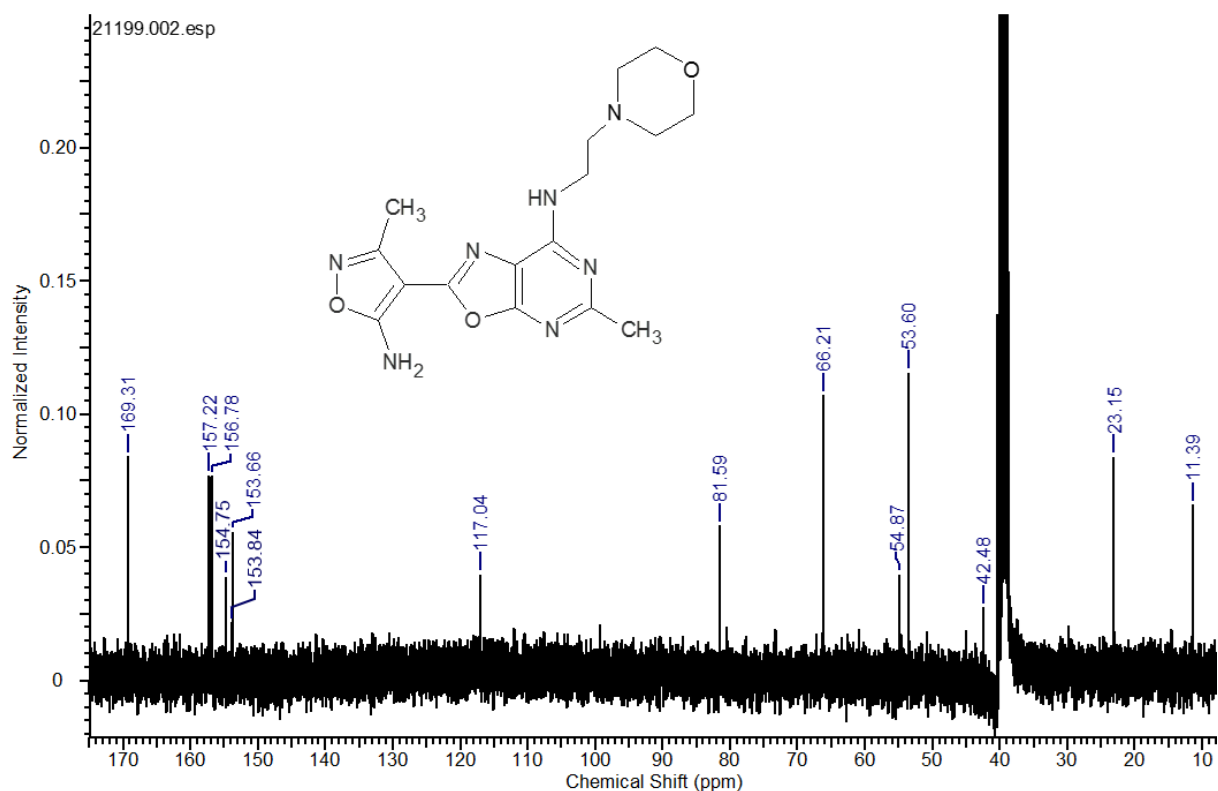

**Figure S57.**  $^{13}\text{C}$ -NMR spectrum of compound **5h** in DMSO- $d_6$ .

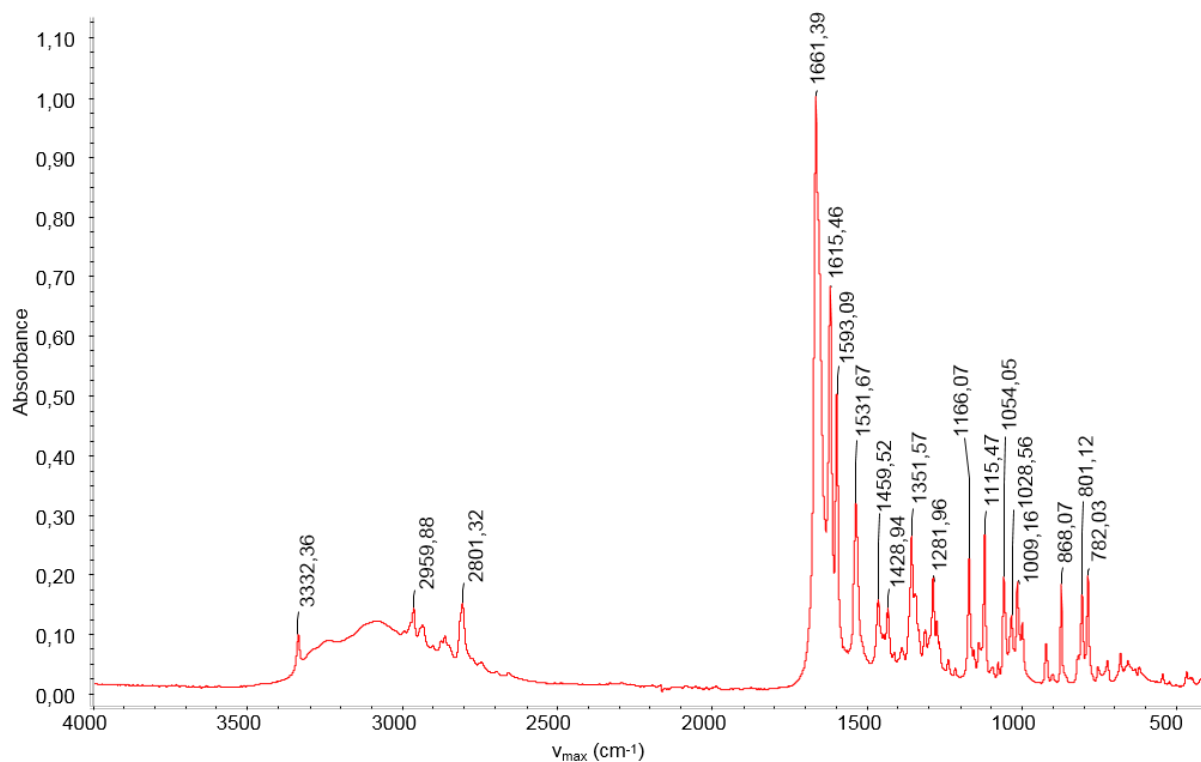

**Figure S58.** ATR-FTIR spectrum of compound **5h**.

### Visualizations of Nuclear magnetic resonance (NMR) and Infrared (IR) spectra of compound **5i**

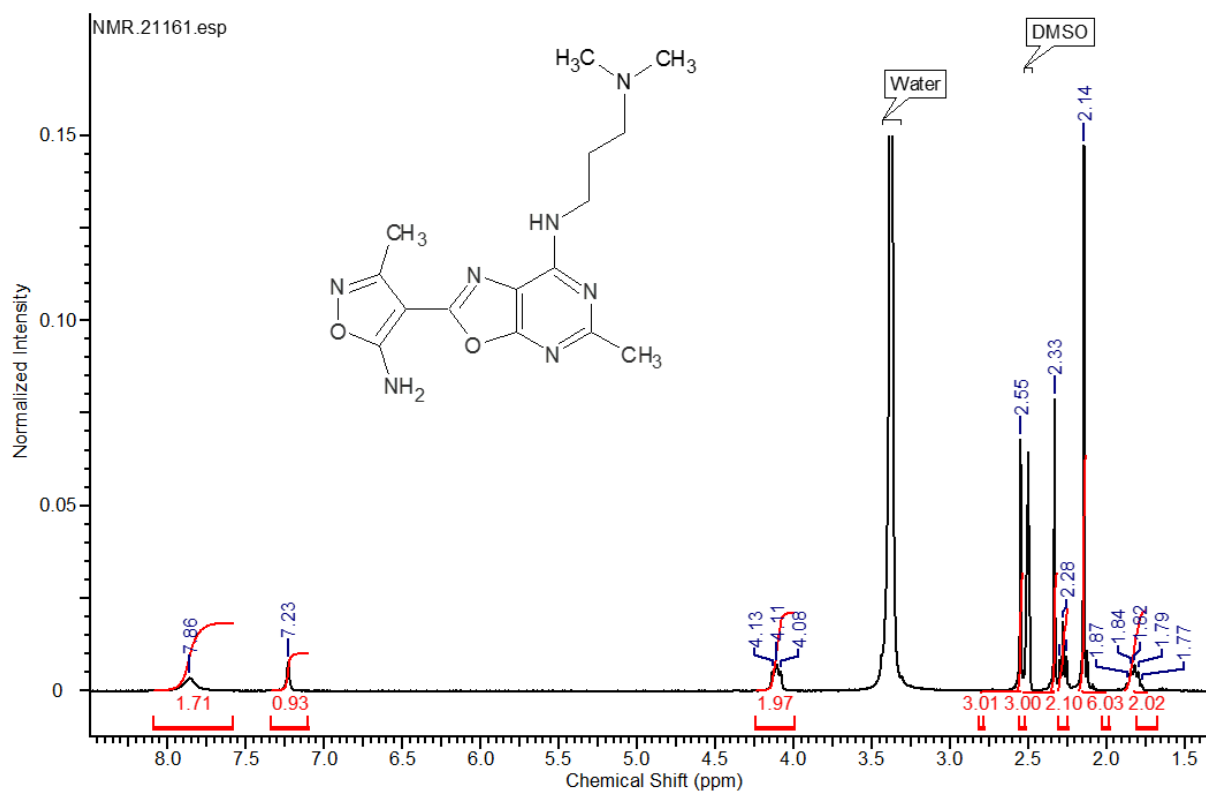

**Figure S59.**  $^1\text{H}$ -NMR spectrum of compound **5i** in DMSO- $d_6$  (method A).

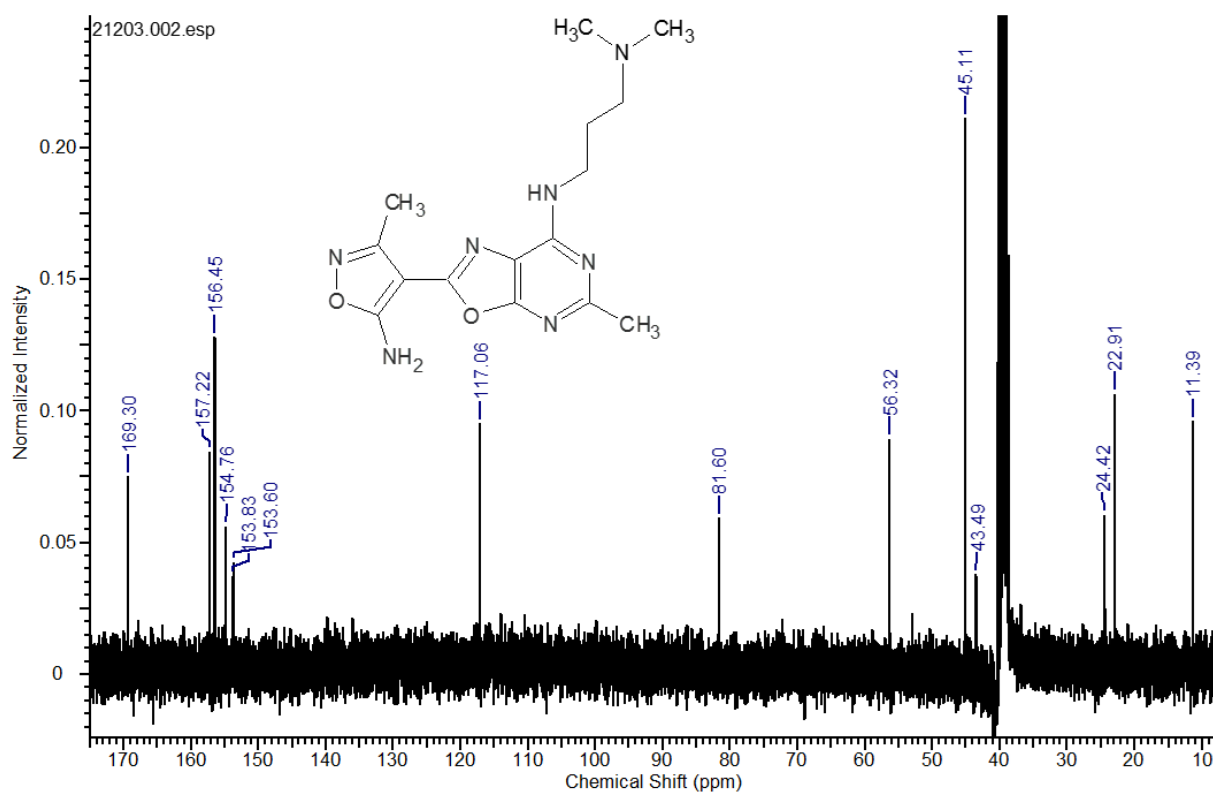

**Figure S60.** <sup>13</sup>C-NMR spectrum of compound **5i** in DMSO-d<sub>6</sub> (method A).

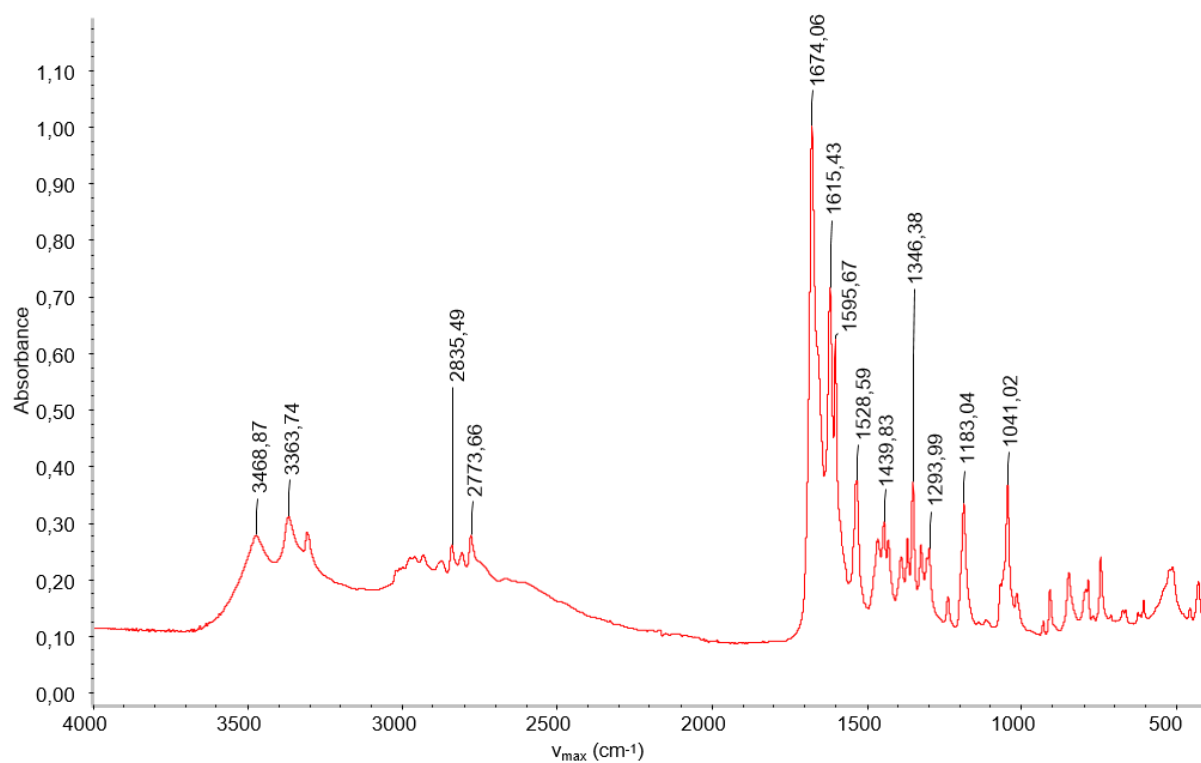

**Figure S61.** ATR-FTIR spectrum of compound **5i** (method A).

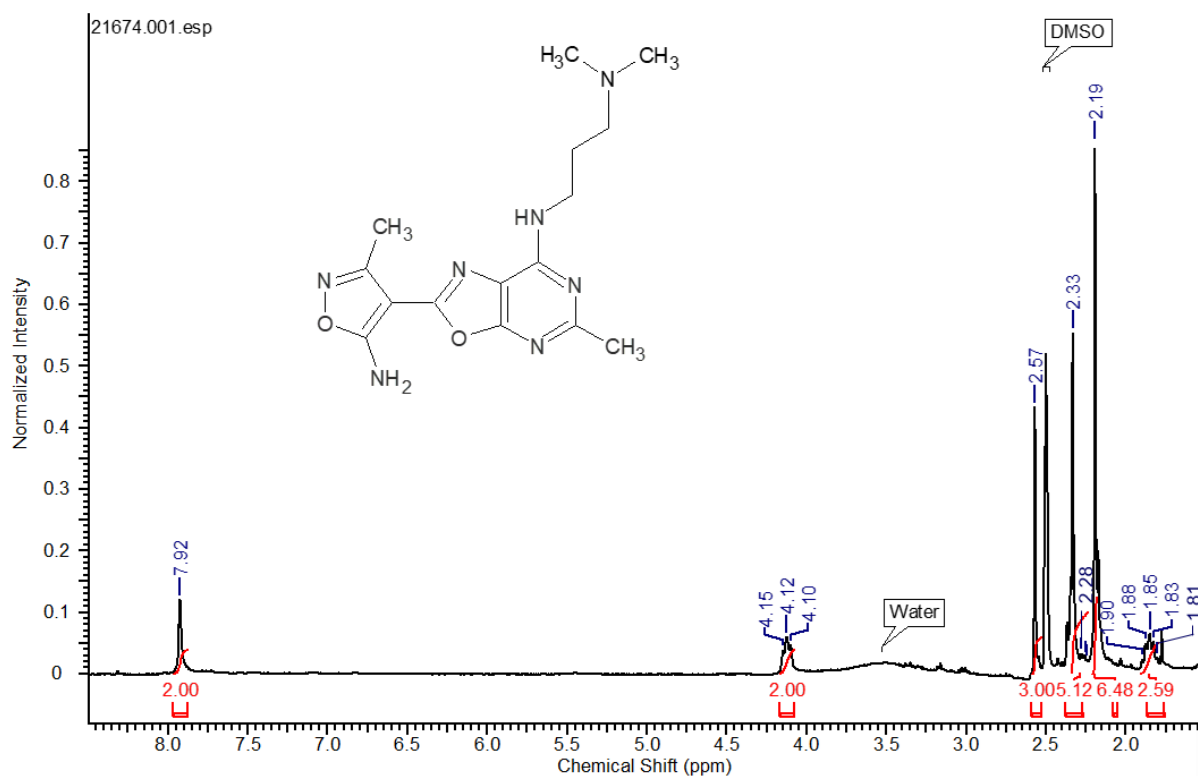

**Figure S62.** <sup>1</sup>H-NMR spectrum of compound **5i** in DMSO-d<sub>6</sub> (method B).

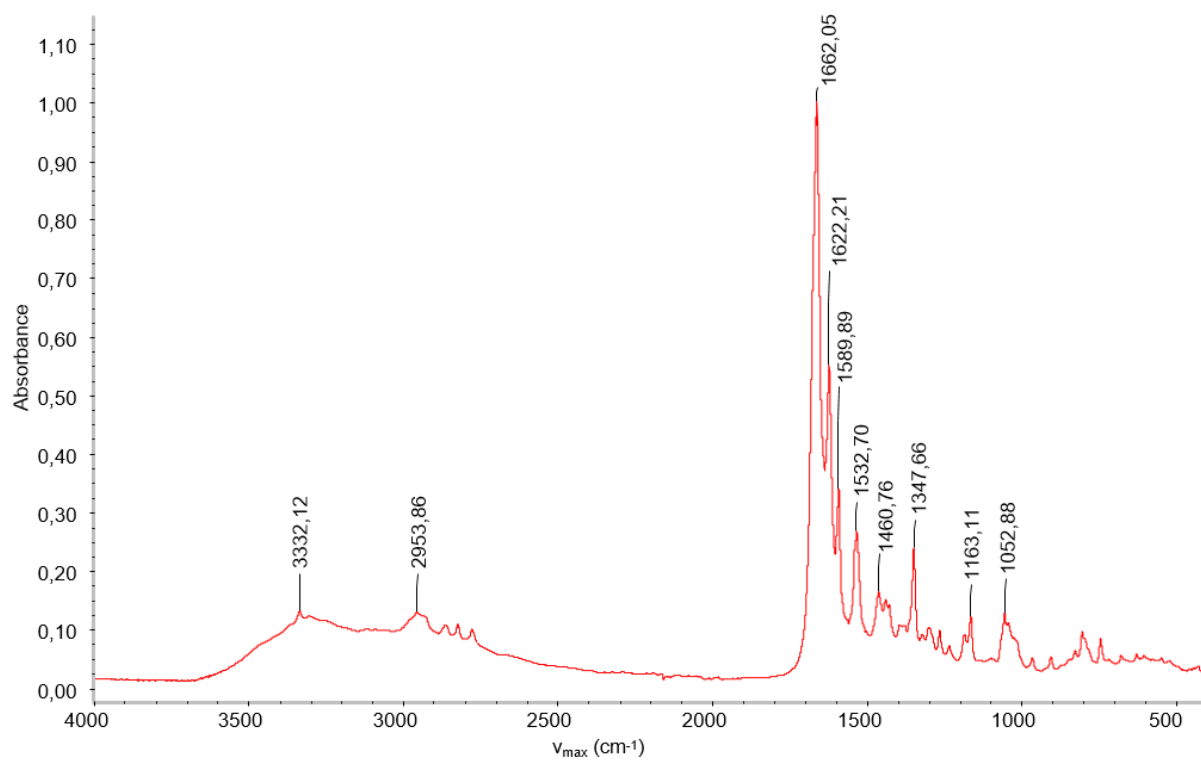

**Figure S63.** ATR-FTIR spectrum of compound **5i** (method B).

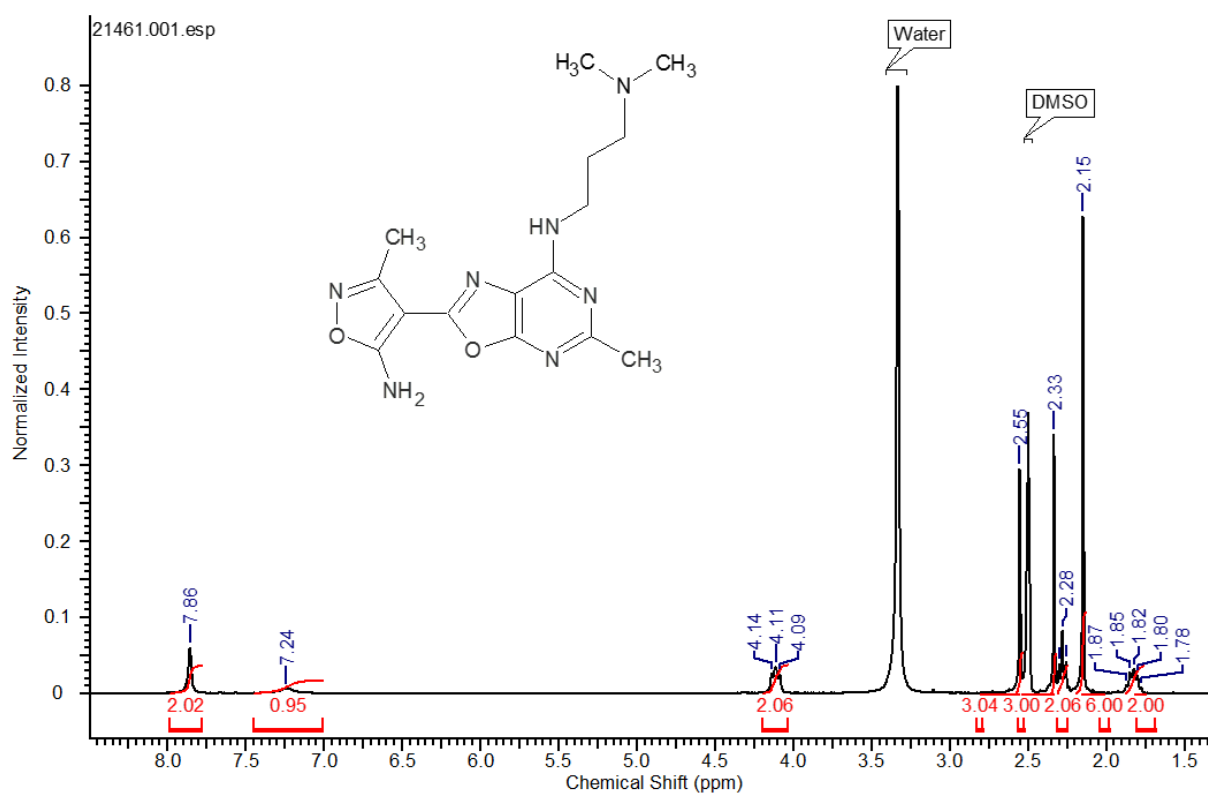

**Figure S64.** <sup>1</sup>H-NMR spectrum of compound **5i** in DMSO-d<sub>6</sub> (method C).

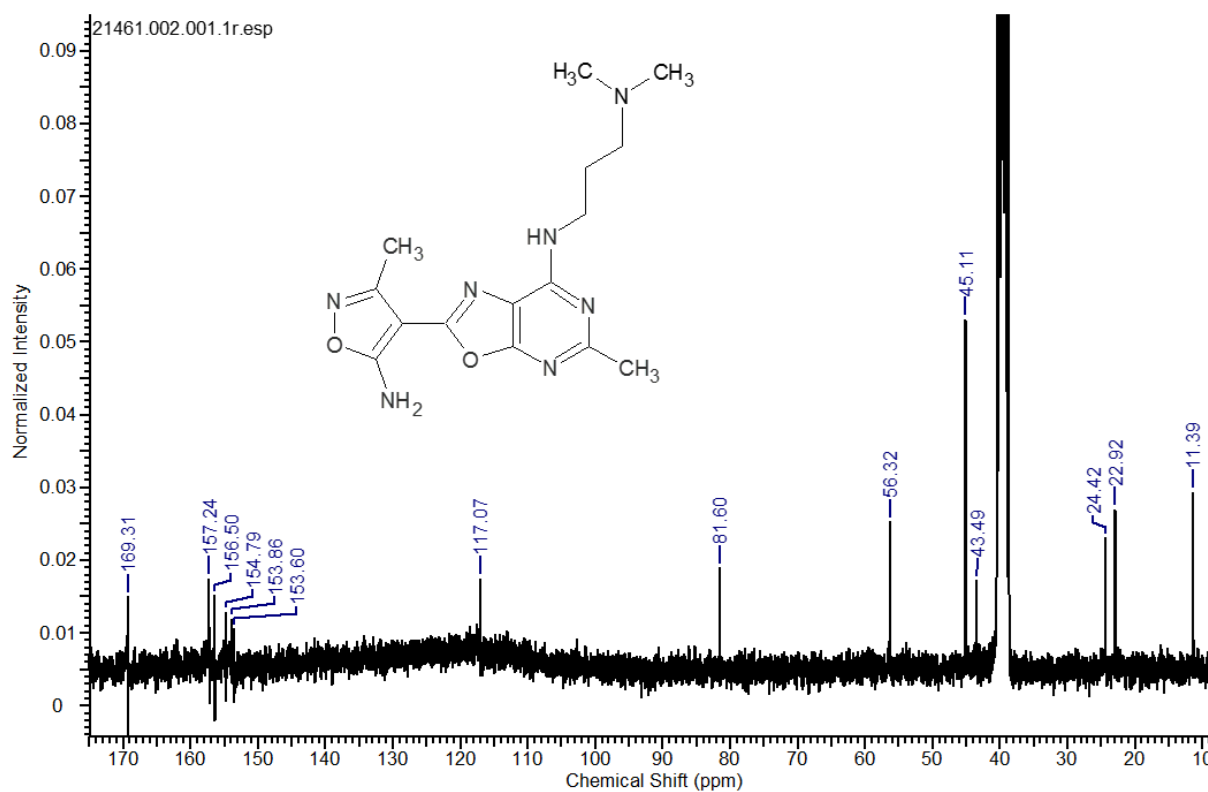

**Figure S65.** <sup>13</sup>C-NMR spectrum of compound **5i** in DMSO-d<sub>6</sub> (method C).

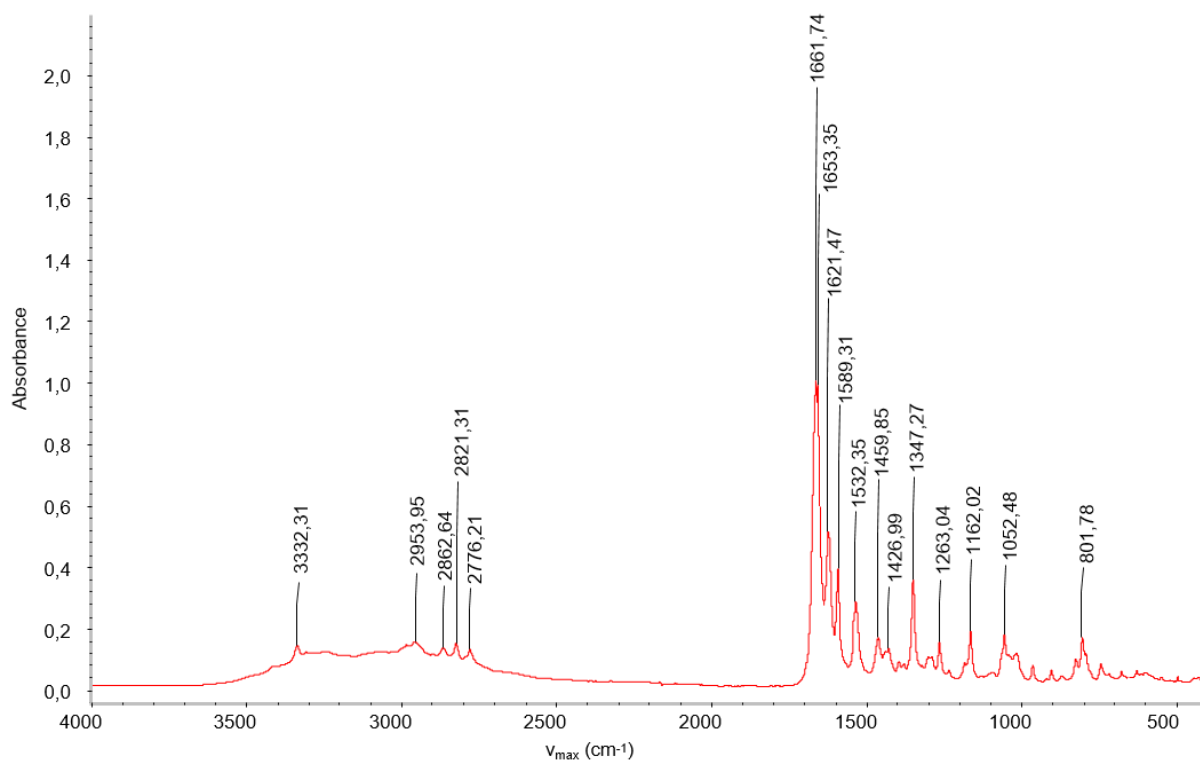

**Figure S66.** ATR-FTIR spectrum of compound **5i** (method C).

### Visualizations of Nuclear magnetic resonance (NMR) and Infrared (IR) spectra of compound **5j**

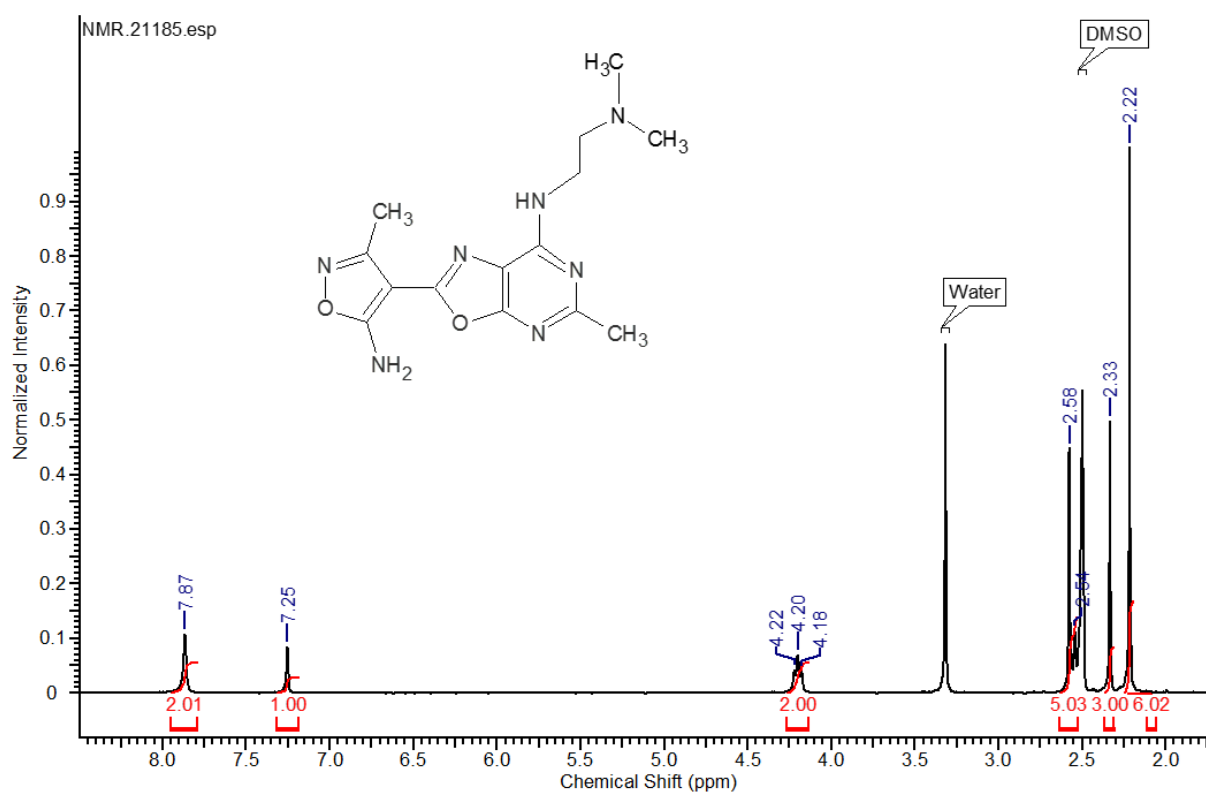

**Figure S67.**  $^1\text{H}$ -NMR spectrum of compound **5j** in DMSO- $d_6$ .



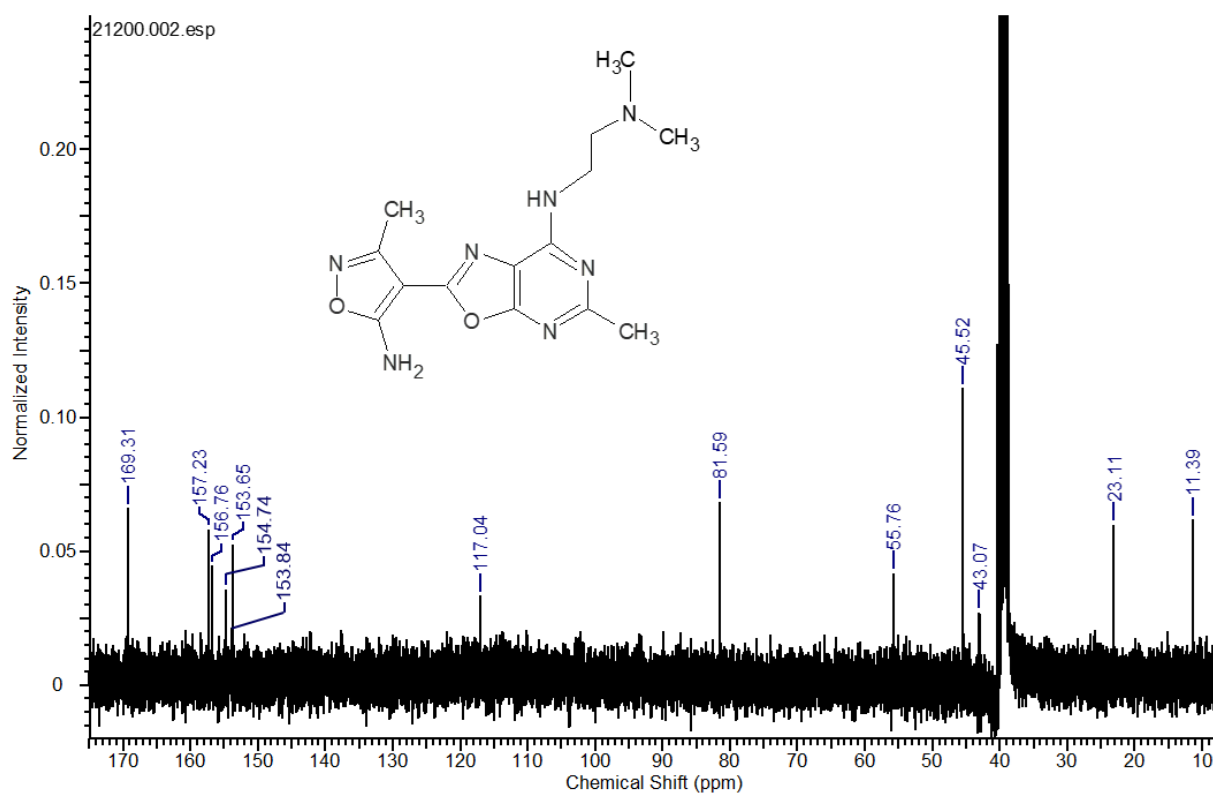

**Figure S68.**  $^{13}\text{C}$ -NMR spectrum of compound **5j** in DMSO- $d_6$ .

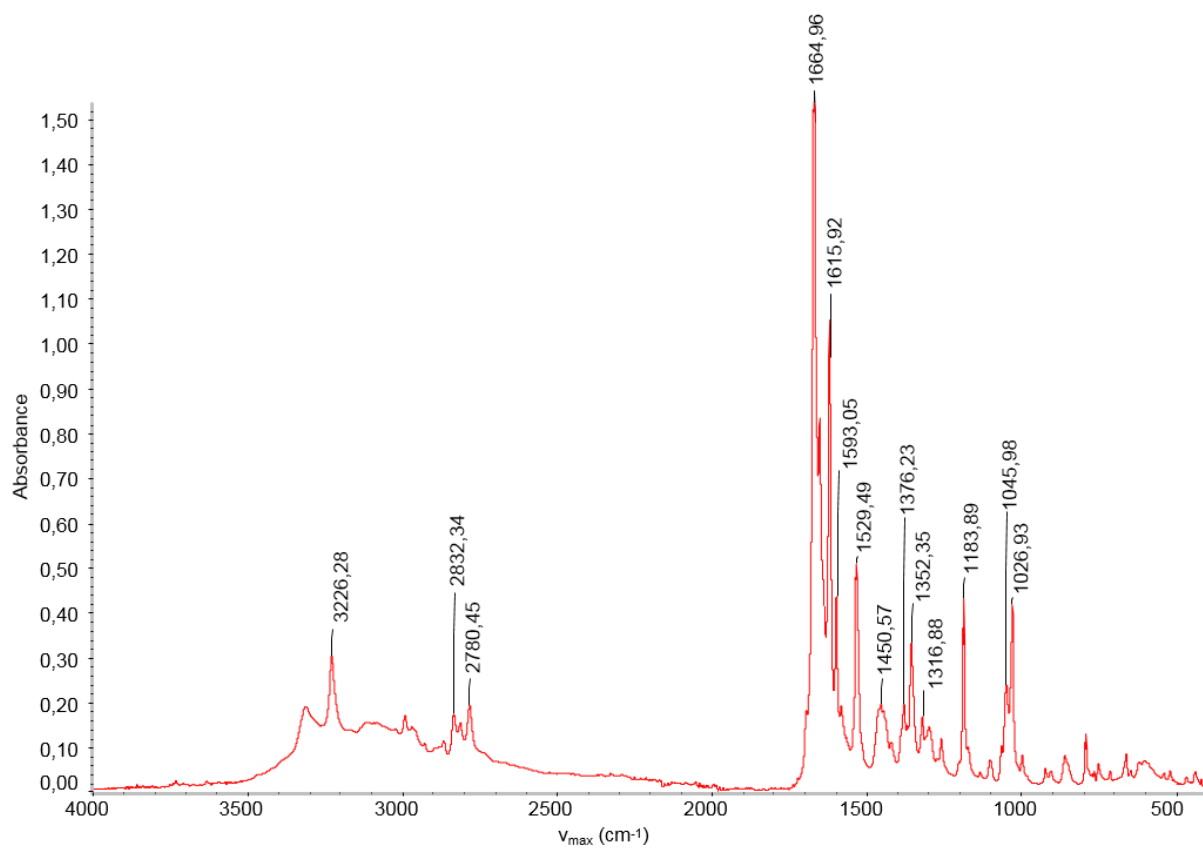

**Figure S69.** ATR-FTIR spectrum of compound **5j**.

## Visualizations of Nuclear magnetic resonance (NMR) and Infrared (IR) spectra of compound 5k

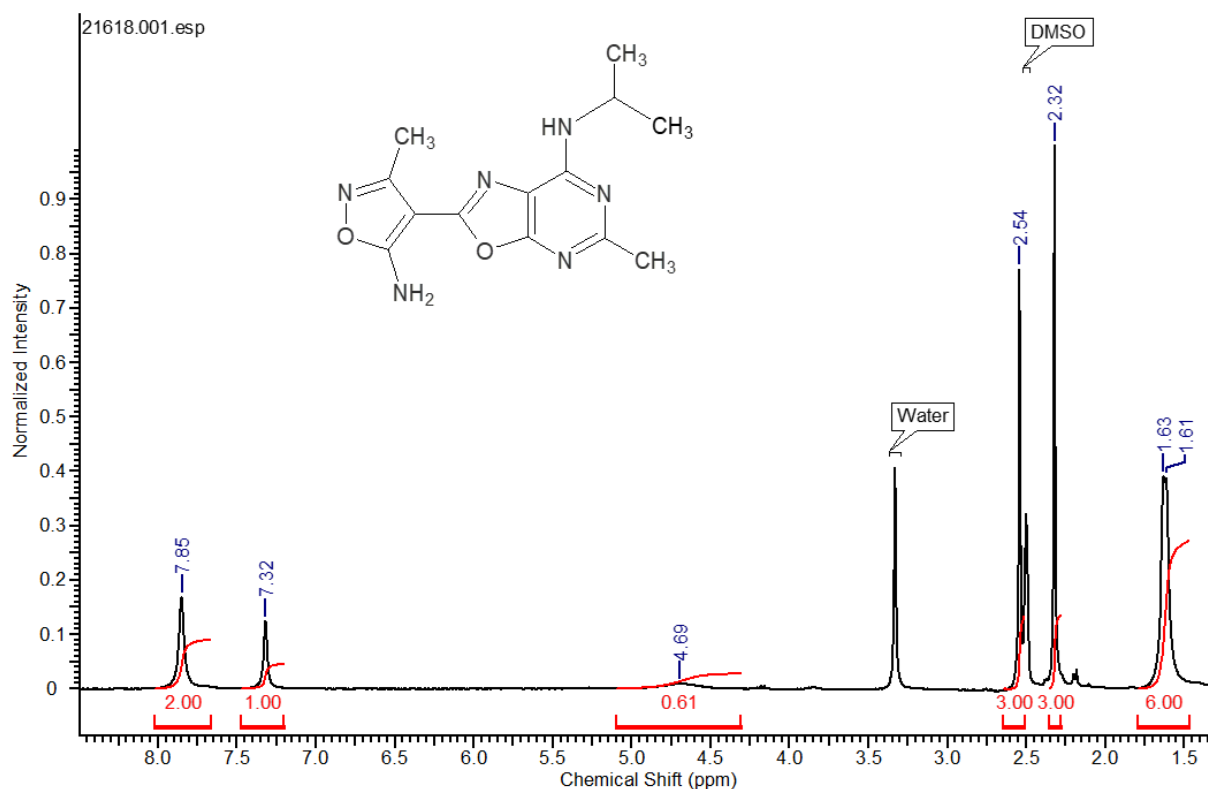

**Figure S70.** <sup>1</sup>H-NMR spectrum of compound 5k in DMSO-d<sub>6</sub>.

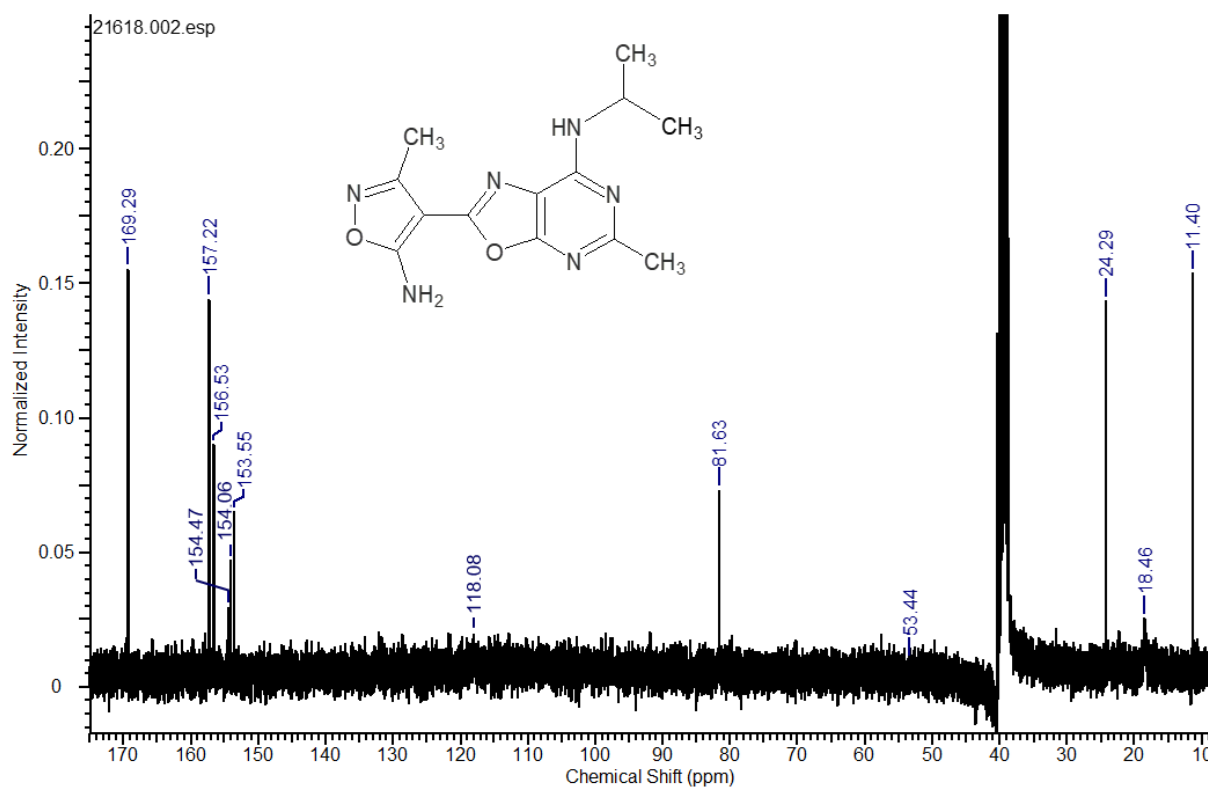

**Figure S71.** <sup>13</sup>C-NMR spectrum of compound 5k in DMSO-d<sub>6</sub>.

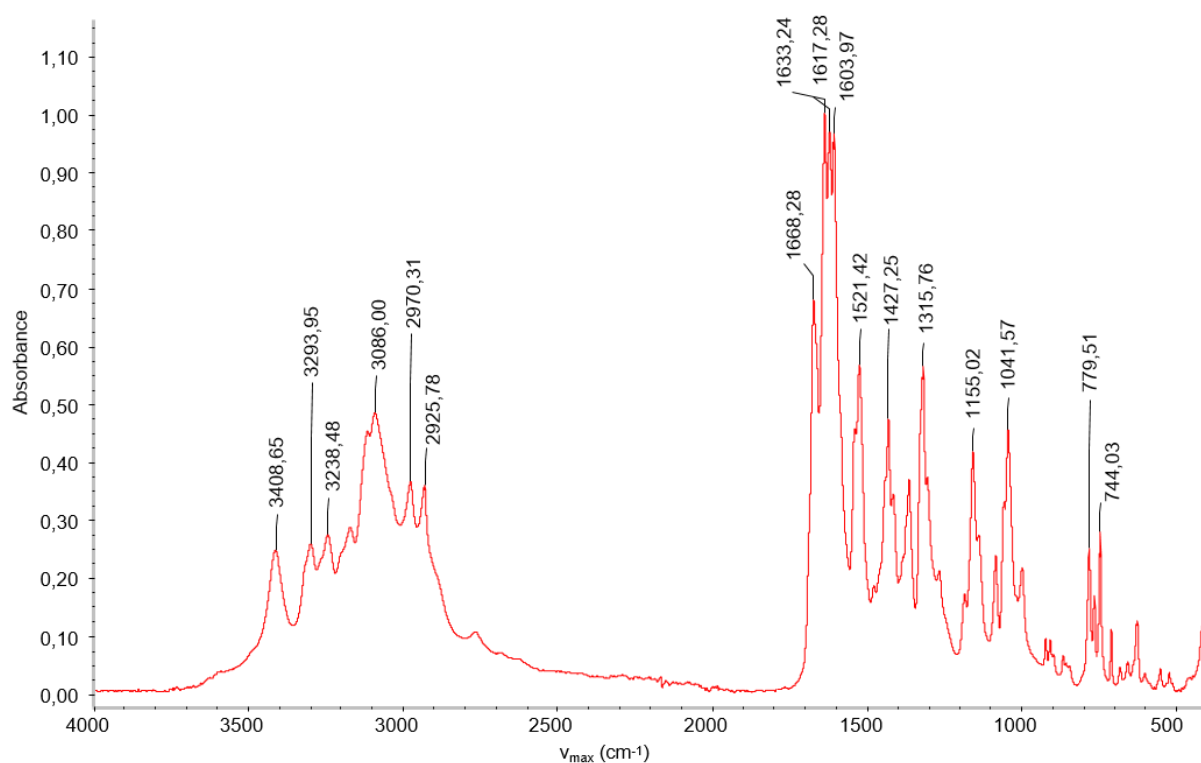

**Figure S72.** ATR-FTIR spectrum of compound **5k**.

### Visualizations of Nuclear magnetic resonance (NMR) and Infrared (IR) spectra of compound **5l**

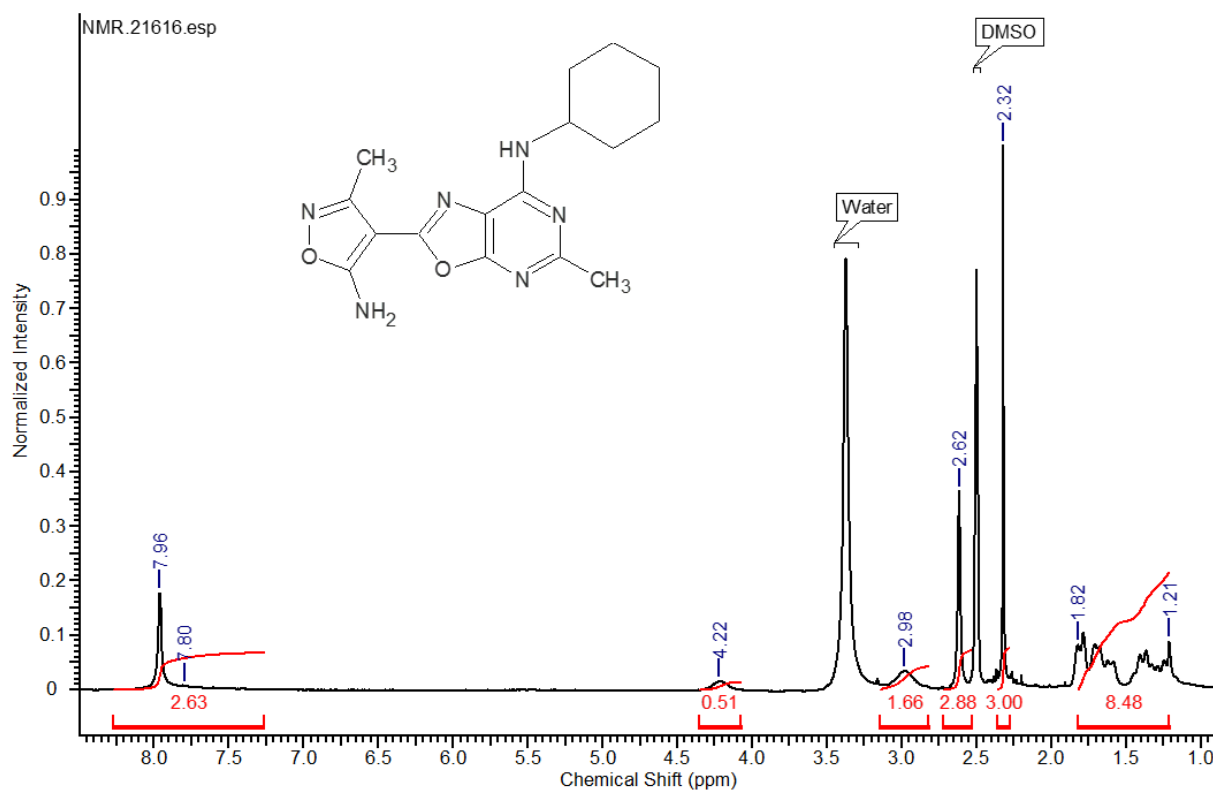

**Figure S73.** <sup>1</sup>H-NMR spectrum of compound **5l** in DMSO- $d_6$ .

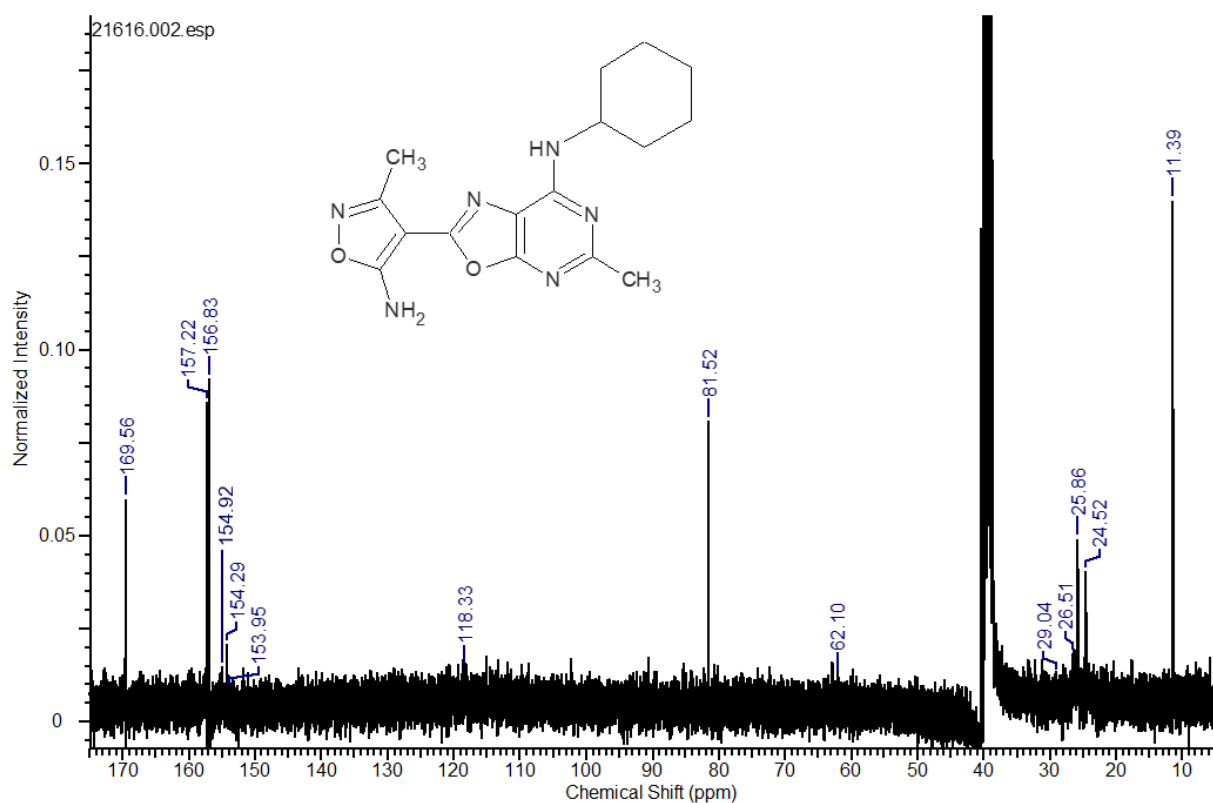

**Figure S74.** <sup>13</sup>C-NMR spectrum of compound **5l** in DMSO-d<sub>6</sub>.

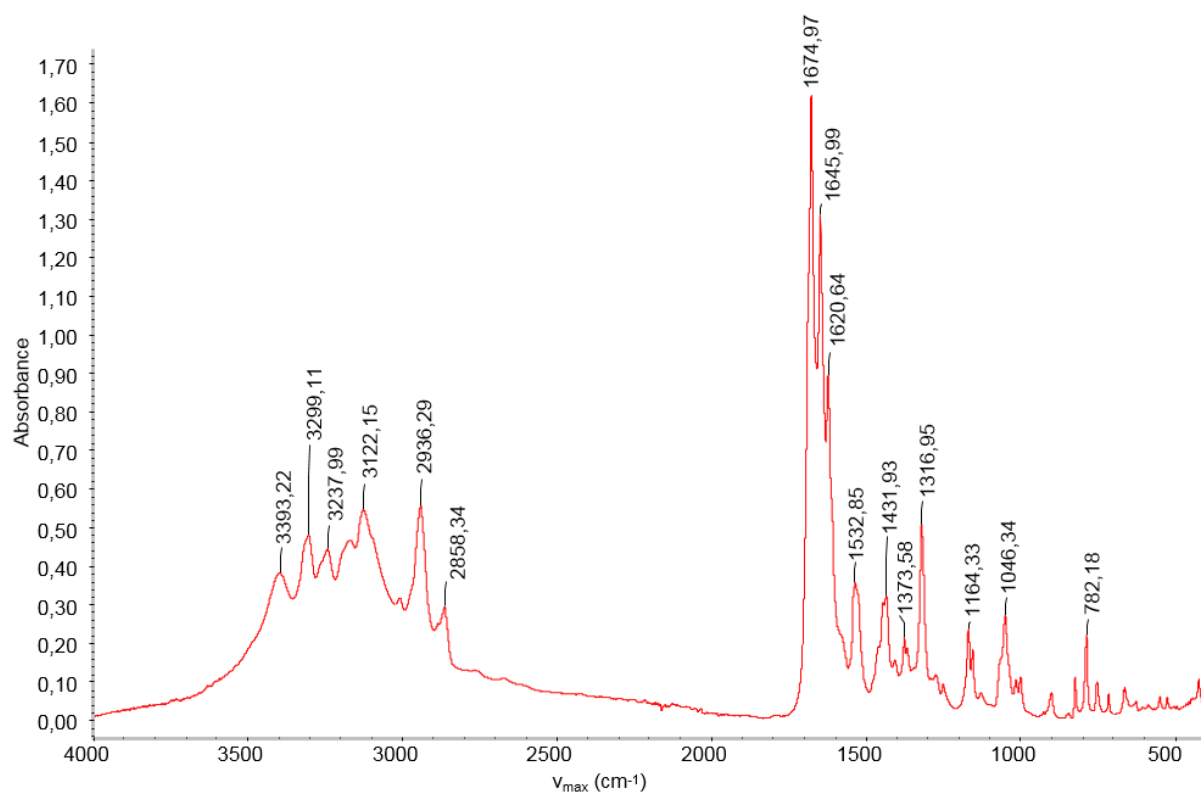

**Figure S75.** ATR-FTIR spectrum of compound **5l**.

## Visualizations of Nuclear magnetic resonance (NMR) and Infrared (IR) spectra of compound 7m

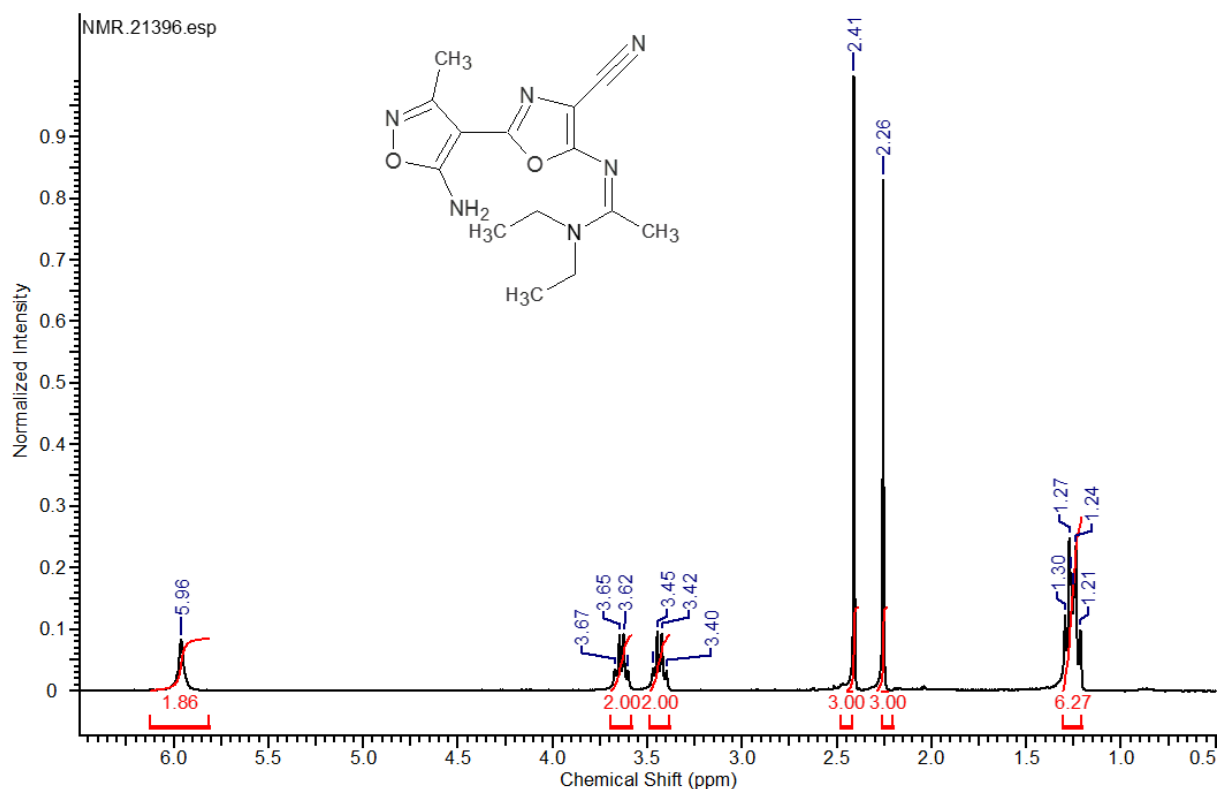

**Figure S76.**  $^1\text{H}$ -NMR spectrum of compound **7m** in  $\text{CDCl}_3$ .

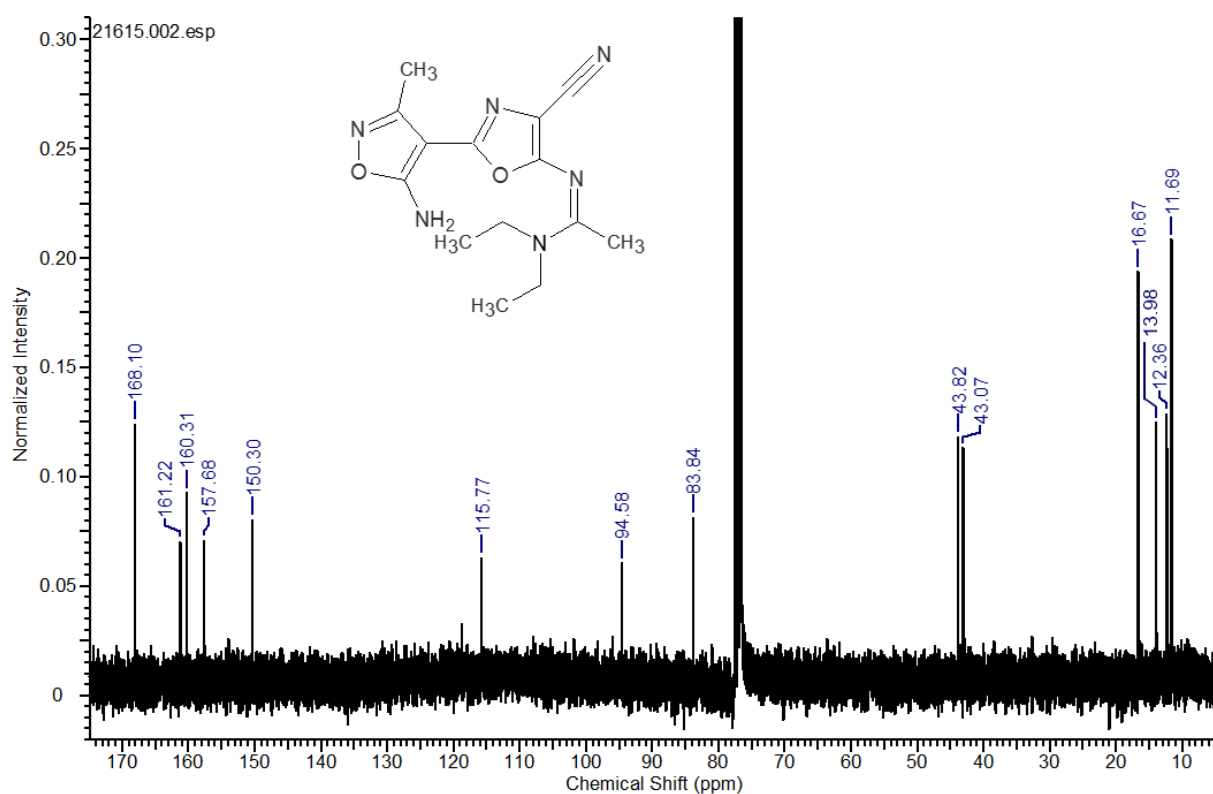

**Figure S77.**  $^{13}\text{C}$ -NMR spectrum of compound **7m** in  $\text{CDCl}_3$ .

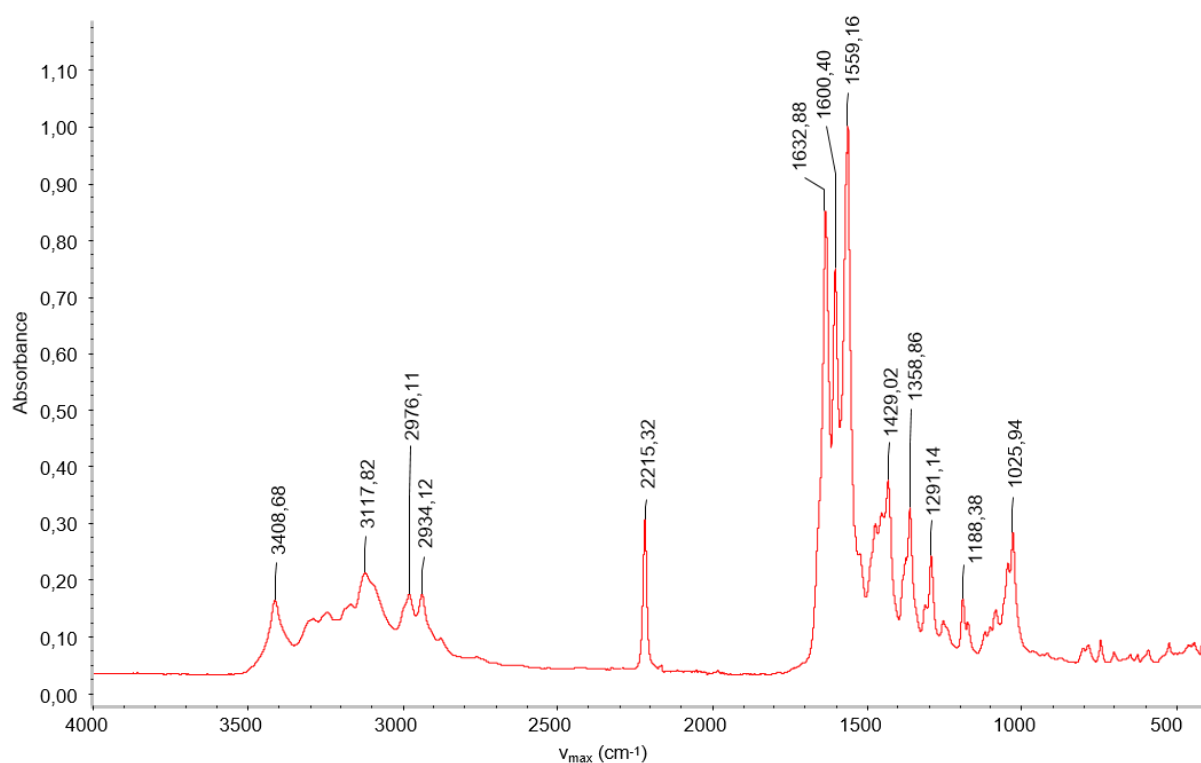

**Figure S78.** ATR-FTIR spectrum of compound **7m**.

## Single crystal X-ray diffraction measurement of compound **5h**

**Table S25.** Selected bond lengths (Å), bond and torsion angles (°) in **5h**.

| <i>bond lengths</i> |             |         |           |
|---------------------|-------------|---------|-----------|
| O1—C5               | 1.375 (2)   | N6—C11  | 1.453 (2) |
| O1—C1               | 1.3860 (19) | N7—C12  | 1.460 (2) |
| O2—C8               | 1.343 (2)   | N7—C16  | 1.463 (2) |
| O2—N4               | 1.436 (2)   | N7—C13  | 1.465 (2) |
| O3—C15              | 1.425 (3)   | C1—C6   | 1.426 (2) |
| O3—C14              | 1.426 (2)   | C2—C10  | 1.506 (2) |
| N1—C1               | 1.295 (2)   | C3—C4   | 1.407 (2) |
| N1—C4               | 1.399 (2)   | C4—C5   | 1.372 (2) |
| N2—C5               | 1.322 (2)   | C6—C8   | 1.381 (2) |
| N2—C2               | 1.347 (2)   | C6—C7   | 1.418 (2) |
| N3—C2               | 1.336 (2)   | C7—C9   | 1.485 (3) |
| N3—C3               | 1.358 (2)   | C11—C12 | 1.519 (2) |

|                       |              |             |              |
|-----------------------|--------------|-------------|--------------|
| N4—C7                 | 1.307 (2)    | C13—C14     | 1.506 (3)    |
| N5—C8                 | 1.327 (2)    | C15—C16     | 1.512 (3)    |
| N6—C3                 | 1.341 (2)    |             |              |
| <i>bond angles</i>    |              |             |              |
| C5—O1—C1              | 103.53 (13)  | C5—C4—C3    | 115.82 (15)  |
| C8—O2—N4              | 107.87 (13)  | N1—C4—C3    | 134.60 (15)  |
| C15—O3—C14            | 111.50 (15)  | N2—C5—C4    | 129.10 (15)  |
| C1—N1—C4              | 103.86 (13)  | N2—C5—O1    | 122.99 (15)  |
| C5—N2—C2              | 110.47 (14)  | C4—C5—O1    | 107.90 (14)  |
| C2—N3—C3              | 119.46 (14)  | C8—C6—C7    | 104.49 (15)  |
| C7—N4—O2              | 106.20 (13)  | C8—C6—C1    | 122.96 (16)  |
| C3—N6—C11             | 124.69 (14)  | C7—C6—C1    | 132.54 (16)  |
| C12—N7—C16            | 112.34 (14)  | N4—C7—C6    | 111.57 (16)  |
| C12—N7—C13            | 109.50 (14)  | N4—C7—C9    | 119.38 (16)  |
| C16—N7—C13            | 108.34 (14)  | C6—C7—C9    | 129.04 (16)  |
| N1—C1—O1              | 115.14 (14)  | N5—C8—O2    | 117.43 (15)  |
| N1—C1—C6              | 125.72 (15)  | N5—C8—C6    | 132.71 (15)  |
| O1—C1—C6              | 119.14 (14)  | O2—C8—C6    | 109.86 (15)  |
| N3—C2—N2              | 127.64 (15)  | N6—C11—C12  | 112.64 (15)  |
| N3—C2—C10             | 116.16 (15)  | N7—C12—C11  | 112.02 (14)  |
| N2—C2—C10             | 116.19 (15)  | N7—C13—C14  | 110.12 (15)  |
| N6—C3—N3              | 117.36 (14)  | O3—C14—C13  | 112.02 (16)  |
| N6—C3—C4              | 125.15 (15)  | O3—C15—C16  | 111.97 (18)  |
| N3—C3—C4              | 117.49 (15)  | N7—C16—C15  | 109.50 (17)  |
| C5—C4—N1              | 109.57 (14)  |             |              |
| <i>torsion angles</i> |              |             |              |
| C8—O2—N4—C7           | 0.20 (19)    | O1—C1—C6—C8 | −179.98 (15) |
| C4—N1—C1—O1           | 0.39 (18)    | N1—C1—C6—C7 | 179.03 (18)  |
| C4—N1—C1—C6           | −179.94 (16) | O1—C1—C6—C7 | −1.3 (3)     |
| C5—O1—C1—N1           | −0.08 (18)   | O2—N4—C7—C6 | 0.2 (2)      |
| C5—O1—C1—C6           | −179.77 (14) | O2—N4—C7—C9 | −178.91 (16) |
| C3—N3—C2—N2           | 1.3 (3)      | C8—C6—C7—N4 | −0.4 (2)     |
| C3—N3—C2—C10          | −179.82 (15) | C1—C6—C7—N4 | −179.29 (17) |
| C5—N2—C2—N3           | −0.2 (2)     | C8—C6—C7—C9 | 178.51 (19)  |

|              |              |                |              |
|--------------|--------------|----------------|--------------|
| C5—N2—C2—C10 | −179.11 (15) | C1—C6—C7—C9    | −0.3 (3)     |
| C11—N6—C3—N3 | 170.98 (15)  | N4—O2—C8—N5    | 179.59 (15)  |
| C11—N6—C3—C4 | −9.0 (3)     | N4—O2—C8—C6    | −0.49 (19)   |
| C2—N3—C3—N6  | 178.86 (15)  | C7—C6—C8—N5    | −179.53 (19) |
| C2—N3—C3—C4  | −1.2 (2)     | C1—C6—C8—N5    | −0.5 (3)     |
| C1—N1—C4—C5  | −0.55 (18)   | C7—C6—C8—O2    | 0.57 (19)    |
| C1—N1—C4—C3  | −179.63 (18) | C1—C6—C8—O2    | 179.55 (15)  |
| N6—C3—C4—C5  | −179.83 (16) | C3—N6—C11—C12  | 86.5 (2)     |
| N3—C3—C4—C5  | 0.2 (2)      | C16—N7—C12—C11 | −65.50 (19)  |
| N6—C3—C4—N1  | −0.8 (3)     | C13—N7—C12—C11 | 174.08 (13)  |
| N3—C3—C4—N1  | 179.23 (17)  | N6—C11—C12—N7  | −164.13 (13) |
| C2—N2—C5—C4  | −1.0 (2)     | C12—N7—C13—C14 | −177.90 (14) |
| C2—N2—C5—O1  | −179.64 (15) | C16—N7—C13—C14 | 59.27 (19)   |
| N1—C4—C5—N2  | −178.29 (16) | C15—O3—C14—C13 | 54.1 (2)     |
| C3—C4—C5—N2  | 1.0 (3)      | N7—C13—C14—O3  | −57.0 (2)    |
| N1—C4—C5—O1  | 0.53 (18)    | C14—O3—C15—C16 | −54.7 (2)    |
| C3—C4—C5—O1  | 179.79 (14)  | C12—N7—C16—C15 | 179.45 (16)  |
| C1—O1—C5—N2  | 178.63 (15)  | C13—N7—C16—C15 | −59.5 (2)    |
| C1—O1—C5—C4  | −0.28 (17)   | O3—C15—C16—N7  | 58.0 (2)     |
| N1—C1—C6—C8  | 0.4 (3)      |                |              |

**Table S26.** Geometry of proposed hydrogen bonds in **5h**.

| <i>D</i> —H $\cdots$ <i>A</i>      | <i>D</i> —H (Å) | H $\cdots$ <i>A</i> (Å) | <i>D</i> $\cdots$ <i>A</i> (Å) | <i>D</i> —H $\cdots$ <i>A</i> (°) |
|------------------------------------|-----------------|-------------------------|--------------------------------|-----------------------------------|
| N5—H5A $\cdots$ O3 <sup>i</sup>    | 0.88            | 2.02                    | 2.889 (2)                      | 167                               |
| N5—H5B $\cdots$ N1                 | 0.88            | 2.40                    | 2.955 (3)                      | 122                               |
| N6—H6 $\cdots$ N4 <sup>ii</sup>    | 0.88            | 2.10                    | 2.959 (3)                      | 166                               |
| C9—H9A $\cdots$ N3 <sup>iii</sup>  | 0.98            | 2.68                    | 3.650 (3)                      | 172                               |
| C11—H11A $\cdots$ N1               | 0.99            | 2.54                    | 3.050 (3)                      | 112                               |
| C13—H13B $\cdots$ N2 <sup>iv</sup> | 0.99            | 2.63                    | 3.615 (3)                      | 172                               |

Symmetry codes: (i)  $-x, -y+1, -z$ ; (ii)  $x+1, y-1, z$ ; (iii)  $x-1, y+1, z$ ; (iv)  $-x+1, -y+1, -z+1$ .



# BIOLOGY

**Table S27.** Primer sequences used in his study.

| Gen                            | 5' - 3' sequence           |                            |
|--------------------------------|----------------------------|----------------------------|
|                                | mouse                      | human                      |
| <b>ERK1</b>                    | TACCTGGACCAGCTCAACCACATT   | GTGGCCCCAGTTCAATCTC        |
|                                | AGCAGGTCAAGAGCTTTGGAGTCA   | GGGTTTGAATGAGATGAGGGG      |
| <b>ERK2</b>                    | GGAACAGGTTGTTCCCAAATGCTGAC | TATTACGACCCGAGTGACGA       |
|                                | CTCCTTAGGTAAGTCGTCCAACCTCC | AAGAACACCGATGTCTGAGC       |
| <b>p38<math>\alpha</math></b>  | GAAGTCATCAGCTTTGTGCCACC    | TATGCGTCTGACAGGAACAC       |
|                                | CCACAAAGATAGGTGGACAGACG    | GGGCCGCTGTAATTCTCTTA       |
| <b>p38<math>\beta</math></b>   | TGGCACCCATGAAATTGAGCAGTG   | ACAGTGGATATCTGGTCCGT       |
|                                | GGCATATGTACACATCCGTGCATTCC | ATATATGTCCGGGCGTGTTT       |
| <b>p38<math>\gamma</math></b>  | GGACATTTGGTCCGTTGGCTGCAT   | GGCACATGGCCTGTGTAATA       |
|                                | CCATGTAGTTCTTGGCCTCTGC     | TAGGAAATGTCCCCACCTT        |
| <b>p38<math>\delta</math></b>  | AGAAGGTTGGCCATCAAGAAGCTGA  | CTGAGGTATATCCACGCTGC       |
|                                | TCCAGAAGCCCAATGACGTTCTCA   | TGTAGCGCATCCAATTCAAGA      |
| <b>JNK</b>                     | AGCTCGGAACACCTTGTCTGAAT    | GCCTTCTCCTTCAGCACAG        |
|                                | GGAGAGCTTCATCTACGGAGATCC   | AGGCAGGCGGCTAGTCAC         |
| <b>Casp3</b>                   | TGTCATCTCGCTCTGGTACG       | TTCAGAGGGGATCGTTGTAGAAGTC  |
|                                | AAATGACCCCTTCATCACCA       | CAAGCTTGTCGGCATACTGTTTCAG  |
| <b>Casp8</b>                   | ACAATGCCAGATTCTCCCTAC      | GCAAAAGCACGGGAGAAAG        |
|                                | CAGACAGTATCCCCGAGGTTTG     | GGATACAGCAGATGAAGCAG       |
| <b>Casp9</b>                   | AGCCAGATGCTGTCCCATAC       | GAGTCAGGCTCTTCCTTTG        |
|                                | CAGGAGACAAAACCTGGGAA       | CCTCAAACCTCAAGAGCAC        |
| <b>BCL2</b>                    | CTCGTCGCTACCGTCGTGACTTCG   | TATAAGCTGTGCGAGAGGGGCTA    |
|                                | CAGATGCCGGTTTCAGGTACTCAGTC | GTACTIONAGTCATCCACAGGGCGAT |
| <b>NF-<math>\kappa</math>B</b> | GAAATTCCTGATCCAGACAAAAAC   | GAGTTACCTACCAGGGCTATTC     |
|                                | ATCACTTCAATGGCCTCTGTGTAG   | CTCTCCTCATCCTCACTCTCT      |
| <b>FAS</b>                     | GCGATGAAGAGCATGGTTTAG      | GACAAAGCCCATTTTCTTCC       |
|                                | GGCTCAAGGGTTCCATGTT        | ATTTATTGCCACTGTTTCAGG      |
| <b>GADPH</b>                   | CTCCACTCACGGCAAATTCAACGG   | AGTCAGCCGCATCTTCTTTT       |
|                                | GGTGAAGACACCAGTAGACTCCA    | TGAGGTCAATGAAGGGGTCA       |
